# Supplementary material for: Derribar muros: la metamorfosis del mundo después de lacaída del Muro de Berlín
Source: Royal Society of Chemistry journal article supplement (doi:10.1039/c8ra04073g), 2009-01-01

# Discovery of Acylphloroglucinol-based Meroterpenoid Enantiomers as KSHV Inhibitors from *Hypericum japonicum*

Linzhen Hu, †<sup>a,b</sup> Yanfei Liu, †<sup>c</sup> Yanxing Wang,<sup>d</sup> Zhenzhen Wang,<sup>b</sup> Jinfeng Huang,<sup>b</sup> Yongbo Xue,<sup>b</sup> Junjun Liu,<sup>b</sup> Zhenming Liu,<sup>\*c</sup> Yong Chen<sup>\*a</sup> and Yonghui Zhang<sup>\*b</sup>

<sup>a</sup> National & Local Joint Engineering Research Center of High-throughput Drug Screening Technology, Hubei Key Laboratory of Biotechnology of Chinese Traditional Medicine, School of Life Sciences, Hubei University, Wuhan 430062, Hubei Province, P. R. China

<sup>b</sup> Hubei Key Laboratory of Natural Medicinal Chemistry and Resource Evaluation, Tongji Medical College, Huazhong University of Science and Technology, Wuhan 430030, Hubei Province, P. R. China

<sup>c</sup> The Central Hospital of Wuhan, Huazhong University of Science and Technology, Wuhan 430014, Hubei Province, P. R. China

<sup>d</sup> State Key Laboratory of Natural and Biomimetic Drugs, School of Pharmaceutical Sciences, Peking University, Beijing 100191, P. R. China

Corresponding Authors

\* Y. Zhang: e-mail zhangyh@mails.tjmu.edu.cn; fax 86-27-83692762; tel 86-027-83692892.

\* Y. Chen: e-mail cy101610@qq.com; fax 86-27-88663590.

\* Z. Liu: e-mail zmliu@bjmu.edu.cn.

† These authors contributed equally to this work.

# CONTENTS

|                                                                                                                                                                                                                             |    |
|-----------------------------------------------------------------------------------------------------------------------------------------------------------------------------------------------------------------------------|----|
| <b>Figure S1.</b> Key 2D NMR correlations of <b>2</b> .....                                                                                                                                                                 | 1  |
| <b>Figure S2.</b> Effects on Human iSLK.219 cells viabilities and inhibition on lytic replication of KSHV infecting Vero cells of <b>1a/1b-4a/4b</b> were measured using CDV as positive control <i>in vitro</i> .<br>..... | 1  |
| <b>Extraction and Isolation</b> .....                                                                                                                                                                                       | 2  |
| <b>Computational ECD details</b> .....                                                                                                                                                                                      | 3  |
| HRESIMS of compound <b>1</b> .....                                                                                                                                                                                          | 45 |
| <sup>1</sup> H NMR of compound <b>1</b> (in methanol- <i>d</i> <sub>4</sub> ).....                                                                                                                                          | 46 |
| <sup>13</sup> C NMR of compound <b>1</b> (in methanol- <i>d</i> <sub>4</sub> ).....                                                                                                                                         | 47 |
| HSQC of compound <b>1</b> (in methanol- <i>d</i> <sub>4</sub> ) .....                                                                                                                                                       | 48 |
| HMBC of compound <b>1</b> (in methanol- <i>d</i> <sub>4</sub> ) .....                                                                                                                                                       | 49 |
| <sup>1</sup> H- <sup>1</sup> H COSY of compound <b>1</b> (in methanol- <i>d</i> <sub>4</sub> ).....                                                                                                                         | 50 |
| NOESY of compound <b>1</b> (in methanol- <i>d</i> <sub>4</sub> ).....                                                                                                                                                       | 51 |
| UV of compound <b>1</b> (in MeOH).....                                                                                                                                                                                      | 52 |
| IR of compound <b>1</b> (KBr disc) .....                                                                                                                                                                                    | 53 |
| HRESIMS of compound <b>2</b> .....                                                                                                                                                                                          | 54 |
| <sup>1</sup> H NMR of compound <b>2</b> (in methanol- <i>d</i> <sub>4</sub> ).....                                                                                                                                          | 55 |
| <sup>13</sup> C NMR of compound <b>2</b> (in methanol- <i>d</i> <sub>4</sub> ).....                                                                                                                                         | 56 |
| HSQC of compound <b>2</b> (in methanol- <i>d</i> <sub>4</sub> ) .....                                                                                                                                                       | 58 |
| HMBC of compound <b>2</b> (in methanol- <i>d</i> <sub>4</sub> ) .....                                                                                                                                                       | 59 |
| <sup>1</sup> H- <sup>1</sup> H COSY of compound <b>2</b> (in methanol- <i>d</i> <sub>4</sub> ).....                                                                                                                         | 60 |

|                                                                                                     |    |
|-----------------------------------------------------------------------------------------------------|----|
| NOESY of compound <b>2</b> (in methanol- <i>d</i> <sub>4</sub> ).....                               | 61 |
| UV of compound <b>2</b> (in MeOH).....                                                              | 62 |
| IR of compound <b>2</b> (KBr disc) .....                                                            | 63 |
| HRESIMS of compound <b>3</b> .....                                                                  | 64 |
| <sup>1</sup> H NMR of compound <b>3</b> (in methanol- <i>d</i> <sub>4</sub> ).....                  | 65 |
| <sup>13</sup> C NMR of compound <b>3</b> (in methanol- <i>d</i> <sub>4</sub> ).....                 | 67 |
| HSQC of compound <b>3</b> (in methanol- <i>d</i> <sub>4</sub> ) .....                               | 68 |
| HMBC of compound <b>3</b> (in methanol- <i>d</i> <sub>4</sub> ) .....                               | 69 |
| <sup>1</sup> H- <sup>1</sup> H COSY of compound <b>3</b> (in methanol- <i>d</i> <sub>4</sub> )..... | 70 |
| NOESY of compound <b>3</b> (in methanol- <i>d</i> <sub>4</sub> ).....                               | 71 |
| UV of compound <b>3</b> (in MeOH).....                                                              | 72 |
| IR of compound <b>3</b> (KBr disc) .....                                                            | 73 |
| HRESIMS of compound <b>4</b> .....                                                                  | 74 |
| <sup>1</sup> H NMR of compound <b>4</b> (in methanol- <i>d</i> <sub>4</sub> ).....                  | 75 |
| <sup>13</sup> C NMR of compound <b>4</b> (in methanol- <i>d</i> <sub>4</sub> ).....                 | 76 |
| HSQC of compound <b>4</b> (in methanol- <i>d</i> <sub>4</sub> ) .....                               | 78 |
| HMBC of compound <b>4</b> (in methanol- <i>d</i> <sub>4</sub> ) .....                               | 79 |
| <sup>1</sup> H- <sup>1</sup> H COSY of compound <b>4</b> (in methanol- <i>d</i> <sub>4</sub> )..... | 80 |
| NOESY of compound <b>4</b> (in methanol- <i>d</i> <sub>4</sub> ).....                               | 81 |
| UV of compound <b>4</b> (in MeOH).....                                                              | 82 |
| IR of compound <b>4</b> (KBr disc) .....                                                            | 83 |

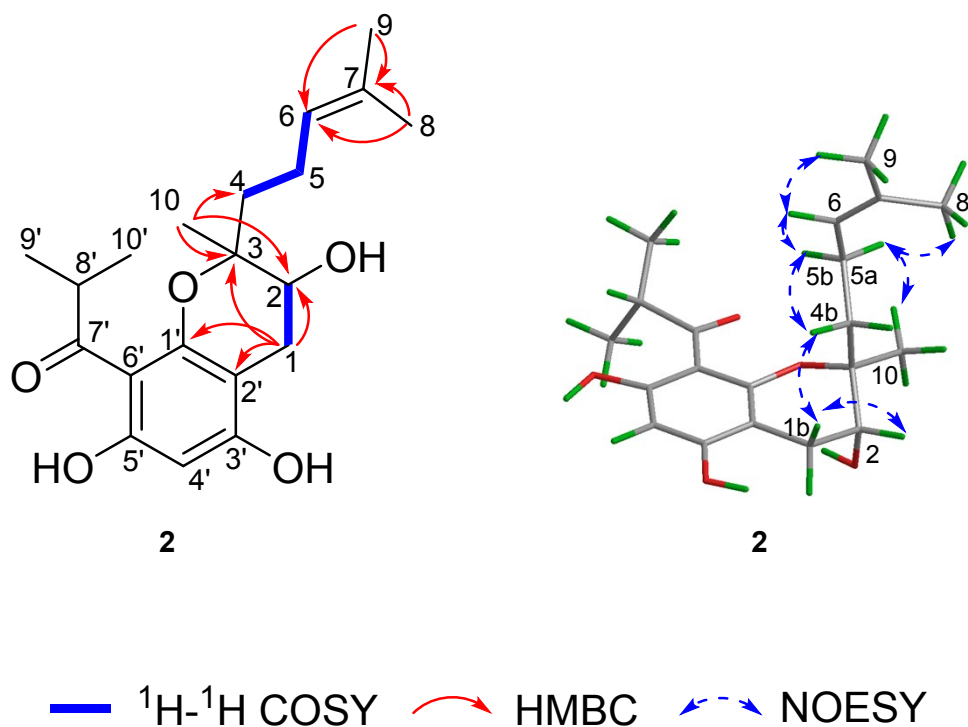

**Figure S1.** Key 2D NMR correlations of **2**.

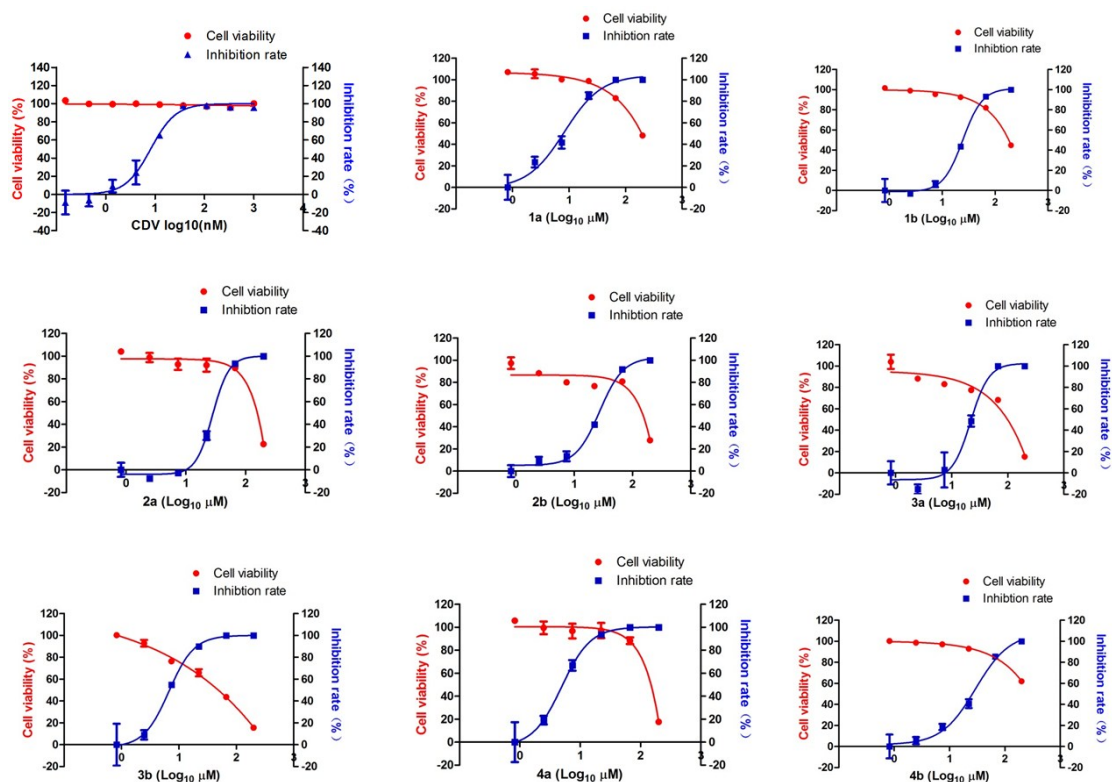

**Figure S2.** Effects on Human iSLK.219 cells viabilities and inhibition on lytic replication of KSHV infecting Vero cells of **1a/1b-4a/4b** were measured using CDV as positive control *in vitro*.

### Extraction and Isolation

The whole herbs of *H. japonicum* (30 kg) were soaked in 95% EtOH at 25 °C and yielded a crude extract (0.75 kg) after removed the solvent under vacuum. The crude extract was suspended in water and sequentially partitioned with petroleum ether, chloroform, and ethyl acetate. The petroleum ether-soluble extract (400 g) was subsequently partitioned by silica gel column chromatography (3 kg, 20 × 120 cm; petroleum ether-acetone, 50:1→5:1) to afford seven fractions (Fr.1–Fr.7). Fr.6 was repeatedly chromatographed using silica gel CC (0.6 kg, 10 × 100 cm), eluting with a gradient of petroleum ether-EtoAc (30:1→3:1) to afford six subfractions (Fr.6.1–Fr.6.6). Fr.6.4 was subjected to MPLC (ODS, 1.5 × 20 cm, MeOH-H<sub>2</sub>O, 30–90%) to obtain subfractions Fr.6.4.1–Fr.6.4.6. Fr.6.4.3 was partitioned by Sephadex LH-20 (2 × 150 cm, MeOH) and purified via semi-preparative HPLC (CH<sub>3</sub>CN/H<sub>2</sub>O 55:45). Finally, a second semi-preparative HPLC (MeOH/H<sub>2</sub>O 53:47) was performed to yield three pairs of racemates, namely, **1** (4.00 mg), **2** (7.00 mg), and **3** (11.02 mg). Fr.6.4.2 was repurified by silica gel CC (CHCl<sub>3</sub>/MeOH 40:1), Sephadex LH-20 (2 × 150 cm, CH<sub>2</sub>Cl<sub>2</sub>-MeOH, 1:1), and semi-preparative HPLC (CH<sub>3</sub>CN/H<sub>2</sub>O 70:30) to afford the pair of racemates **4** (3.51 mg).

### Computational ECD details

Conformational analyses were performed whereby both BALLOON and confab programs<sup>1,2</sup> in order to confirm the stereochemistry structure of compounds **1b**, **2a/2b**, and **3b**. The BALLOON program explores conformational spaces with genetic algorithm, and synchronously, the confab program systematically generates diverse low energy conformations that are proposed to be close to crystal structures. The conformations generated by the above programs were assembled together via the removal of duplicated conformations whose root mean square (RMS) distance was less than 0.5 Å. Semi-empirical PM3 quantum mechanical geometry optimizations were fulfilled on conformations through the Gaussian 09 program.<sup>3</sup> Duplicated conformations after geometry optimization were subsequently identified and disposed. Remaining conformations were further optimized at B3LYP/6-31G\* level of theory in methanol solvent with IEFPCM3 solvation model using Gaussian 09 program,<sup>4</sup> and duplicated conformations emerging after these calculations were removed according to the same RMS criteria above. Harmonic vibrational frequencies were performed to establish the stability of the finally obtained conformers. Oscillator strengths and rotational strengths of 20 weakest electronic excitations of each conformer were calculated by the TDDFT methodology at the B3LYP/6-311++G\*\* level of theory adopting methanol as solvent by the IEFPCM solvation model carried out in Gaussian 09 program. The ECD spectra data for each conformer were then simulated by using a Gaussian function with a bandwidth  $\sigma$  of 0.45 eV. Calculated spectra for each conformation were combined after Boltzmann weighting according to their population contribution.

- (1) Vainio, M. J., Johnson, M. S., **2007**. Generating conformer ensembles using a multiobjective genetic algorithm. *J. Chem. Inf. Model.* *47*, 2462–2474.
- (2) O'Boyle, N. M., Vandermeersch, T., Flynn, C. J., Maguire, A. R., Hutchison, G. R., **2011**. Confab-systematic generation of diverse low-energy conformers. *J. Cheminformatics* *3*, 1–9.
- (3) Frisch, M. J., Trucks, G. W., Schlegel, H. B., Scuseria, G. E., Robb, M. A., Cheeseman, J. R., Scalmani, G., Barone, V., Mennucci, B., Petersson, G. A., Nakatsuji, H., Caricato, M., Li, X., Hratchian, H. P., Izmaylov, A. F., Bloino, J., Zheng, G., Sonnenberg, J. L., Hada, M., Ehara, M., Toyota, K., Fukuda, R., Hasegawa, J., Ishida, M., Nakajima, T., Honda, Y., Kitao, O., Nakai, H., Vreven, T., Montgomery, J. A., Peralta, J. E., Ogliaro, F., Bearpark, M., Heyd, J. J., Brothers, E., Kudin, K. N., Staroverov, V. N., Keith, T., Kobayashi, R., Normand, J., Raghavachari, K., Rendell, A., Burant, J. C., Iyengar, S. S., Tomasi, J., Cossi, M., Rega, N., Millam, J. M., Klene, M., Knox, J. E., Cross, J. B., Bakken, V., Adamo, C., Jaramillo, J., Gomperts, R., Stratmann, R. E., Yazyev, O., Austin, A. J., Cammi, R., Pomelli, C., Ochterski, J. W., Martin, R. L., Morokuma, K., Zakrzewski, V. G., Voth, G. A., Salvador, P., Dannenberg, J. J., Dapprich, S., Daniels, A. D., Farkas, O., Foresman, J. B., Ortiz, J. V., Cioslowski, J., Fox, D. J. Gaussian, Inc., Wallingford CT, 2010.
- (4) Tomasi, J., Mennucci, B., Cammi, R., **2005**. Quantum mechanical continuum solvation models. *Chem. Rev.* *105*, 2999–3094.

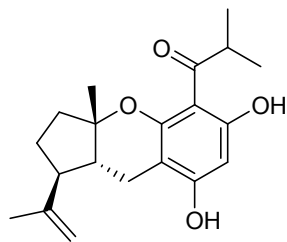

**1b**

Optimized geometries of predominant conformers for compound **1b** at the B3LYP/6-31G (d,p) level in methanol solution.

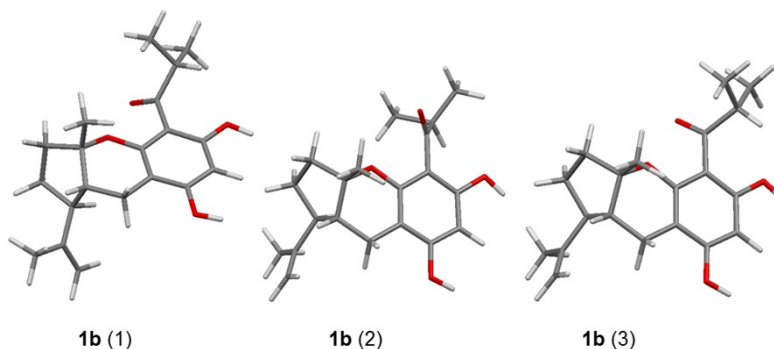

Important thermodynamic parameters (a.u.) and Boltzmann distributions of the optimized compound **1b** at B3LYP/6-31G(d,p) level in methanol solution.

| Conformations | E+ZPE        | G            | %      |
|---------------|--------------|--------------|--------|
| <b>1b (1)</b> | -1078.253342 | -1078.307663 | 75.62% |
| <b>1b (2)</b> | -1078.252215 | -1078.305855 | 11.15% |
| <b>1b (3)</b> | -1078.252391 | -1078.306017 | 13.23% |

E+ZPE, G: total energy with zero point energy (ZPE) and Gibbs free energy in methanol solution at B3LYP/6-31G (d,p) level. %: Boltzmann distributions, using the relative Gibbs free energies as weighting factors.

Optimized Z-matrixes of compound **1b** in methanol solution (Å) at B3LYP/6-31G (d,p) level.

| <b>1b (1)</b> |           |           |           | <b>1b (2)</b> |           |           |           |
|---------------|-----------|-----------|-----------|---------------|-----------|-----------|-----------|
| C             | -1.489183 | 2.856428  | 0.113342  | C             | -1.578917 | 2.833843  | -0.354931 |
| C             | -1.775115 | 0.453837  | -0.235691 | C             | -1.844508 | 0.456438  | 0.141581  |
| C             | 0.374153  | 1.341035  | 0.593465  | C             | 0.356313  | 1.540545  | 0.408164  |
| C             | -0.436027 | 0.268815  | 0.196848  | C             | -0.473094 | 0.415266  | 0.496404  |
| C             | -2.272325 | 1.767968  | -0.272379 | C             | -2.37154  | 1.687218  | -0.284564 |
| C             | -0.180955 | 2.62989   | 0.543522  | C             | -0.228777 | 2.746039  | -0.011826 |
| C             | 4.146206  | 0.920343  | -2.13253  | C             | 4.814028  | 0.456418  | -0.806019 |
| C             | -2.617148 | -0.706232 | -0.669694 | C             | -2.714321 | -0.759572 | 0.26191   |
| C             | 4.058964  | 0.074203  | -1.09753  | C             | 3.82026   | -0.287445 | -1.307265 |
| C             | 1.796192  | 1.131681  | 1.06228   | C             | 1.828868  | 1.468037  | 0.741541  |
| C             | 2.633817  | -2.087147 | -0.875478 | C             | 2.516552  | -2.207659 | -0.199881 |
| C             | 1.776276  | -2.60081  | 0.311149  | C             | 1.81427   | -2.316067 | 1.179452  |

|               |           |           |           |   |           |           |           |
|---------------|-----------|-----------|-----------|---|-----------|-----------|-----------|
| C             | 2.725196  | -0.535692 | -0.71027  | C | 2.572902  | -0.679411 | -0.537597 |
| C             | 2.289647  | -0.284905 | 0.759041  | C | 2.323491  | 0.019167  | 0.817777  |
| C             | 1.207321  | -1.350263 | 0.995672  | C | 1.309521  | -0.905626 | 1.513469  |
| C             | 5.28279   | -0.292273 | -0.288327 | C | 3.882323  | -0.816443 | -2.722287 |
| C             | 0.792141  | -1.552554 | 2.450105  | C | 1.094549  | -0.642588 | 3.000945  |
| C             | -3.872313 | -2.054235 | 0.992679  | C | -4.927891 | -1.631077 | -0.608239 |
| C             | -5.068208 | -1.191517 | -1.080522 | C | -2.711891 | -2.39487  | -1.601175 |
| C             | -3.995245 | -0.898668 | -0.023143 | C | -3.495578 | -1.221629 | -0.973961 |
| O             | -2.196941 | -1.535618 | -1.467878 | O | -2.751472 | -1.417933 | 1.294259  |
| O             | 0.01261   | -1.015677 | 0.219074  | O | 0.014121  | -0.808471 | 0.839987  |
| O             | -3.543582 | 1.945695  | -0.743473 | O | -3.707834 | 1.732003  | -0.572458 |
| O             | 0.632092  | 3.652949  | 0.934913  | O | 0.595891  | 3.831514  | -0.067909 |
| H             | -1.887937 | 3.866948  | 0.062082  | H | -2.012106 | 3.78526   | -0.65467  |
| H             | 5.094021  | 1.360763  | -2.434223 | H | 5.693032  | 0.691762  | -1.401726 |
| H             | 3.27292   | 1.20007   | -2.717659 | H | 4.800234  | 0.85789   | 0.202816  |
| H             | 2.45682   | 1.865414  | 0.584609  | H | 2.407629  | 2.023017  | -0.004952 |
| H             | 1.866202  | 1.329068  | 2.141024  | H | 2.01943   | 1.974467  | 1.698511  |
| H             | 3.625671  | -2.549686 | -0.860024 | H | 3.529208  | -2.621515 | -0.147198 |
| H             | 2.186612  | -2.337381 | -1.842057 | H | 1.98313   | -2.764495 | -0.975672 |
| H             | 0.967242  | -3.270249 | 0.003526  | H | 0.984417  | -3.029137 | 1.188531  |
| H             | 2.395662  | -3.145333 | 1.03236   | H | 2.523294  | -2.629782 | 1.953002  |
| H             | 1.963759  | -0.08419  | -1.356425 | H | 1.713923  | -0.454113 | -1.185992 |
| H             | 3.12672   | -0.524205 | 1.426066  | H | 3.244926  | -0.016856 | 1.411935  |
| H             | 5.213839  | 0.085298  | 0.740154  | H | 3.837434  | -1.913448 | -2.740573 |
| H             | 5.413662  | -1.379056 | -0.212808 | H | 3.025541  | -0.460563 | -3.310734 |
| H             | 6.189796  | 0.126004  | -0.73494  | H | 4.800013  | -0.505736 | -3.230984 |
| H             | 0.342191  | -0.644107 | 2.864788  | H | 0.691515  | 0.361202  | 3.172685  |
| H             | 1.661276  | -1.814229 | 3.063076  | H | 2.040748  | -0.729384 | 3.545564  |
| H             | 0.058309  | -2.362067 | 2.52689   | H | 0.386868  | -1.368094 | 3.415684  |
| H             | -3.599201 | -2.985155 | 0.483855  | H | -4.920998 | -2.415907 | 0.154874  |
| H             | -4.827765 | -2.208207 | 1.506398  | H | -5.455065 | -2.010981 | -1.490543 |
| H             | -3.109753 | -1.844348 | 1.751839  | H | -5.491759 | -0.777477 | -0.215936 |
| H             | -4.792434 | -2.068459 | -1.675212 | H | -2.657032 | -3.237369 | -0.902929 |
| H             | -5.19214  | -0.341221 | -1.759971 | H | -1.68858  | -2.101854 | -1.862931 |
| H             | -6.033999 | -1.388647 | -0.601722 | H | -3.210913 | -2.735533 | -2.515128 |
| H             | -4.263243 | 0.011534  | 0.519221  | H | -3.527104 | -0.403135 | -1.697657 |
| H             | -3.777516 | 2.886927  | -0.692167 | H | -3.943016 | 2.623684  | -0.877417 |
| H             | 0.158752  | 4.496294  | 0.845016  | H | 0.100229  | 4.597709  | -0.400572 |
| <b>1b (3)</b> |           |           |           |   |           |           |           |
| C             | -1.474666 | 2.864786  | -0.055644 |   |           |           |           |
| C             | -1.755525 | 0.445238  | -0.267217 |   |           |           |           |
| C             | 0.372415  | 1.380947  | 0.564882  |   |           |           |           |
| C             | -0.428443 | 0.286966  | 0.21207   |   |           |           |           |



|   |           |           |           |  |  |  |  |
|---|-----------|-----------|-----------|--|--|--|--|
| C | -2.249011 | 1.755337  | -0.396407 |  |  |  |  |
| C | -0.178954 | 2.664415  | 0.422647  |  |  |  |  |
| C | 4.987548  | 0.548235  | -0.18498  |  |  |  |  |
| C | -2.587725 | -0.738865 | -0.650955 |  |  |  |  |
| C | 4.102507  | -0.035267 | -1.002425 |  |  |  |  |
| C | 1.780694  | 1.20065   | 1.083602  |  |  |  |  |
| C | 2.66663   | -2.137004 | -0.630804 |  |  |  |  |
| C | 1.77395   | -2.570634 | 0.56117   |  |  |  |  |
| C | 2.755045  | -0.574558 | -0.559847 |  |  |  |  |
| C | 2.285989  | -0.230174 | 0.871843  |  |  |  |  |
| C | 1.194407  | -1.277479 | 1.150324  |  |  |  |  |
| C | 4.400283  | -0.211025 | -2.474211 |  |  |  |  |
| C | 0.744947  | -1.386058 | 2.604453  |  |  |  |  |
| C | -3.921218 | -1.986452 | 1.029985  |  |  |  |  |
| C | -5.02943  | -1.213568 | -1.125442 |  |  |  |  |
| C | -3.990601 | -0.881813 | -0.045277 |  |  |  |  |
| O | -2.143887 | -1.62374  | -1.373623 |  |  |  |  |
| O | 0.018465  | -0.992939 | 0.325855  |  |  |  |  |
| O | -3.50619  | 1.905693  | -0.912424 |  |  |  |  |
| O | 0.624322  | 3.709537  | 0.773717  |  |  |  |  |
| H | -1.869726 | 3.870577  | -0.178362 |  |  |  |  |
| H | 5.945666  | 0.903021  | -0.557731 |  |  |  |  |
| H | 4.803028  | 0.697642  | 0.874614  |  |  |  |  |
| H | 2.452778  | 1.911967  | 0.590787  |  |  |  |  |
| H | 1.818379  | 1.452699  | 2.152851  |  |  |  |  |
| H | 3.664872  | -2.578986 | -0.543235 |  |  |  |  |
| H | 2.253849  | -2.464843 | -1.589098 |  |  |  |  |
| H | 0.96873   | -3.253415 | 0.273629  |  |  |  |  |
| H | 2.369754  | -3.07284  | 1.330973  |  |  |  |  |
| H | 2.006692  | -0.171664 | -1.257369 |  |  |  |  |
| H | 3.105041  | -0.431897 | 1.573072  |  |  |  |  |
| H | 4.373749  | -1.270096 | -2.762535 |  |  |  |  |
| H | 3.645057  | 0.297264  | -3.089233 |  |  |  |  |
| H | 5.383769  | 0.189053  | -2.739207 |  |  |  |  |
| H | 0.287784  | -0.452904 | 2.950504  |  |  |  |  |
| H | 1.59903   | -1.609542 | 3.252703  |  |  |  |  |
| H | 0.007363  | -2.188179 | 2.715334  |  |  |  |  |
| H | -3.641829 | -2.944361 | 0.578092  |  |  |  |  |
| H | -4.897003 | -2.103775 | 1.514409  |  |  |  |  |
| H | -3.184499 | -1.747784 | 1.806017  |  |  |  |  |
| H | -4.747386 | -2.124537 | -1.663432 |  |  |  |  |
| H | -5.114714 | -0.398071 | -1.851792 |  |  |  |  |
| H | -6.014829 | -1.371414 | -0.672712 |  |  |  |  |

|   |           |          |           |  |  |  |  |
|---|-----------|----------|-----------|--|--|--|--|
| H | -4.265647 | 0.057566 | 0.440636  |  |  |  |  |
| H | -3.738806 | 2.848537 | -0.924181 |  |  |  |  |
| H | 0.154171  | 4.5455   | 0.620466  |  |  |  |  |

Key transitions, oscillator strengths, and rotatory strengths in the ECD of conformers **1a (1)** at B3LYP /6-311++G(d,p) level.

| Species       | Excited State | $\Delta E(eV)^a$ | $\lambda(nm)^b$ | $f^c$  | $R_{vel}^d$ |
|---------------|---------------|------------------|-----------------|--------|-------------|
| <b>1b (1)</b> | 88 -> 90      | 4.0199           | 308.43          | 0.017  | -59.9879    |
|               | 86 -> 90      | 4.0793           | 303.93          | 0.0317 | 19.7563     |
|               | 89 -> 90      | 4.3257           | 286.62          | 0.1875 | 55.8722     |
|               | 86 -> 90      | 5.0648           | 244.79          | 0.0005 | -1.0552     |
|               | 89 -> 94      | 5.152            | 240.65          | 0.0046 | 4.9622      |
|               | 89 -> 92      | 5.2619           | 235.63          | 0.0336 | -6.8968     |
|               | 88 -> 94      | 5.2929           | 234.24          | 0.0044 | -2.5732     |
|               | 89 -> 97      | 5.4901           | 225.83          | 0.0039 | 2.329       |
|               | 89 -> 93      | 5.5531           | 223.27          | 0.0326 | -13.8888    |
|               | 89 -> 94      | 5.5813           | 222.14          | 0.0527 | -6.6385     |
|               | 88 -> 92      | 5.6373           | 219.93          | 0.0116 | 0.0207      |
|               | 89 -> 96      | 5.6975           | 217.61          | 0.0223 | -2.2737     |
|               | 88 -> 93      | 5.724            | 216.6           | 0.0078 | 7.6239      |
|               | 88 -> 97      | 5.7909           | 214.1           | 0.0013 | 3.5698      |
|               | 88 -> 93      | 5.8259           | 212.81          | 0.0066 | 4.6942      |
|               | 89 -> 98      | 5.8607           | 211.55          | 0.031  | 11.1585     |
|               | 85 -> 90      | 5.9204           | 209.42          | 0.0045 | 21.5932     |
|               | 88 -> 97      | 5.9321           | 209.01          | 0.0014 | 6.0943      |
|               | 88 -> 97      | 5.9329           | 208.98          | 0.0293 | -31.7962    |
|               | 88 -> 97      | 5.9731           | 207.57          | 0.0017 | 3.7673      |
|               | 88 -> 98      | 6.0005           | 206.62          | 0.0629 | -25.1477    |
|               | 86 -> 93      | 6.0342           | 205.47          | 0.0053 | -1.7579     |
|               | 89 -> 99      | 6.0538           | 204.8           | 0.0154 | 6.932       |
|               | 88 -> 92      | 6.0926           | 203.5           | 0.0595 | -12.2155    |
|               | 89 -> 99      | 6.161            | 201.24          | 0.1501 | 87.088      |
|               | 86 -> 92      | 6.1811           | 200.59          | 0.0271 | 9.9999      |
|               | 87 -> 92      | 6.1844           | 200.48          | 0.0571 | -19.4122    |
|               | 84 -> 9       | 6.2138           | 199.53          | 0.0577 | -115.5774   |
|               | 88 ->100      | 6.2225           | 199.25          | 0.1151 | -25.2682    |
|               | 87 -> 91      | 6.2384           | 198.74          | 0.0899 | 4.1021      |
|               | 89 ->101      | 6.2698           | 197.75          | 0.0387 | 9.2185      |
|               | 89 -> 99      | 6.306            | 196.61          | 0.0558 | -16.1767    |
|               | 88 -> 99      | 6.323            | 196.09          | 0.0747 | -12.4851    |
|               | 89 ->101      | 6.3314           | 195.82          | 0.1566 | 45.7312     |
|               | 87 -> 97      | 6.3943           | 193.9           | 0.0126 | 8.0745      |
|               | 86 -> 98      | 6.4053           | 193.57          | 0.0202 | -5.7307     |

|  |          |        |        |        |          |
|--|----------|--------|--------|--------|----------|
|  | 86 -> 94 | 6.4164 | 193.23 | 0.0032 | 0.2214   |
|  | 86 -> 97 | 6.4219 | 193.07 | 0.0028 | -1.9326  |
|  | 88 ->101 | 6.4359 | 192.64 | 0.0363 | -11.3067 |
|  | 86 -> 93 | 6.5418 | 189.53 | 0.0005 | 1.455    |

<sup>a</sup>Excitation energy. <sup>b</sup>Wavelength. <sup>c</sup>Oscillator strength. <sup>d</sup>Rotatory strength in velocity form ( $10^{-40}$ cgs.).

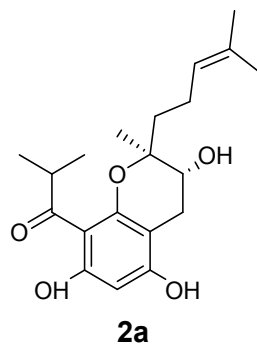

Optimized geometries of predominant conformers for compound **2a** at the B3LYP/6-31G (d,p) level in methanol solution.

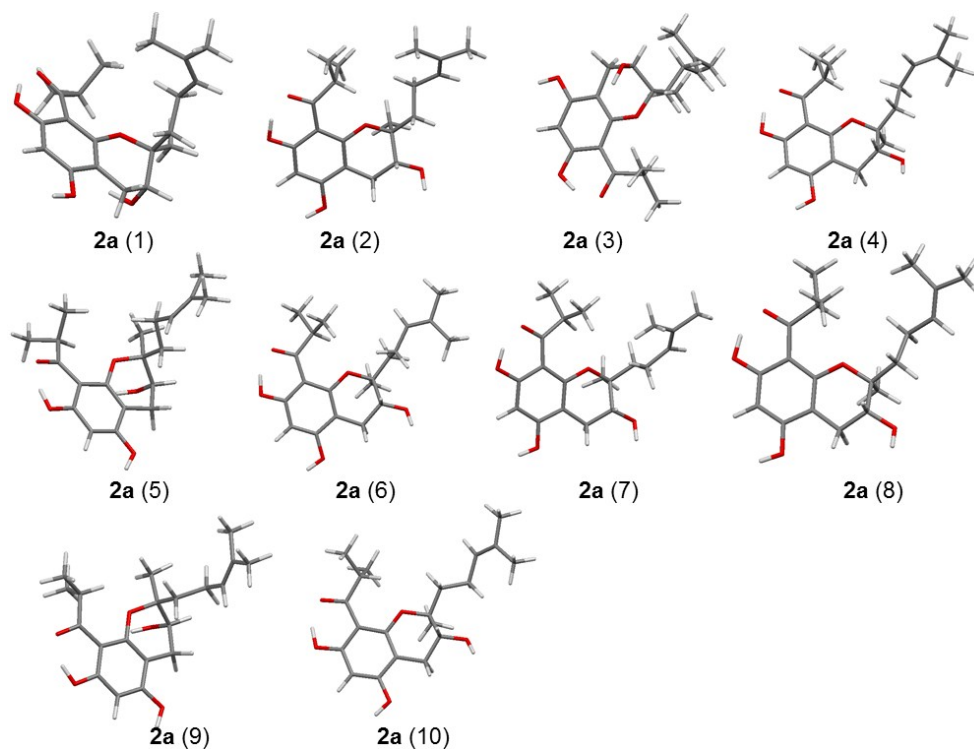

Important thermodynamic parameters (a.u.) and Boltzmann distributions of the optimized compound **2a** at B3LYP/6-31G(d,p) level in methanol solution.

| Conformations | E+ZPE        | G            | %      |
|---------------|--------------|--------------|--------|
| <b>2a (1)</b> | -1154.665845 | -1154.723759 | 18.10% |
| <b>2a (2)</b> | -1154.664538 | -1154.723920 | 1.20%  |
| <b>2a (3)</b> | -1154.666434 | -1154.721195 | 21.47% |
| <b>2a (4)</b> | -1154.665194 | -1154.721751 | 2.16%  |
| <b>2a (5)</b> | -1154.665818 | -1154.723254 | 10.61% |

|                |              |              |        |
|----------------|--------------|--------------|--------|
| <b>2a</b> (6)  | -1154.666594 | -1154.723604 | 15.36% |
| <b>2a</b> (7)  | -1154.666080 | -1154.722340 | 4.03%  |
| <b>2a</b> (8)  | -1154.664929 | -1154.721973 | 2.73%  |
| <b>2a</b> (9)  | -1154.666307 | -1154.723578 | 14.95% |
| <b>2a</b> (10) | -1154.665295 | -1154.723139 | 9.39%  |

E+ZPE, G: total energy with zero point energy (ZPE) and Gibbs free energy in methanol solution at B3LYP/6-31G (d,p) level. %: Boltzmann distributions, using the relative Gibbs free energies as weighting factors.

Optimized Z-matrixes of compound **2a** in methanol solution (Å) at B3LYP/6-31G (d,p) level.

| <b>2a</b> (1) |           |           |           | <b>2a</b> (2) |           |           |           |
|---------------|-----------|-----------|-----------|---------------|-----------|-----------|-----------|
| C             | -2.093885 | 1.096032  | -2.510522 | C             | 4.257628  | 0.165307  | -0.34937  |
| C             | -1.65391  | -0.493694 | -0.674791 | C             | 2.000141  | 1.154788  | -0.118603 |
| C             | -0.840294 | 1.846515  | -0.544124 | C             | 2.3121    | -1.307269 | -0.190852 |
| C             | -0.922854 | 0.554789  | -0.022652 | C             | 1.48255   | -0.189501 | -0.079197 |
| C             | -2.187088 | -0.187822 | -1.970364 | C             | 3.42553   | 1.281755  | -0.267139 |
| C             | -1.445558 | 2.094038  | -1.793402 | C             | 3.700415  | -1.104729 | -0.313101 |
| C             | 3.961034  | -0.402223 | 0.056486  | C             | -4.287022 | -0.745182 | 0.233821  |
| C             | -1.958698 | -1.809993 | -0.101174 | C             | 1.214698  | 2.395091  | -0.02744  |
| C             | 4.212539  | -1.075631 | -1.077963 | C             | -5.07221  | 0.129163  | -0.415849 |
| C             | -0.126038 | 2.960556  | 0.18874   | C             | 1.759451  | -2.710722 | -0.212404 |
| C             | 0.175043  | 2.566455  | 1.637327  | C             | 0.259137  | -2.705936 | -0.482257 |
| C             | 0.731254  | 1.125291  | 1.69683   | C             | -0.454985 | -1.640585 | 0.375709  |
| C             | 5.549073  | -0.944902 | -1.771405 | C             | -6.491487 | -0.237115 | -0.785202 |
| C             | 3.242161  | -2.003924 | -1.76821  | C             | -4.65935  | 1.518756  | -0.836853 |
| C             | 0.906814  | 0.657017  | 3.139024  | C             | -0.28174  | -1.888634 | 1.876183  |
| C             | -0.64421  | -3.079743 | 1.615989  | C             | -0.901283 | 3.744017  | -0.32612  |
| C             | -3.153028 | -2.790155 | 1.873693  | C             | -0.529443 | 2.324982  | 1.744269  |
| C             | 2.703209  | -0.392891 | 0.886531  | C             | -2.856935 | -0.582904 | 0.685052  |
| C             | 2.027583  | 0.994235  | 0.868789  | C             | -1.929397 | -1.562275 | -0.061583 |
| C             | -1.844848 | -2.140544 | 1.387805  | C             | -0.289823 | 2.447423  | 0.222177  |
| O             | -2.409136 | -2.719652 | -0.836337 | O             | 1.793724  | 3.505155  | -0.110985 |
| O             | -0.297655 | 0.232314  | 1.145095  | O             | 0.13382   | -0.337999 | 0.042463  |
| O             | -2.818778 | -1.110884 | -2.711996 | O             | 4.033249  | 2.475759  | -0.325947 |
| O             | -1.335376 | 3.362119  | -2.265812 | O             | 4.462602  | -2.22556  | -0.401033 |
| O             | -0.98019  | 2.715567  | 2.465002  | O             | -0.332655 | -3.969461 | -0.189381 |
| H             | -2.526179 | 1.288894  | -3.487556 | H             | 5.328182  | 0.315032  | -0.448213 |
| H             | 4.755335  | 0.24134   | 0.441037  | H             | -4.717642 | -1.721545 | 0.467361  |
| H             | 0.800555  | 3.236922  | -0.331097 | H             | 2.268992  | -3.29787  | -0.985661 |
| H             | -0.746459 | 3.862927  | 0.199982  | H             | 1.949819  | -3.229119 | 0.737079  |
| H             | 0.917035  | 3.247575  | 2.063776  | H             | 0.082738  | -2.43913  | -1.535577 |
| H             | 6.04745   | -1.921011 | -1.855473 | H             | -7.210301 | 0.462149  | -0.33502  |
| H             | 5.426582  | -0.572006 | -2.798119 | H             | -6.644178 | -0.178773 | -1.87219  |
| H             | 6.221465  | -0.264095 | -1.239578 | H             | -6.751067 | -1.249136 | -0.458438 |

|               |           |           |           |               |           |           |           |
|---------------|-----------|-----------|-----------|---------------|-----------|-----------|-----------|
| H             | 3.049257  | -1.663253 | -2.794963 | H             | -4.77499  | 1.642169  | -1.922574 |
| H             | 3.667643  | -3.013484 | -1.85386  | H             | -5.307307 | 2.27399   | -0.37043  |
| H             | 2.280142  | -2.087312 | -1.257447 | H             | -3.625086 | 1.759407  | -0.581266 |
| H             | 1.130411  | -0.411753 | 3.177922  | H             | -0.776095 | -1.107228 | 2.458116  |
| H             | -0.002518 | 0.849378  | 3.711388  | H             | 0.774783  | -1.896508 | 2.158124  |
| H             | 1.734017  | 1.201112  | 3.607423  | H             | -0.716395 | -2.855203 | 2.145966  |
| H             | -0.765682 | -4.005354 | 1.042344  | H             | -0.486293 | 4.62493   | 0.17139   |
| H             | -0.569745 | -3.341067 | 2.677447  | H             | -1.984821 | 3.735277  | -0.163141 |
| H             | 0.297006  | -2.608358 | 1.316302  | H             | -0.720859 | 3.848341  | -1.401603 |
| H             | -3.355534 | -3.721045 | 1.336376  | H             | -0.048388 | 3.155357  | 2.274338  |
| H             | -4.009223 | -2.120795 | 1.730757  | H             | -0.135639 | 1.385587  | 2.142144  |
| H             | -3.076502 | -3.015776 | 2.94311   | H             | -1.602904 | 2.362332  | 1.959283  |
| H             | 1.989657  | -1.14528  | 0.53869   | H             | -2.507404 | 0.443014  | 0.546904  |
| H             | 2.962862  | -0.659358 | 1.919642  | H             | -2.811598 | -0.786293 | 1.763578  |
| H             | 1.819011  | 1.255524  | -0.173357 | H             | -1.945788 | -1.318882 | -1.131642 |
| H             | 2.73413   | 1.747951  | 1.242204  | H             | -2.331932 | -2.576953 | 0.031103  |
| H             | -1.677725 | -1.223864 | 1.950867  | H             | -0.756874 | 1.594636  | -0.268852 |
| H             | -2.757235 | -1.964706 | -2.189495 | H             | 3.293503  | 3.154961  | -0.258982 |
| H             | -1.788579 | 3.430043  | -3.122865 | H             | 5.396028  | -1.974849 | -0.503997 |
| H             | -1.657899 | 2.100713  | 2.137291  | H             | 0.087734  | -4.627419 | -0.76617  |
| <b>2a (3)</b> |           |           |           | <b>2a (4)</b> |           |           |           |
| C             | -2.064135 | 2.813502  | -0.895382 | C             | 4.35329   | -0.401055 | -0.016062 |
| C             | -2.250542 | 0.375195  | -0.527324 | C             | 2.288008  | 0.962151  | 0.003715  |
| C             | -0.385638 | 1.677933  | 0.474758  | C             | 2.178271  | -1.517197 | -0.079595 |
| C             | -1.054848 | 0.471397  | 0.262896  | C             | 1.548031  | -0.272173 | -0.037258 |
| C             | -2.73887  | 1.606533  | -1.084883 | C             | 3.72123   | 0.842459  | -0.001073 |
| C             | -0.906089 | 2.839508  | -0.129477 | C             | 3.585559  | -1.556901 | -0.052672 |
| C             | 4.020641  | -1.236553 | -0.767192 | C             | -4.090438 | 0.435688  | -0.409974 |
| C             | -2.987439 | -0.860248 | -0.835731 | C             | 1.717823  | 2.316057  | 0.070942  |
| C             | 4.947689  | -0.466378 | -1.359329 | C             | -5.380766 | 0.258652  | -0.082529 |
| C             | 0.850512  | 1.763981  | 1.342089  | C             | 1.394642  | -2.802804 | -0.181822 |
| C             | 1.01069   | 0.516595  | 2.214431  | C             | -0.050532 | -2.540961 | -0.595482 |
| C             | 0.76302   | -0.753581 | 1.375283  | C             | -0.646296 | -1.359019 | 0.19635   |
| C             | 5.651227  | -0.935573 | -2.612063 | C             | -6.481314 | 0.710875  | -1.014583 |
| C             | 5.386826  | 0.893783  | -0.872898 | C             | -5.871778 | -0.379172 | 1.19489   |
| C             | 0.760162  | -2.01406  | 2.236662  | C             | -0.660728 | -1.610621 | 1.706193  |
| C             | -3.023316 | -3.324194 | -1.386368 | C             | -0.320934 | 2.64179   | -1.332653 |
| C             | -3.158162 | -2.524168 | 1.01809   | C             | -0.055574 | 3.949743  | 0.825538  |
| C             | 3.212806  | -0.952725 | 0.4735    | C             | -2.858151 | 0.054329  | 0.36987   |
| C             | 1.701811  | -0.890867 | 0.157597  | C             | -2.034548 | -1.016048 | -0.373912 |
| C             | -2.56384  | -2.256674 | -0.38289  | C             | 0.222766  | 2.618884  | 0.11363   |
| O             | -4.04731  | -0.796797 | -1.503375 | O             | 2.480385  | 3.312482  | 0.07437   |
| O             | -0.615485 | -0.670211 | 0.865256  | O             | 0.189892  | -0.184994 | -0.079688 |

|               |           |           |           |               |           |           |           |
|---------------|-----------|-----------|-----------|---------------|-----------|-----------|-----------|
| O             | -3.855742 | 1.658946  | -1.825333 | O             | 4.526125  | 1.915145  | 0.020768  |
| O             | -0.216111 | 3.987709  | 0.09208   | O             | 4.148803  | -2.792601 | -0.077467 |
| O             | 0.143593  | 0.560337  | 3.349419  | O             | -0.876741 | -3.680293 | -0.367912 |
| H             | -2.465024 | 3.714386  | -1.349498 | H             | 5.438287  | -0.438218 | -0.005482 |
| H             | 3.798408  | -2.198924 | -1.232962 | H             | -3.881003 | 0.906923  | -1.372879 |
| H             | 1.745951  | 1.909135  | 0.722478  | H             | 1.869767  | -3.470131 | -0.910735 |
| H             | 0.792339  | 2.638332  | 1.998316  | H             | 1.397228  | -3.345598 | 0.773087  |
| H             | 2.019299  | 0.481943  | 2.634365  | H             | -0.077419 | -2.258981 | -1.659308 |
| H             | 5.491245  | -0.232093 | -3.441258 | H             | -7.123784 | -0.132277 | -1.305565 |
| H             | 6.738231  | -0.988422 | -2.457784 | H             | -7.137767 | 1.443621  | -0.524251 |
| H             | 5.304428  | -1.923506 | -2.931565 | H             | -6.08379  | 1.167019  | -1.926911 |
| H             | 6.462495  | 0.894472  | -0.648166 | H             | -6.5023   | 0.321783  | 1.759565  |
| H             | 5.235499  | 1.648791  | -1.656636 | H             | -6.503914 | -1.249863 | 0.971701  |
| H             | 4.857681  | 1.229141  | 0.022029  | H             | -5.066234 | -0.711162 | 1.853978  |
| H             | 0.523107  | -2.891496 | 1.627031  | H             | -1.05285  | -0.739435 | 2.236763  |
| H             | 0.025212  | -1.926258 | 3.038757  | H             | 0.344373  | -1.8106   | 2.087601  |
| H             | 1.743368  | -2.164716 | 2.692163  | H             | -1.292283 | -2.474079 | 1.933678  |
| H             | -4.113513 | -3.357586 | -1.466156 | H             | 0.174954  | 3.426943  | -1.915554 |
| H             | -2.670718 | -4.308402 | -1.058324 | H             | -1.395739 | 2.854658  | -1.322567 |
| H             | -2.617808 | -3.134949 | -2.386507 | H             | -0.169086 | 1.683541  | -1.836613 |
| H             | -4.253147 | -2.481428 | 0.98406   | H             | 0.398971  | 4.79103   | 0.295139  |
| H             | -2.803092 | -1.796528 | 1.753023  | H             | 0.335195  | 3.946291  | 1.849035  |
| H             | -2.867145 | -3.523433 | 1.360621  | H             | -1.137355 | 4.116907  | 0.875669  |
| H             | 3.397246  | -1.753404 | 1.203393  | H             | -2.240374 | 0.950747  | 0.513418  |
| H             | 3.537995  | -0.021734 | 0.947569  | H             | -3.122035 | -0.305308 | 1.368453  |
| H             | 1.408639  | -1.806807 | -0.371169 | H             | -1.889059 | -0.703798 | -1.416279 |
| H             | 1.520695  | -0.064848 | -0.538603 | H             | -2.608106 | -1.94797  | -0.405125 |
| H             | -1.477998 | -2.287947 | -0.300782 | H             | -0.278156 | 1.815077  | 0.651714  |
| H             | -4.199857 | 0.714468  | -1.85613  | H             | 3.910423  | 2.710866  | 0.034447  |
| H             | -0.670417 | 4.729189  | -0.342093 | H             | 5.11689   | -2.707238 | -0.078053 |
| H             | -0.769705 | 0.522313  | 3.018843  | H             | -0.523913 | -4.406738 | -0.906579 |
| <b>2a (5)</b> |           |           |           | <b>2a (6)</b> |           |           |           |
| C             | 2.771371  | -1.74893  | -1.747691 | C             | 4.027156  | -1.058338 | -0.776186 |
| C             | 2.005914  | 0.331636  | -0.662659 | C             | 2.373991  | 0.695153  | -0.222587 |
| C             | 1.108554  | -1.869958 | 0.047027  | C             | 1.767871  | -1.711275 | -0.102621 |
| C             | 1.119821  | -0.476582 | 0.125866  | C             | 1.432698  | -0.361977 | 0.028141  |
| C             | 2.791039  | -0.356833 | -1.645505 | C             | 3.681031  | 0.288366  | -0.661657 |
| C             | 1.954223  | -2.485122 | -0.898837 | C             | 3.082225  | -2.03554  | -0.490847 |
| C             | -3.549769 | 0.264346  | -1.177913 | C             | -3.971826 | 0.770963  | -0.416383 |
| C             | 2.224858  | 1.77368   | -0.497598 | C             | 2.13455   | 2.132349  | -0.025373 |
| C             | -4.880703 | 0.424055  | -1.260609 | C             | -5.253135 | 0.471002  | -0.684404 |
| C             | 0.22522   | -2.714158 | 0.938641  | C             | 0.755971  | -2.808663 | 0.132317  |
| C             | -0.340261 | -1.885533 | 2.094553  | C             | -0.665007 | -2.250048 | 0.131492  |

|               |           |           |           |               |           |           |           |
|---------------|-----------|-----------|-----------|---------------|-----------|-----------|-----------|
| C             | -0.862241 | -0.527042 | 1.571987  | C             | -0.742694 | -0.965976 | 0.975247  |
| C             | -5.622731 | 0.062768  | -2.526818 | C             | -6.331838 | 1.523495  | -0.569357 |
| C             | -5.760092 | 0.960466  | -0.156764 | C             | -5.75318  | -0.886904 | -1.115623 |
| C             | -1.305942 | 0.375082  | 2.720996  | C             | -0.317661 | -1.182884 | 2.432109  |
| C             | 0.604156  | 3.470674  | 0.382169  | C             | -0.115121 | 3.05232   | -0.583551 |
| C             | 2.989026  | 3.405335  | 1.246741  | C             | 1.170042  | 3.97854   | 1.399183  |
| C             | -2.63564  | 0.558274  | -0.016473 | C             | -2.762624 | -0.126705 | -0.466844 |
| C             | -1.967781 | -0.72742  | 0.513393  | C             | -2.130636 | -0.304628 | 0.928505  |
| C             | 1.801447  | 2.567907  | 0.738883  | C             | 0.857856  | 2.723918  | 0.569978  |
| O             | 2.854784  | 2.411308  | -1.373961 | O             | 3.017746  | 2.959189  | -0.358037 |
| O             | 0.273653  | 0.182546  | 0.966408  | O             | 0.164516  | 0.004414  | 0.35861   |
| O             | 3.596451  | 0.299567  | -2.494763 | O             | 4.638723  | 1.177611  | -0.963547 |
| O             | 1.904425  | -3.841099 | -0.946795 | O             | 3.367108  | -3.35995  | -0.58828  |
| O             | 0.627834  | -1.712606 | 3.130648  | O             | -1.612031 | -3.172381 | 0.663126  |
| H             | 3.394478  | -2.230905 | -2.494682 | H             | 5.032844  | -1.315645 | -1.093622 |
| H             | -3.041291 | -0.14191  | -2.055079 | H             | -3.754147 | 1.795778  | -0.107198 |
| H             | -0.590818 | -3.169383 | 0.362688  | H             | 0.850809  | -3.575654 | -0.645618 |
| H             | 0.80001   | -3.546141 | 1.358691  | H             | 0.940258  | -3.318391 | 1.087806  |
| H             | -1.168552 | -2.419566 | 2.569122  | H             | -0.93477  | -1.980733 | -0.898927 |
| H             | -6.387831 | -0.701814 | -2.33125  | H             | -6.852251 | 1.662513  | -1.52758  |
| H             | -6.154778 | 0.93379   | -2.934881 | H             | -7.099849 | 1.223957  | 0.15775   |
| H             | -4.949753 | -0.31853  | -3.301465 | H             | -5.927502 | 2.492107  | -0.258221 |
| H             | -6.277082 | 1.873527  | -0.483436 | H             | -6.520342 | -1.252848 | -0.419219 |
| H             | -6.546021 | 0.234892  | 0.094496  | H             | -6.235982 | -0.826715 | -2.101051 |
| H             | -5.214081 | 1.193926  | 0.760108  | H             | -4.965838 | -1.641922 | -1.173325 |
| H             | -1.506678 | 1.389212  | 2.366818  | H             | -0.465973 | -0.263046 | 3.006649  |
| H             | -0.532133 | 0.415973  | 3.489917  | H             | 0.735842  | -1.46623  | 2.508648  |
| H             | -2.222238 | -0.022264 | 3.170835  | H             | -0.921115 | -1.976832 | 2.880811  |
| H             | 0.873113  | 4.163177  | -0.423211 | H             | 0.32709   | 3.794421  | -1.258508 |
| H             | 0.305053  | 4.059659  | 1.256269  | H             | -1.045108 | 3.468631  | -0.18061  |
| H             | -0.259832 | 2.8825    | 0.057624  | H             | -0.364971 | 2.160344  | -1.165175 |
| H             | 3.325353  | 4.114467  | 0.485186  | H             | 1.620373  | 4.762569  | 0.784293  |
| H             | 3.839044  | 2.769605  | 1.520286  | H             | 1.860377  | 3.754321  | 2.220249  |
| H             | 2.68813   | 3.96809   | 2.137398  | H             | 0.243195  | 4.369125  | 1.833969  |
| H             | -1.847349 | 1.247771  | -0.349603 | H             | -3.01657  | -1.106242 | -0.881927 |
| H             | -3.172884 | 1.063779  | 0.790402  | H             | -2.015672 | 0.318748  | -1.138943 |
| H             | -1.550123 | -1.275128 | -0.338528 | H             | -2.803912 | -0.901203 | 1.553123  |
| H             | -2.736744 | -1.377368 | 0.951196  | H             | -2.037833 | 0.674578  | 1.415521  |
| H             | 1.494619  | 1.880082  | 1.524962  | H             | 0.3859    | 1.981185  | 1.211175  |
| H             | 3.454831  | 1.273682  | -2.301394 | H             | 4.217697  | 2.080291  | -0.824028 |
| H             | 2.522299  | -4.165545 | -1.623326 | H             | 4.287409  | -3.473871 | -0.879526 |
| H             | 1.381277  | -1.229185 | 2.752212  | H             | -1.586476 | -3.969296 | 0.109277  |
| <b>2a (7)</b> |           |           |           | <b>2a (8)</b> |           |           |           |

|   |           |           |           |   |           |           |           |
|---|-----------|-----------|-----------|---|-----------|-----------|-----------|
| C | 4.015677  | -0.229195 | -0.95459  | C | 4.285672  | 0.25253   | -0.114948 |
| C | 2.024166  | 1.015393  | -0.189965 | C | 1.998849  | 1.188404  | 0.025122  |
| C | 2.036137  | -1.466711 | -0.218429 | C | 2.365477  | -1.261047 | -0.143006 |
| C | 1.384779  | -0.253841 | 0.014547  | C | 1.509728  | -0.16463  | -0.023085 |
| C | 3.352656  | 0.978432  | -0.734334 | C | 3.427406  | 1.348063  | -0.017473 |
| C | 3.364516  | -1.42706  | -0.685542 | C | 3.753658  | -1.027657 | -0.179786 |
| C | -4.207405 | -0.669961 | -0.271512 | C | -4.259079 | -0.885475 | 0.209614  |
| C | 1.46738   | 2.326892  | 0.167694  | C | 1.179248  | 2.407062  | 0.113008  |
| C | -4.880828 | 0.318464  | -0.8821   | C | -5.12288  | 0.088531  | -0.118635 |
| C | 1.338663  | -2.792076 | -0.018973 | C | 1.842627  | -2.672476 | -0.250693 |
| C | -0.175726 | -2.60311  | 0.029391  | C | 0.344246  | -2.695096 | -0.538163 |
| C | -0.549064 | -1.428656 | 0.950965  | C | -0.402141 | -1.665287 | 0.335177  |
| C | -6.349584 | 0.538715  | -0.600972 | C | -6.500674 | -0.248265 | -0.641225 |
| C | -4.289545 | 1.280127  | -1.884519 | C | -4.847397 | 1.568094  | -0.003175 |
| C | -0.050348 | -1.619388 | 2.38809   | C | -0.232194 | -1.932707 | 1.832591  |
| C | -0.982899 | 2.802576  | 0.074102  | C | -0.766157 | 2.293857  | -1.445015 |
| C | 0.40885   | 3.684642  | 2.005208  | C | -0.922502 | 3.698368  | 0.663863  |
| C | -2.757172 | -1.055915 | -0.413484 | C | -2.852586 | -0.772741 | 0.742544  |
| C | -2.058144 | -1.128933 | 0.958064  | C | -1.875247 | -1.606071 | -0.109574 |
| C | 0.210113  | 2.527418  | 1.013164  | C | -0.344703 | 2.422873  | 0.0369    |
| O | 2.054861  | 3.372002  | -0.200622 | O | 1.738576  | 3.526062  | 0.205587  |
| O | 0.077596  | -0.22798  | 0.392358  | O | 0.160361  | -0.346519 | 0.022366  |
| O | 4.03065   | 2.098168  | -1.029149 | O | 4.012057  | 2.554195  | 0.035949  |
| O | 3.963991  | -2.629606 | -0.884281 | O | 4.541353  | -2.129223 | -0.285249 |
| O | -0.853815 | -3.759565 | 0.512218  | O | -0.218729 | -3.97897  | -0.277702 |
| H | 5.029586  | -0.20831  | -1.341851 | H | 5.357066  | 0.426204  | -0.139243 |
| H | -4.768154 | -1.296092 | 0.426402  | H | -4.601139 | -1.915242 | 0.082263  |
| H | 1.598409  | -3.477101 | -0.834571 | H | 2.377147  | -3.20653  | -1.045563 |
| H | 1.671317  | -3.278775 | 0.907976  | H | 2.033305  | -3.235198 | 0.673173  |
| H | -0.526951 | -2.351637 | -0.980751 | H | 0.170151  | -2.409964 | -1.587025 |
| H | -6.529614 | 1.550983  | -0.212109 | H | -7.283112 | 0.173151  | 0.005655  |
| H | -6.945614 | 0.451595  | -1.520489 | H | -6.660594 | 0.183598  | -1.639402 |
| H | -6.739878 | -0.179994 | 0.126772  | H | -6.660342 | -1.329209 | -0.708444 |
| H | -4.807203 | 1.195985  | -2.850362 | H | -4.954086 | 2.060423  | -0.979907 |
| H | -4.426007 | 2.318359  | -1.55156  | H | -5.579645 | 2.045036  | 0.663183  |
| H | -3.223699 | 1.120965  | -2.062301 | H | -3.850766 | 1.794594  | 0.382197  |
| H | -0.416665 | -0.806657 | 3.023303  | H | -0.720949 | -1.151705 | 2.42013   |
| H | 1.042205  | -1.625515 | 2.439171  | H | 0.823106  | -1.953611 | 2.117519  |
| H | -0.419144 | -2.568181 | 2.787715  | H | -0.676603 | -2.897917 | 2.091641  |
| H | -0.80654  | 3.711237  | -0.512935 | H | -0.376743 | 3.136142  | -2.029112 |
| H | -1.896734 | 2.945845  | 0.661388  | H | -1.858793 | 2.304511  | -1.523376 |
| H | -1.149291 | 1.970287  | -0.615838 | H | -0.403075 | 1.36363   | -1.890057 |
| H | 0.600055  | 4.627055  | 1.484692  | H | -0.595409 | 4.593355  | 0.127017  |



|               |           |           |           |                |           |           |           |
|---------------|-----------|-----------|-----------|----------------|-----------|-----------|-----------|
| H             | 1.250837  | 3.492626  | 2.679989  | H              | -0.617368 | 3.804517  | 1.710499  |
| H             | -0.493366 | 3.802422  | 2.61567   | H              | -2.017074 | 3.658612  | 0.631205  |
| H             | -2.702752 | -2.046165 | -0.887875 | H              | -2.524044 | 0.269564  | 0.789318  |
| H             | -2.218686 | -0.363169 | -1.067227 | H              | -2.839894 | -1.150426 | 1.774818  |
| H             | -2.541688 | -1.901807 | 1.566081  | H              | -1.892303 | -1.23896  | -1.143436 |
| H             | -2.197948 | -0.179453 | 1.489299  | H              | -2.230732 | -2.6419   | -0.141232 |
| H             | 0.003744  | 1.614482  | 1.569678  | H              | -0.726596 | 1.554288  | 0.572318  |
| H             | 3.402865  | 2.85389   | -0.819894 | H              | 3.256861  | 3.212953  | 0.12391   |
| H             | 4.860584  | -2.492417 | -1.233505 | H              | 5.473924  | -1.858393 | -0.323831 |
| H             | -0.649266 | -4.491504 | -0.0919   | H              | 0.220654  | -4.613846 | -0.866075 |
| <b>2a (9)</b> |           |           |           | <b>2a (10)</b> |           |           |           |
| C             | 2.88147   | -2.116748 | -1.338818 | C              | 4.14518   | -1.357368 | -0.337597 |
| C             | 2.317204  | 0.149053  | -0.523819 | C              | 2.611227  | 0.572466  | -0.131972 |
| C             | 0.939736  | -1.818567 | 0.118622  | C              | 1.740828  | -1.75305  | -0.132301 |
| C             | 1.207231  | -0.449165 | 0.164016  | C              | 1.534394  | -0.376687 | -0.040188 |
| C             | 3.15553   | -0.749951 | -1.268537 | C              | 3.931266  | 0.019794  | -0.265844 |
| C             | 1.788869  | -2.633931 | -0.655335 | C              | 3.060251  | -2.222456 | -0.277551 |
| C             | -4.082793 | -0.377086 | -0.93871  | C              | -4.510862 | 0.666712  | 0.373275  |
| C             | 2.647286  | 1.582804  | -0.553247 | C              | 2.475943  | 2.036132  | -0.133044 |
| C             | -5.123217 | 0.41432   | -1.24595  | C              | -5.611537 | 0.490576  | -0.375733 |
| C             | -0.208027 | -2.434474 | 0.88837   | C              | 0.587942  | -2.724425 | -0.089576 |
| C             | -0.745237 | -1.474645 | 1.951917  | C              | -0.748085 | -2.017355 | -0.310648 |
| C             | -0.906193 | -0.061015 | 1.355749  | C              | -0.837469 | -0.735667 | 0.540842  |
| C             | -5.780634 | 0.328117  | -2.604149 | C              | -6.582726 | 1.626999  | -0.599552 |
| C             | -5.738756 | 1.436789  | -0.321289 | C              | -6.001129 | -0.802404 | -1.051119 |
| C             | -1.307402 | 0.961207  | 2.416316  | C              | -0.717908 | -1.005664 | 2.042809  |
| C             | 1.961454  | 4.013622  | -0.589855 | C              | 1.24146   | 4.107197  | -0.880789 |
| C             | 2.318139  | 2.793835  | 1.606617  | C              | 0.73132   | 3.022826  | 1.355214  |
| C             | -3.293057 | -0.43622  | 0.34411   | C              | -3.433591 | -0.331812 | 0.711327  |
| C             | -1.828625 | 0.002568  | 0.119997  | C              | -2.058759 | 0.138879  | 0.19178   |
| C             | 1.833212  | 2.671473  | 0.144291  | C              | 1.141212  | 2.780167  | -0.114084 |
| O             | 3.669345  | 1.968732  | -1.169143 | O              | 3.504931  | 2.753966  | -0.147706 |
| O             | 0.434662  | 0.373667  | 0.930171  | O              | 0.283438  | 0.123522  | 0.133152  |
| O             | 4.233089  | -0.323598 | -1.943397 | O              | 5.023276  | 0.796114  | -0.333149 |
| O             | 1.482694  | -3.956298 | -0.684726 | O              | 3.209936  | -3.570403 | -0.349874 |
| O             | 0.098107  | -1.449961 | 3.105419  | O              | -1.840249 | -2.866923 | 0.032536  |
| H             | 3.53625   | -2.752814 | -1.926645 | H              | 5.161361  | -1.725587 | -0.43942  |
| H             | -3.735602 | -1.068288 | -1.709479 | H              | -4.352522 | 1.660389  | 0.799065  |
| H             | -1.016238 | -2.729152 | 0.204997  | H              | 0.723392  | -3.496331 | -0.856947 |
| H             | 0.119451  | -3.353513 | 1.384887  | H              | 0.549669  | -3.254842 | 0.871711  |
| H             | -1.711785 | -1.827974 | 2.320195  | H              | -0.825082 | -1.706552 | -1.363687 |
| H             | -6.846799 | 0.077585  | -2.511417 | H              | -6.693477 | 1.846671  | -1.670918 |
| H             | -5.734997 | 1.294336  | -3.126063 | H              | -7.58618  | 1.367714  | -0.233003 |

|   |           |           |           |   |           |           |           |
|---|-----------|-----------|-----------|---|-----------|-----------|-----------|
| H | -5.307479 | -0.426056 | -3.24108  | H | -6.263209 | 2.544574  | -0.095026 |
| H | -5.71143  | 2.434592  | -0.780499 | H | -6.974985 | -1.1539   | -0.68215  |
| H | -6.798927 | 1.208515  | -0.143874 | H | -6.118929 | -0.65112  | -2.133135 |
| H | -5.242665 | 1.501715  | 0.649796  | H | -5.276088 | -1.605455 | -0.901    |
| H | -1.347897 | 1.965221  | 1.982678  | H | -0.871954 | -0.080974 | 2.60798   |
| H | -0.594298 | 0.956776  | 3.242706  | H | 0.270503  | -1.399413 | 2.296548  |
| H | -2.295337 | 0.718642  | 2.819184  | H | -1.466401 | -1.737385 | 2.357743  |
| H | 2.994059  | 4.373782  | -0.591428 | H | 1.976087  | 4.777706  | -0.426467 |
| H | 1.335626  | 4.762475  | -0.091667 | H | 0.266275  | 4.6067    | -0.874418 |
| H | 1.630776  | 3.934038  | -1.631349 | H | 1.532085  | 3.945459  | -1.924895 |
| H | 3.377083  | 3.075976  | 1.637262  | H | 1.479306  | 3.641495  | 1.864796  |
| H | 2.190838  | 1.856209  | 2.154505  | H | 0.62527   | 2.083185  | 1.904441  |
| H | 1.744128  | 3.570549  | 2.124003  | H | -0.228664 | 3.55      | 1.391887  |
| H | -3.753991 | 0.181839  | 1.119831  | H | -3.384036 | -0.43667  | 1.804744  |
| H | -3.311769 | -1.469794 | 0.718421  | H | -3.655376 | -1.323093 | 0.31422   |
| H | -1.820887 | 1.039741  | -0.236364 | H | -1.853023 | 1.138618  | 0.595302  |
| H | -1.395241 | -0.600713 | -0.685837 | H | -2.101189 | 0.24641   | -0.899527 |
| H | 0.785753  | 2.372356  | 0.160519  | H | 0.379669  | 2.156874  | -0.580867 |
| H | 4.27117   | 0.668923  | -1.785727 | H | 4.685083  | 1.739847  | -0.253096 |
| H | 2.138039  | -4.429536 | -1.224332 | H | 4.150842  | -3.786932 | -0.461012 |
| H | 0.941843  | -1.04768  | 2.838417  | H | -1.792818 | -3.64676  | -0.544038 |

Key transitions, oscillator strengths, and rotatory strengths in the ECD of conformers **2a** (3) at B3LYP /6-311++G(d,p) level.

| Species       | Excited State | $\Delta E(eV)^a$ | $\lambda(nm)^b$ | $f^c$  | $R_{vel}^d$ |
|---------------|---------------|------------------|-----------------|--------|-------------|
| <b>2a</b> (3) | 92 -> 97      | 3.7469           | 330.9           | 0.0712 | 11.6899     |
|               | 91 ->106      | 4.1588           | 298.12          | 0.0014 | 3.0508      |
|               | 94 -> 97      | 4.316            | 287.27          | 0.0513 | 16.2671     |
|               | 93 -> 95      | 4.4985           | 275.61          | 0.3459 | 8.166       |
|               | 94 -> 99      | 5.2052           | 238.19          | 0.0058 | 0.0829      |
|               | 93 -> 97      | 5.2535           | 236             | 0.0032 | 4.7223      |
|               | 93 -> 97      | 5.4987           | 225.48          | 0.1074 | -9.7329     |
|               | 93 ->100      | 5.5233           | 224.47          | 0.0101 | 5.7499      |
|               | 94 -> 99      | 5.5875           | 221.9           | 0.0272 | -13.6235    |
|               | 92 -> 97      | 5.6153           | 220.8           | 0.0354 | -19.1975    |
|               | 93 -> 96      | 5.6392           | 219.86          | 0.0003 | 1.0407      |
|               | 89 -> 95      | 5.7168           | 216.88          | 0.0095 | 1.6304      |
|               | 94 -> 99      | 5.7663           | 215.01          | 0.0193 | 1.2329      |
|               | 93 -> 97      | 5.8327           | 212.57          | 0.1117 | -110.0444   |
|               | 93 -> 96      | 5.9076           | 209.87          | 0.0131 | -14.4686    |
|               | 93 -> 99      | 5.9297           | 209.09          | 0.0473 | -1.0213     |
|               | 93 -> 98      | 5.9471           | 208.48          | 0.0451 | 39.8988     |
|               | 94 -> 99      | 5.9861           | 207.12          | 0.0117 | 8.8114      |

|  |          |        |        |        |           |
|--|----------|--------|--------|--------|-----------|
|  | 94 ->101 | 6.0176 | 206.04 | 0.0114 | 10.1219   |
|  | 93 ->100 | 6.034  | 205.48 | 0.0002 | 0.0822    |
|  | 92 -> 97 | 6.0734 | 204.14 | 0.0077 | 3.5274    |
|  | 92 -> 98 | 6.0761 | 204.05 | 0.0059 | 8.5484    |
|  | 93 ->100 | 6.1107 | 202.9  | 0.0032 | -0.4824   |
|  | 93 ->101 | 6.1488 | 201.64 | 0.0035 | -6.4037   |
|  | 94 ->103 | 6.2123 | 199.58 | 0.0137 | 9.378     |
|  | 94 ->105 | 6.2245 | 199.19 | 0.0359 | 40.7268   |
|  | 94 ->102 | 6.2422 | 198.62 | 0.0098 | 10.5549   |
|  | 91 -> 99 | 6.2706 | 197.72 | 0.0007 | -2.1583   |
|  | 93 -> 96 | 6.3124 | 196.41 | 0.2346 | 204.466   |
|  | 92 -> 98 | 6.3457 | 195.38 | 0.0583 | 17.0626   |
|  | 93 ->101 | 6.3749 | 194.49 | 0.1572 | -139.9957 |
|  | 92 ->100 | 6.4185 | 193.17 | 0.0082 | -0.957    |
|  | 93 ->103 | 6.4277 | 192.89 | 0.0554 | -13.8562  |
|  | 93 ->103 | 6.4408 | 192.5  | 0.0133 | 21.335    |
|  | 94 ->110 | 6.4684 | 191.68 | 0.0971 | 70.286    |
|  | 93 ->103 | 6.4772 | 191.42 | 0.0278 | -57.4108  |
|  | 84 -> 95 | 6.5113 | 190.42 | 0.0234 | -16.8602  |
|  | 93 ->105 | 6.5568 | 189.09 | 0.0147 | -14.5178  |
|  | 93 ->104 | 6.6013 | 187.82 | 0.012  | -15.2854  |
|  | 94 ->111 | 6.6096 | 187.58 | 0.0023 | -3.2513   |

<sup>a</sup>Excitation energy. <sup>b</sup>Wavelength. <sup>c</sup>Oscillator strength. <sup>d</sup>Rotatory strength in velocity form ( $10^{-40}$ cgs.).

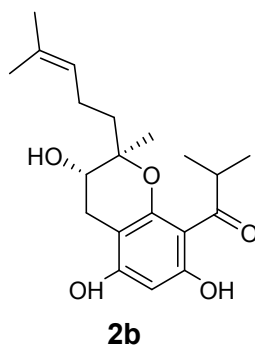

Optimized geometries of predominant conformers for compound **2b** at the B3LYP/6-31G (d,p) level in methanol solution.

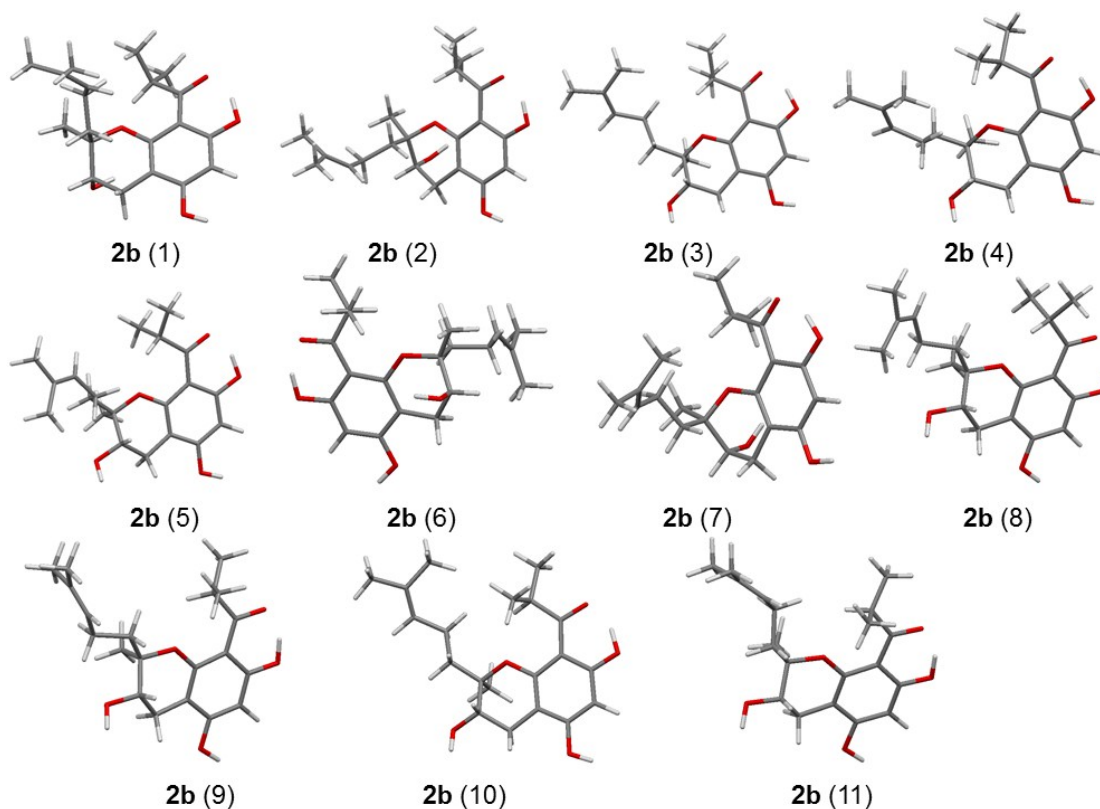

Important thermodynamic parameters (a.u.) and Boltzmann distributions of the optimized compound **2b** at B3LYP/6-31G(d,p) level in methanol solution.

| Conformations  | E+ZPE        | G            | %      |
|----------------|--------------|--------------|--------|
| <b>2b (1)</b>  | -1154.665820 | -1154.723263 | 9.26%  |
| <b>2b (2)</b>  | -1154.666309 | -1154.723587 | 13.05% |
| <b>2b (3)</b>  | -1154.664541 | -1154.721202 | 1.04%  |
| <b>2b (4)</b>  | -1154.666078 | -1154.722336 | 3.47%  |
| <b>2b (5)</b>  | -1154.666733 | -1154.724088 | 22.19% |
| <b>2b (6)</b>  | -1154.666434 | -1154.723920 | 18.57% |
| <b>2b (7)</b>  | -1154.666457 | -1154.723650 | 13.95% |
| <b>2b (8)</b>  | -1154.665296 | -1154.723141 | 8.14%  |
| <b>2b (9)</b>  | -1154.665294 | -1154.722958 | 6.71%  |
| <b>2b (10)</b> | -1154.664872 | -1154.721693 | 1.76%  |
| <b>2b (11)</b> | -1154.665193 | -1154.721746 | 1.86%  |

E+ZPE, G: total energy with zero point energy (ZPE) and Gibbs free energy in methanol solution at B3LYP/6-31G (d,p) level. %: Boltzmann distributions, using the relative Gibbs free energies as weighting factors.

Optimized Z-matrixes of compound **2b** in methanol solution (Å) at B3LYP/6-31G (d,p) level.

| <b>2b (1)</b> |           |           |           | <b>2b (2)</b> |           |           |           |
|---------------|-----------|-----------|-----------|---------------|-----------|-----------|-----------|
| C             | -2.773941 | -1.747107 | -1.747337 | C             | -2.881704 | -2.116066 | -1.33936  |
| C             | -2.006461 | 0.332773  | -0.662341 | C             | -2.317028 | 0.149453  | -0.523838 |
| C             | -1.110105 | -1.869586 | 0.046351  | C             | -0.94006  | -1.818641 | 0.118343  |
| C             | -1.120311 | -0.476214 | 0.125482  | C             | -1.207245 | -0.449176 | 0.163993  |

|   |           |           |           |   |           |           |           |
|---|-----------|-----------|-----------|---|-----------|-----------|-----------|
| C | -2.792653 | -0.355012 | -1.644804 | C | -3.155443 | -0.749224 | -1.268869 |
| C | -1.956773 | -2.483989 | -0.899131 | C | -1.789308 | -2.633651 | -0.655842 |
| C | 3.551354  | 0.261698  | -1.176998 | C | 4.082786  | -0.37728  | -0.938873 |
| C | -2.224353 | 1.774903  | -0.496894 | C | -2.6469   | 1.583277  | -0.55288  |
| C | 4.882106  | 0.422692  | -1.260224 | C | 5.122936  | 0.414538  | -1.245981 |
| C | -0.226847 | -2.714562 | 0.937294  | C | 0.207554  | -2.434957 | 0.887963  |
| C | 0.338924  | -1.886603 | 2.093514  | C | 0.745131  | -1.47547  | 1.95165   |
| C | 0.861967  | -0.528374 | 1.571459  | C | 0.906344  | -0.061766 | 1.355806  |
| C | 5.624107  | 0.060969  | -2.526324 | C | 5.780156  | 0.329058  | -2.604321 |
| C | 5.761319  | 0.96106   | -0.15719  | C | 5.738288  | 1.436901  | -0.321085 |
| C | 1.305835  | 0.373211  | 2.720799  | C | 1.307686  | 0.960218  | 2.416525  |
| C | -2.985052 | 3.407656  | 1.248021  | C | -2.318015 | 2.793649  | 1.607232  |
| C | -0.60093  | 3.470107  | 0.381249  | C | -1.960546 | 4.013981  | -0.588775 |
| C | 2.637107  | 0.555961  | -0.015738 | C | 3.293125  | -0.436933 | 0.343965  |
| C | 1.967746  | -0.729313 | 0.513203  | C | 1.828683  | 0.001932  | 0.119987  |
| C | -1.798947 | 2.568797  | 0.739161  | C | -1.832728 | 2.67161   | 0.144973  |
| O | -2.854836 | 2.413013  | -1.372522 | O | -3.668886 | 1.969487  | -1.168699 |
| O | -0.273108 | 0.182257  | 0.96536   | O | -0.434567 | 0.37326   | 0.930422  |
| O | -3.598202 | 0.302068  | -2.493408 | O | -4.232809 | -0.322517 | -1.943901 |
| O | -1.907901 | -3.839998 | -0.947342 | O | -1.483467 | -3.956101 | -0.685433 |
| O | -0.629313 | -1.713393 | 3.129458  | O | -0.098004 | -1.450868 | 3.105289  |
| H | -3.397836 | -2.228479 | -2.494055 | H | -3.536545 | -2.751879 | -1.927394 |
| H | 3.043065  | -0.14587  | -2.05367  | H | 3.735709  | -1.068301 | -1.709854 |
| H | -0.801788 | -3.546589 | 1.357036  | H | -0.120118 | -3.353993 | 1.384356  |
| H | 0.588984  | -3.169722 | 0.361003  | H | 1.015659  | -2.729764 | 0.204521  |
| H | 1.166806  | -2.421243 | 2.568112  | H | 1.711667  | -1.829112 | 2.319656  |
| H | 6.155237  | 0.932121  | -2.935311 | H | 5.734255  | 1.295521  | -3.12577  |
| H | 6.389981  | -0.702725 | -2.330306 | H | 6.846386  | 0.078688  | -2.511908 |
| H | 4.95127   | -0.321633 | -3.300449 | H | 5.307032  | -0.424883 | -3.241548 |
| H | 6.548484  | 0.236819  | 0.09404   | H | 6.798893  | 1.209655  | -0.144978 |
| H | 6.276747  | 1.874714  | -0.484677 | H | 5.709379  | 2.435075  | -0.77941  |
| H | 5.215498  | 1.194265  | 0.759855  | H | 5.243153  | 1.500458  | 0.650579  |
| H | 1.507481  | 1.387255  | 2.366899  | H | 1.348456  | 1.964282  | 1.983036  |
| H | 2.221647  | -0.024894 | 3.170955  | H | 2.295503  | 0.717366  | 2.819504  |
| H | 0.531738  | 0.414554  | 3.489407  | H | 0.594469  | 0.955831  | 3.242819  |
| H | -3.321141 | 4.117225  | 0.486773  | H | -3.377011 | 3.075612  | 1.637696  |
| H | -2.682733 | 3.970028  | 2.138443  | H | -1.744275 | 3.570385  | 2.124903  |
| H | -3.835643 | 2.772999  | 1.522278  | H | -2.19066  | 1.855979  | 2.155026  |
| H | -0.869693 | 4.162665  | -0.424154 | H | -2.993033 | 4.374506  | -0.590269 |
| H | 0.262153  | 2.880848  | 0.056276  | H | -1.629894 | 3.934691  | -1.630302 |
| H | -0.300504 | 4.059089  | 1.254902  | H | -1.334477 | 4.76245   | -0.090319 |
| H | 3.174578  | 1.06045   | 0.791615  | H | 3.31182   | -1.47063  | 0.717939  |
| H | 1.849655  | 1.246495  | -0.348732 | H | 3.754065  | 0.18087   | 1.119884  |

|               |           |           |           |               |           |           |           |
|---------------|-----------|-----------|-----------|---------------|-----------|-----------|-----------|
| H             | 2.735889  | -1.380233 | 0.951014  | H             | 1.395254  | -0.60124  | -0.68589  |
| H             | 1.549862  | -1.276219 | -0.339123 | H             | 1.82098   | 1.039144  | -0.23625  |
| H             | -1.492181 | 1.880644  | 1.524979  | H             | -0.785352 | 2.372243  | 0.161443  |
| H             | -3.456014 | 1.276046  | -2.299719 | H             | -4.270996 | 0.669916  | -1.785862 |
| H             | -2.526208 | -4.163914 | -1.623738 | H             | -2.13894  | -4.429097 | -1.225107 |
| H             | -1.383016 | -1.230663 | 2.750647  | H             | -0.941784 | -1.048573 | 2.838417  |
| <b>2b (3)</b> |           |           |           | <b>2b (4)</b> |           |           |           |
| C             | -4.257667 | 0.16543   | -0.349073 | C             | -4.015691 | -0.228885 | -0.954441 |
| C             | -2.000118 | 1.154829  | -0.118642 | C             | -2.024015 | 1.015549  | -0.189971 |
| C             | -2.312164 | -1.307219 | -0.190788 | C             | -2.036161 | -1.466581 | -0.218677 |
| C             | -1.482583 | -0.189465 | -0.079276 | C             | -1.384744 | -0.25377  | 0.01449   |
| C             | -3.425516 | 1.281852  | -0.267068 | C             | -3.352597 | 0.978671  | -0.734045 |
| C             | -3.700494 | -1.104624 | -0.312794 | C             | -3.364552 | -1.426829 | -0.685698 |
| C             | 4.287051  | -0.745496 | 0.233603  | C             | 4.207226  | -0.669911 | -0.271194 |
| C             | -1.214602 | 2.39509   | -0.027649 | C             | -1.46709  | 2.327025  | 0.167798  |
| C             | 5.072216  | 0.129144  | -0.415705 | C             | 4.880631  | 0.318305  | -0.882113 |
| C             | -1.759565 | -2.710688 | -0.212507 | C             | -1.338771 | -2.792012 | -0.019271 |
| C             | -0.259244 | -2.705991 | -0.482377 | C             | 0.175613  | -2.603167 | 0.029279  |
| C             | 0.454928  | -1.640569 | 0.37549   | C             | 0.548892  | -1.428873 | 0.95107   |
| C             | 6.491402  | -0.237055 | -0.785457 | C             | 6.349347  | 0.538816  | -0.600949 |
| C             | 4.659355  | 1.519045  | -0.83575  | C             | 4.289331  | 1.279497  | -1.884961 |
| C             | 0.28171   | -1.888533 | 1.875973  | C             | 0.049978  | -1.619854 | 2.388072  |
| C             | 0.529463  | 2.324843  | 1.744213  | C             | -0.408035 | 3.684785  | 2.005026  |
| C             | 0.901461  | 3.743999  | -0.326096 | C             | 0.983243  | 2.802448  | 0.07372   |
| C             | 2.857045  | -0.583422 | 0.685163  | C             | 2.757029  | -1.055954 | -0.413149 |
| C             | 1.92934   | -1.562333 | -0.061868 | C             | 2.057981  | -1.129228 | 0.958373  |
| C             | 0.289942  | 2.447391  | 0.222127  | C             | -0.209655 | 2.527531  | 1.012979  |
| O             | -1.793539 | 3.505169  | -0.111479 | O             | -2.054555 | 3.372179  | -0.200409 |
| O             | -0.133816 | -0.338019 | 0.042126  | O             | -0.07766  | -0.22806  | 0.392601  |
| O             | -4.033179 | 2.475886  | -0.325937 | O             | -4.030691 | 2.098452  | -1.028599 |
| O             | -4.462743 | -2.225432 | -0.400527 | O             | -3.96411  | -2.629324 | -0.884494 |
| O             | 0.33244   | -3.969534 | -0.189337 | O             | 0.853587  | -3.759704 | 0.512061  |
| H             | -5.32823  | 0.315185  | -0.447783 | H             | -5.029688 | -0.207843 | -1.341455 |
| H             | 4.717629  | -1.722024 | 0.466539  | H             | 4.767971  | -1.295765 | 0.42697   |
| H             | -1.949916 | -3.229178 | 0.736924  | H             | -1.671537 | -3.278801 | 0.907585  |
| H             | -2.269179 | -3.29774  | -0.985787 | H             | -1.59847  | -3.47693  | -0.834971 |
| H             | -0.082805 | -2.439309 | -1.535711 | H             | 0.526967  | -2.351583 | -0.98078  |
| H             | 6.644009  | -0.177942 | -1.872415 | H             | 6.945377  | 0.4523    | -1.520523 |
| H             | 7.210358  | 0.461783  | -0.334834 | H             | 6.52914   | 1.550952  | -0.211618 |
| H             | 6.750875  | -1.249348 | -0.459452 | H             | 6.73988   | -0.180113 | 0.12645   |
| H             | 5.30719   | 2.273972  | -0.368657 | H             | 4.426474  | 2.317914  | -1.552866 |
| H             | 4.775104  | 1.643287  | -1.921353 | H             | 4.806498  | 1.194327  | -2.850979 |
| H             | 3.625054  | 1.759427  | -0.580071 | H             | 3.223316  | 1.120715  | -2.06211  |

|               |           |           |           |               |           |           |           |
|---------------|-----------|-----------|-----------|---------------|-----------|-----------|-----------|
| H             | 0.775872  | -1.106955 | 2.457839  | H             | 0.416288  | -0.807319 | 3.023535  |
| H             | 0.71662   | -2.854961 | 2.145865  | H             | 0.418634  | -2.568783 | 2.7875    |
| H             | -0.774806 | -1.896662 | 2.157924  | H             | -1.042581 | -1.62589  | 2.439     |
| H             | 0.048099  | 3.155011  | 2.274336  | H             | -0.598293 | 4.627472  | 1.484652  |
| H             | 1.60289   | 2.362528  | 1.959346  | H             | 0.494023  | 3.801822  | 2.615869  |
| H             | 0.135909  | 1.385289  | 2.141958  | H             | -1.250443 | 3.493346  | 2.679444  |
| H             | 0.486461  | 4.62492   | 0.17138   | H             | 0.806701  | 3.710789  | -0.513764 |
| H             | 0.721091  | 3.848321  | -1.401591 | H             | 1.149776  | 1.969848  | -0.615802 |
| H             | 1.984987  | 3.735221  | -0.163084 | H             | 1.897089  | 2.946245  | 0.660862  |
| H             | 2.811904  | -0.787538 | 1.763563  | H             | 2.218482  | -0.363201 | -1.066847 |
| H             | 2.507501  | 0.442592  | 0.547759  | H             | 2.702683  | -2.046165 | -0.887639 |
| H             | 2.331721  | -2.577106 | 0.030398  | H             | 2.197778  | -0.179907 | 1.489882  |
| H             | 1.945666  | -1.318501 | -1.131825 | H             | 2.54143   | -1.902289 | 1.566224  |
| H             | 0.756965  | 1.59461   | -0.268953 | H             | -0.003289 | 1.614619  | 1.569542  |
| H             | -3.293353 | 3.155049  | -0.259275 | H             | -3.402962 | 2.854181  | -0.819568 |
| H             | -5.396164 | -1.974691 | -0.503433 | H             | -4.860707 | -2.492092 | -1.2337   |
| H             | -0.086518 | -4.627187 | -0.767505 | H             | 0.649143  | -4.49156  | -0.092199 |
| <b>2b (5)</b> |           |           |           | <b>2b (6)</b> |           |           |           |
| C             | -4.068577 | -0.948209 | -0.729478 | C             | 2.064134  | 2.813503  | -0.895379 |
| C             | -2.351088 | 0.7465    | -0.186027 | C             | 2.250541  | 0.375195  | -0.527325 |
| C             | -1.802318 | -1.676894 | -0.166075 | C             | 0.385638  | 1.677932  | 0.47476   |
| C             | -1.435857 | -0.342854 | 0.024524  | C             | 1.054848  | 0.471396  | 0.262896  |
| C             | -3.691434 | 0.384159  | -0.557179 | C             | 2.738868  | 1.606534  | -1.084884 |
| C             | -3.131419 | -1.955322 | -0.539193 | C             | 0.906089  | 2.839508  | -0.129473 |
| C             | 3.963572  | 0.743228  | -0.34535  | C             | -4.020643 | -1.236552 | -0.76719  |
| C             | -2.030939 | 2.177635  | -0.079447 | C             | 2.987439  | -0.860247 | -0.835735 |
| C             | 5.227684  | 0.441369  | -0.683813 | C             | -4.947689 | -0.466376 | -1.35933  |
| C             | -0.811377 | -2.804636 | 0.005183  | C             | -0.850512 | 1.763978  | 1.342091  |
| C             | 0.617659  | -2.268903 | 0.023469  | C             | -1.010688 | 0.516591  | 2.214433  |
| C             | 0.722667  | -1.046837 | 0.951525  | C             | -0.76302  | -0.753583 | 1.375282  |
| C             | 6.337694  | 1.449785  | -0.495086 | C             | -5.651229 | -0.935574 | -2.612062 |
| C             | 5.67757   | -0.875182 | -1.270682 | C             | -5.386821 | 0.893788  | -0.872904 |
| C             | 0.308649  | -1.358565 | 2.39452   | C             | -0.760162 | -2.014064 | 2.236659  |
| C             | -0.460084 | 2.8521    | 1.740312  | C             | 3.158158  | -2.524162 | 1.018091  |
| C             | -0.434411 | 4.094161  | -0.472245 | C             | 3.023323  | -3.324195 | -1.386365 |
| C             | 2.729014  | -0.114493 | -0.450568 | C             | -3.212807 | -0.952723 | 0.473501  |
| C             | 2.119379  | -0.402601 | 0.93605   | C             | -1.701812 | -0.890867 | 0.157597  |
| C             | -0.636903 | 2.733448  | 0.210364  | C             | 2.563841  | -2.256673 | -0.382892 |
| O             | -2.941569 | 3.028454  | -0.224202 | O             | 4.047307  | -0.796795 | -1.503382 |
| O             | -0.174989 | -0.02106  | 0.417932  | O             | 0.615485  | -0.670213 | 0.865253  |
| O             | -4.646636 | 1.303915  | -0.759768 | O             | 3.855739  | 1.658948  | -1.825336 |
| O             | -3.444398 | -3.267465 | -0.697501 | O             | 0.216111  | 3.987709  | 0.092087  |
| O             | 1.556964  | -3.238434 | 0.478686  | O             | -0.14359  | 0.560333  | 3.34942   |

|               |           |           |           |               |           |           |           |
|---------------|-----------|-----------|-----------|---------------|-----------|-----------|-----------|
| H             | -5.093631 | -1.170495 | -1.009339 | H             | 2.465023  | 3.714388  | -1.349494 |
| H             | 3.783855  | 1.735478  | 0.074402  | H             | -3.798413 | -2.198926 | -1.232956 |
| H             | -0.998887 | -3.363825 | 0.931751  | H             | -0.792339 | 2.638329  | 1.99832   |
| H             | -0.92382  | -3.525115 | -0.813964 | H             | -1.745951 | 1.909133  | 0.722481  |
| H             | 0.878402  | -1.934666 | -0.990331 | H             | -2.019297 | 0.481938  | 2.634368  |
| H             | 7.121018  | 1.055471  | 0.167617  | H             | -6.738233 | -0.988418 | -2.457783 |
| H             | 6.829559  | 1.679685  | -1.450869 | H             | -5.491242 | -0.232099 | -3.44126  |
| H             | 5.970171  | 2.388164  | -0.06748  | H             | -5.304433 | -1.92351  | -2.931558 |
| H             | 6.137014  | -0.721687 | -2.257164 | H             | -5.235493 | 1.648792  | -1.656645 |
| H             | 6.451188  | -1.333425 | -0.639049 | H             | -6.46249  | 0.894481  | -0.648171 |
| H             | 4.867807  | -1.599103 | -1.386835 | H             | -4.857674 | 1.229148  | 0.022021  |
| H             | 0.482605  | -0.48582  | 3.031678  | H             | -0.523103 | -2.891498 | 1.627026  |
| H             | 0.900472  | -2.194455 | 2.777959  | H             | -1.743368 | -2.164723 | 2.692157  |
| H             | -0.749642 | -1.625158 | 2.463378  | H             | -0.025212 | -1.926263 | 3.038756  |
| H             | -1.202198 | 3.541299  | 2.160034  | H             | 4.253143  | -2.481425 | 0.984063  |
| H             | 0.537009  | 3.244004  | 1.970478  | H             | 2.867138  | -3.523425 | 1.360625  |
| H             | -0.567343 | 1.882704  | 2.234851  | H             | 2.803088  | -1.796518 | 1.75302   |
| H             | -1.144358 | 4.838771  | -0.101883 | H             | 4.11352   | -3.357585 | -1.466149 |
| H             | -0.559491 | 4.019489  | -1.558287 | H             | 2.617818  | -3.134954 | -2.386506 |
| H             | 0.580812  | 4.454542  | -0.272289 | H             | 2.670725  | -4.308403 | -1.058319 |
| H             | 1.981721  | 0.409214  | -1.063945 | H             | -3.537994 | -0.021729 | 0.947568  |
| H             | 2.949097  | -1.057576 | -0.958854 | H             | -3.397248 | -1.753399 | 1.203396  |
| H             | 2.048039  | 0.533278  | 1.504873  | H             | -1.520695 | -0.064847 | -0.538602 |
| H             | 2.794091  | -1.058815 | 1.495971  | H             | -1.408642 | -1.806807 | -0.37117  |
| H             | 0.109824  | 2.034475  | -0.164031 | H             | 1.477999  | -2.287947 | -0.300788 |
| H             | -4.206605 | 2.189866  | -0.578262 | H             | 4.199854  | 0.71447   | -1.856135 |
| H             | -4.376129 | -3.349659 | -0.961544 | H             | 0.670417  | 4.729189  | -0.342085 |
| H             | 1.507563  | -3.997247 | -0.124886 | H             | 0.769707  | 0.522307  | 3.018842  |
| <b>2b (7)</b> |           |           |           | <b>2b (8)</b> |           |           |           |
| C             | -2.431552 | -0.514445 | -2.44276  | C             | -4.145228 | -1.35719  | -0.337525 |
| C             | -1.578953 | 0.795766  | -0.526172 | C             | -2.611158 | 0.572573  | -0.13205  |
| C             | -1.154419 | -1.648786 | -0.691834 | C             | -1.740891 | -1.752989 | -0.132379 |
| C             | -1.004353 | -0.426261 | -0.033993 | C             | -1.534368 | -0.376641 | -0.040296 |
| C             | -2.294679 | 0.700043  | -1.768493 | C             | -3.931218 | 0.019968  | -0.26584  |
| C             | -1.872095 | -1.665193 | -1.904358 | C             | -3.060351 | -2.222334 | -0.277514 |
| C             | 3.909913  | -0.145749 | -0.131419 | C             | 4.510902  | 0.666444  | 0.373522  |
| C             | -1.498669 | 2.115423  | 0.122303  | C             | -2.475788 | 2.036249  | -0.133139 |
| C             | 4.188879  | 0.673165  | -1.15869  | C             | 5.611471  | 0.490548  | -0.3757   |
| C             | -0.587586 | -2.936047 | -0.133674 | C             | -0.588076 | -2.724438 | -0.089699 |
| C             | -0.172067 | -2.775523 | 1.330482  | C             | 0.748031  | -2.017476 | -0.310666 |
| C             | 0.592488  | -1.446277 | 1.526191  | C             | 0.837435  | -0.735779 | 0.540799  |
| C             | 5.441895  | 0.478073  | -1.981114 | C             | 6.582659  | 1.627029  | -0.599235 |
| C             | 3.332205  | 1.836544  | -1.597741 | C             | 6.000932  | -0.802178 | -1.05165  |



|               |           |           |           |                |           |           |           |
|---------------|-----------|-----------|-----------|----------------|-----------|-----------|-----------|
| C             | 0.89191   | -1.192509 | 3.001678  | C              | 0.717746  | -1.005734 | 2.042762  |
| C             | -1.902913 | 1.951975  | 2.582145  | C              | -0.731225 | 3.022641  | 1.355321  |
| C             | -0.462185 | 3.829374  | 1.666677  | C              | -1.241118 | 4.107327  | -0.880592 |
| C             | 2.723267  | -0.118659 | 0.797213  | C              | 3.433609  | -0.332149 | 0.711317  |
| C             | 1.85734   | -1.387289 | 0.644948  | C              | 2.058809  | 0.138686  | 0.191832  |
| C             | -0.880895 | 2.363116  | 1.497476  | C              | -1.141004 | 2.780203  | -0.114048 |
| O             | -2.004178 | 3.113148  | -0.444451 | O              | -3.504722 | 2.754134  | -0.147877 |
| O             | -0.324377 | -0.361876 | 1.146515  | O              | -0.283364 | 0.123477  | 0.132961  |
| O             | -2.865913 | 1.767197  | -2.345907 | O              | -5.023218 | 0.796326  | -0.333128 |
| O             | -1.985092 | -2.872855 | -2.514495 | O              | -3.210091 | -3.570282 | -0.349778 |
| O             | -1.303051 | -2.857367 | 2.199653  | O              | 1.840098  | -2.867125 | 0.032625  |
| H             | -2.97888  | -0.534405 | -3.380039 | H              | -5.161443 | -1.725341 | -0.439261 |
| H             | 4.618442  | -0.952082 | 0.070343  | H              | 4.352661  | 1.659967  | 0.799706  |
| H             | -1.334511 | -3.734414 | -0.193188 | H              | -0.549891 | -3.254951 | 0.871541  |
| H             | 0.266417  | -3.275048 | -0.734613 | H              | -0.72355  | -3.496266 | -0.857152 |
| H             | 0.475687  | -3.604715 | 1.62947   | H              | 0.82514   | -1.706709 | -1.363713 |
| H             | 5.197179  | 0.307532  | -3.039043 | H              | 7.58618   | 1.36755   | -0.233009 |
| H             | 6.07701   | 1.374827  | -1.952486 | H              | 6.69319   | 1.847151  | -1.670533 |
| H             | 6.035989  | -0.370734 | -1.627574 | H              | 6.263278  | 2.544404  | -0.094258 |
| H             | 2.417906  | 1.950037  | -1.010883 | H              | 6.118337  | -0.650531 | -2.133659 |
| H             | 3.895288  | 2.777956  | -1.531525 | H              | 6.974946  | -1.153708 | -0.683137 |
| H             | 3.04347   | 1.724327  | -2.651909 | H              | 5.276012  | -1.605339 | -0.90154  |
| H             | 1.266597  | -0.177971 | 3.15793   | H              | 0.871746  | -0.081021 | 2.607909  |
| H             | 1.652674  | -1.898904 | 3.350903  | H              | 1.466221  | -1.737442 | 2.357763  |
| H             | -0.010209 | -1.33231  | 3.599983  | H              | -0.270676 | -1.39949  | 2.296448  |
| H             | -2.816163 | 2.552848  | 2.497434  | H              | -1.479259 | 3.641212  | 1.86495   |
| H             | -1.475922 | 2.122346  | 3.576626  | H              | 0.228751  | 3.549824  | 1.392165  |
| H             | -2.173379 | 0.895402  | 2.505946  | H              | -0.625193 | 2.08291   | 1.904399  |
| H             | -1.322378 | 4.502898  | 1.614985  | H              | -1.975746 | 4.777822  | -0.426254 |
| H             | 0.250195  | 4.134869  | 0.892646  | H              | -1.531664 | 3.945728  | -1.924743 |
| H             | 0.01919   | 3.95962   | 2.642337  | H              | -0.265906 | 4.606773  | -0.874084 |
| H             | 3.088555  | -0.049305 | 1.830578  | H              | 3.655396  | -1.323342 | 0.31399   |
| H             | 2.103308  | 0.766032  | 0.624522  | H              | 3.38403   | -0.437274 | 1.804708  |
| H             | 2.46419   | -2.272883 | 0.877175  | H              | 2.10124   | 0.246303  | -0.899468 |
| H             | 1.568577  | -1.477441 | -0.407047 | H              | 1.853147  | 1.138412  | 0.59543   |
| H             | -0.003686 | 1.726237  | 1.607345  | H              | -0.379469 | 2.156906  | -0.58084  |
| H             | -2.654828 | 2.542646  | -1.741661 | H              | -4.685    | 1.74003   | -0.253151 |
| H             | -2.511937 | -2.778742 | -3.325848 | H              | -4.151007 | -3.786782 | -0.460889 |
| H             | -1.883079 | -2.105051 | 1.993875  | H              | 1.791889  | -3.647582 | -0.54305  |
| <b>2b (9)</b> |           |           |           | <b>2b (10)</b> |           |           |           |
| C             | -4.323037 | -0.88575  | -0.038442 | C              | 4.14518   | -1.357368 | -0.337597 |
| C             | -2.501581 | 0.786584  | -0.061061 | C              | 2.611227  | 0.572466  | -0.131972 |
| C             | -1.998387 | -1.644704 | -0.030535 | C              | 1.740828  | -1.75305  | -0.132301 |

|   |           |           |           |   |           |           |           |
|---|-----------|-----------|-----------|---|-----------|-----------|-----------|
| C | -1.578345 | -0.314955 | -0.051148 | C | 1.534394  | -0.376687 | -0.040188 |
| C | -3.896925 | 0.442154  | -0.083807 | C | 3.931266  | 0.019794  | -0.265844 |
| C | -3.38152  | -1.906735 | -0.00567  | C | 3.060251  | -2.222456 | -0.277551 |
| C | 4.545606  | -0.300993 | -0.655179 | C | -4.510862 | 0.666712  | 0.373275  |
| C | -2.14696  | 2.212414  | -0.011303 | C | 2.475943  | 2.036132  | -0.133044 |
| C | 5.568396  | 0.37218   | -0.103269 | C | -5.611537 | 0.490576  | -0.375733 |
| C | -1.008077 | -2.781828 | -0.067825 | C | 0.587942  | -2.724425 | -0.089576 |
| C | 0.376473  | -2.309388 | -0.509631 | C | -0.748085 | -2.017355 | -0.310648 |
| C | 0.7728    | -1.007917 | 0.216139  | C | -0.837469 | -0.735667 | 0.540842  |
| C | 6.627728  | 1.012885  | -0.97051  | C | -6.582726 | 1.626999  | -0.599552 |
| C | 5.782825  | 0.56114   | 1.379505  | C | -6.001129 | -0.802404 | -1.051119 |
| C | 0.825303  | -1.161689 | 1.738146  | C | -0.717908 | -1.005664 | 2.042809  |
| C | -0.722954 | 4.060135  | 0.951094  | C | 1.24146   | 4.107197  | -0.880789 |
| C | -0.097729 | 2.940955  | -1.239404 | C | 0.73132   | 3.022826  | 1.355214  |
| C | 3.399238  | -1.002864 | 0.026778  | C | -3.433591 | -0.331812 | 0.711327  |
| C | 2.049503  | -0.358753 | -0.355474 | C | -2.058759 | 0.138879  | 0.19178   |
| C | -0.724774 | 2.744448  | 0.158478  | C | 1.141212  | 2.780167  | -0.114084 |
| O | -3.048887 | 3.078844  | -0.111693 | O | 3.504931  | 2.753966  | -0.147706 |
| O | -0.255214 | -0.011862 | -0.118387 | O | 0.283438  | 0.123522  | 0.133152  |
| O | -4.858872 | 1.376058  | -0.130377 | O | 5.023276  | 0.796114  | -0.333149 |
| O | -3.741405 | -3.21586  | 0.032557  | O | 3.209936  | -3.570403 | -0.349874 |
| O | 1.364512  | -3.300329 | -0.237212 | O | -1.840249 | -2.866923 | 0.032536  |
| H | -5.388356 | -1.094673 | -0.038599 | H | 5.161361  | -1.725587 | -0.43942  |
| H | 4.51578   | -0.352597 | -1.746027 | H | -4.352522 | 1.660389  | 0.799065  |
| H | -0.917019 | -3.259722 | 0.917209  | H | 0.723392  | -3.496331 | -0.856947 |
| H | -1.362416 | -3.562446 | -0.751844 | H | 0.549669  | -3.254842 | 0.871711  |
| H | 0.355273  | -2.07947  | -1.585752 | H | -0.825082 | -1.706552 | -1.363687 |
| H | 6.682834  | 2.096098  | -0.791551 | H | -6.693477 | 1.846671  | -1.670918 |
| H | 7.624557  | 0.611467  | -0.738929 | H | -7.58618  | 1.367714  | -0.233003 |
| H | 6.436026  | 0.853239  | -2.036486 | H | -6.263209 | 2.544574  | -0.095026 |
| H | 6.747343  | 0.134175  | 1.688119  | H | -6.974985 | -1.1539   | -0.68215  |
| H | 5.826025  | 1.630519  | 1.628825  | H | -6.118929 | -0.65112  | -2.133135 |
| H | 5.002963  | 0.105144  | 1.993737  | H | -5.276088 | -1.605455 | -0.901    |
| H | 1.175391  | -0.232875 | 2.199733  | H | -0.871954 | -0.080974 | 2.60798   |
| H | 1.507594  | -1.969685 | 2.014707  | H | 0.270503  | -1.399413 | 2.296548  |
| H | -0.161656 | -1.395028 | 2.148092  | H | -1.466401 | -1.737385 | 2.357743  |
| H | -1.280469 | 4.842914  | 0.429509  | H | 1.976087  | 4.777706  | -0.426467 |
| H | 0.308833  | 4.402736  | 1.087544  | H | 0.266275  | 4.6067    | -0.874418 |
| H | -1.170406 | 3.9308    | 1.943022  | H | 1.532085  | 3.945459  | -1.924895 |
| H | -0.678314 | 3.66671   | -1.820831 | H | 1.479306  | 3.641495  | 1.864796  |
| H | -0.054098 | 2.001134  | -1.796568 | H | 0.62527   | 2.083185  | 1.904441  |
| H | 0.923836  | 3.32422   | -1.138321 | H | -0.228664 | 3.55      | 1.391887  |
| H | 3.384935  | -2.056642 | -0.272725 | H | -3.384036 | -0.43667  | 1.804744  |

|                |           |           |           |   |           |           |           |
|----------------|-----------|-----------|-----------|---|-----------|-----------|-----------|
| H              | 3.521044  | -0.988078 | 1.114033  | H | -3.655376 | -1.323093 | 0.31422   |
| H              | 1.953909  | -0.330176 | -1.448966 | H | -1.853023 | 1.138618  | 0.595302  |
| H              | 2.053407  | 0.68483   | -0.01796  | H | -2.101189 | 0.24641   | -0.899527 |
| H              | -0.131436 | 2.005403  | 0.695228  | H | 0.379669  | 2.156874  | -0.580867 |
| H              | -4.373988 | 2.256449  | -0.161727 | H | 4.685083  | 1.739847  | -0.253096 |
| H              | -4.710689 | -3.287113 | 0.024355  | H | 4.150842  | -3.786932 | -0.461012 |
| H              | 1.122528  | -4.096041 | -0.738239 | H | -1.792818 | -3.64676  | -0.544038 |
| <b>2b (11)</b> |           |           |           |   |           |           |           |
| C              | -4.353333 | -0.400778 | -0.016612 |   |           |           |           |
| C              | -2.287939 | 0.962236  | 0.003796  |   |           |           |           |
| C              | -2.178395 | -1.517136 | -0.079397 |   |           |           |           |
| C              | -1.548046 | -0.272172 | -0.036913 |   |           |           |           |
| C              | -3.721155 | 0.842685  | -0.001396 |   |           |           |           |
| C              | -3.585701 | -1.55669  | -0.052997 |   |           |           |           |
| C              | 4.090238  | 0.435606  | -0.410084 |   |           |           |           |
| C              | -1.717628 | 2.316093  | 0.071091  |   |           |           |           |
| C              | 5.380645  | 0.258668  | -0.082899 |   |           |           |           |
| C              | -1.394829 | -2.802797 | -0.181361 |   |           |           |           |
| C              | 0.05028   | -2.540981 | -0.595231 |   |           |           |           |
| C              | 0.646259  | -1.35922  | 0.196677  |   |           |           |           |
| C              | 6.480976  | 0.710984  | -1.015162 |   |           |           |           |
| C              | 5.871949  | -0.379137 | 1.194414  |   |           |           |           |
| C              | 0.661043  | -1.611131 | 1.706467  |   |           |           |           |
| C              | 0.055793  | 3.949752  | 0.825676  |   |           |           |           |
| C              | 0.32128   | 2.64149   | -1.332359 |   |           |           |           |
| C              | 2.858145  | 0.054077  | 0.369971  |   |           |           |           |
| C              | 2.034387  | -1.016155 | -0.373852 |   |           |           |           |
| C              | -0.222568 | 2.618842  | 0.11388   |   |           |           |           |
| O              | -2.48012  | 3.312588  | 0.074498  |   |           |           |           |
| O              | -0.189915 | -0.185035 | -0.078704 |   |           |           |           |
| O              | -4.525966 | 1.915439  | 0.020282  |   |           |           |           |
| O              | -4.14906  | -2.792339 | -0.078025 |   |           |           |           |
| O              | 0.876503  | -3.680364 | -0.367949 |   |           |           |           |
| H              | -5.438336 | -0.437839 | -0.006331 |   |           |           |           |
| H              | 3.880574  | 0.906861  | -1.37293  |   |           |           |           |
| H              | -1.397315 | -3.345399 | 0.773657  |   |           |           |           |
| H              | -1.870001 | -3.470268 | -0.910104 |   |           |           |           |
| H              | 0.076966  | -2.258863 | -1.659027 |   |           |           |           |
| H              | 7.137494  | 1.443749  | -0.524948 |   |           |           |           |
| H              | 7.123428  | -0.132132 | -1.306293 |   |           |           |           |
| H              | 6.083244  | 1.167124  | -1.927401 |   |           |           |           |
| H              | 6.503932  | -1.249912 | 0.971114  |   |           |           |           |
| H              | 6.502698  | 0.321795  | 1.758861  |   |           |           |           |

|   |           |           |           |  |  |  |  |
|---|-----------|-----------|-----------|--|--|--|--|
| H | 5.06655   | -0.710988 | 1.85375   |  |  |  |  |
| H | 1.053083  | -0.739941 | 2.237092  |  |  |  |  |
| H | 1.292813  | -2.474495 | 1.9337    |  |  |  |  |
| H | -0.343956 | -1.811365 | 2.088019  |  |  |  |  |
| H | -0.398585 | 4.791051  | 0.295149  |  |  |  |  |
| H | 1.137583  | 4.116828  | 0.875941  |  |  |  |  |
| H | -0.335137 | 3.946443  | 1.849116  |  |  |  |  |
| H | -0.17468  | 3.426398  | -1.915527 |  |  |  |  |
| H | 0.169632  | 1.683068  | -1.836044 |  |  |  |  |
| H | 1.396038  | 2.854563  | -1.322185 |  |  |  |  |
| H | 3.122272  | -0.305793 | 1.368409  |  |  |  |  |
| H | 2.240373  | 0.950442  | 0.513892  |  |  |  |  |
| H | 2.607926  | -1.94808  | -0.405369 |  |  |  |  |
| H | 1.888657  | -0.703694 | -1.416121 |  |  |  |  |
| H | 0.278269  | 1.815085  | 0.65212   |  |  |  |  |
| H | -3.910185 | 2.71111   | 0.03424   |  |  |  |  |
| H | -5.117137 | -2.706877 | -0.078818 |  |  |  |  |
| H | 0.523863  | -4.40659  | -0.907034 |  |  |  |  |

Key transitions, oscillator strengths, and rotatory strengths in the ECD of conformers **2b** (5) at B3LYP /6-311++G(d,p) level.

| Species       | Excited State | $\Delta E(eV)^a$ | $\lambda(nm)^b$ | $f^c$  | $R_{vel}^d$ |
|---------------|---------------|------------------|-----------------|--------|-------------|
| <b>2b</b> (5) | 92 -> 97      | 3.7269           | 332.67          | 0.076  | 5.1071      |
|               | 91 ->108      | 4.1589           | 298.12          | 0.0011 | -0.2518     |
|               | 91 -> 95      | 4.2772           | 289.87          | 0.0188 | -4.1331     |
|               | 84 -> 95      | 4.4623           | 277.85          | 0.3639 | 6.7243      |
|               | 94 -> 99      | 5.2236           | 237.36          | 0.003  | -0.6586     |
|               | 89 -> 95      | 5.4583           | 227.15          | 0.0631 | 1.2971      |
|               | 93 -> 98      | 5.4769           | 226.37          | 0.0051 | -2.6545     |
|               | 94 -> 98      | 5.5539           | 223.24          | 0.0055 | -0.1919     |
|               | 94 -> 99      | 5.5662           | 222.74          | 0.0101 | -3.9368     |
|               | 94 -> 97      | 5.5937           | 221.65          | 0.0272 | 6.4633      |
|               | 92 -> 97      | 5.6289           | 220.26          | 0.0131 | 3.5137      |
|               | 94 -> 99      | 5.6495           | 219.46          | 0.0044 | -4.4822     |
|               | 94 ->100      | 5.7884           | 214.2           | 0.2025 | 61.3966     |
|               | 94 ->100      | 5.822            | 212.96          | 0.0047 | -7.9166     |
|               | 94 ->101      | 5.8463           | 212.07          | 0.0792 | -41.1861    |
|               | 93 -> 99      | 5.8861           | 210.64          | 0.0046 | -3.7936     |
|               | 93 ->100      | 5.9038           | 210.01          | 0.021  | -8.0402     |
|               | 87 -> 95      | 5.9134           | 209.67          | 0.0128 | -21.5855    |
|               | 93 -> 97      | 5.952            | 208.31          | 0.0274 | -6.0836     |
|               | 93 -> 97      | 5.9661           | 207.82          | 0.0268 | 2.7626      |
|               | 93 ->101      | 6.0398           | 205.28          | 0.036  | -0.0051     |

|  |          |        |        |        |          |
|--|----------|--------|--------|--------|----------|
|  | 93 ->100 | 6.0558 | 204.74 | 0.0027 | 11.3979  |
|  | 93 ->100 | 6.0647 | 204.44 | 0.0437 | 5.1613   |
|  | 94 ->102 | 6.1164 | 202.71 | 0.0003 | -0.8966  |
|  | 94 ->103 | 6.1368 | 202.03 | 0.0159 | -2.3557  |
|  | 94 ->104 | 6.1608 | 201.25 | 0.0197 | 10.3733  |
|  | 94 ->105 | 6.256  | 198.19 | 0.0293 | 25.3519  |
|  | 94 ->104 | 6.2947 | 196.97 | 0.1071 | -12.3992 |
|  | 94 ->105 | 6.3085 | 196.54 | 0.0269 | -19.2831 |
|  | 91 -> 97 | 6.3101 | 196.48 | 0.0697 | 3.1114   |
|  | 93 ->107 | 6.3561 | 195.06 | 0.117  | -32.8891 |
|  | 94 ->105 | 6.3806 | 194.31 | 0.0836 | -18.3998 |
|  | 86 -> 95 | 6.416  | 193.24 | 0.0175 | -16.5408 |
|  | 94 ->106 | 6.4229 | 193.04 | 0.1149 | -17.0325 |
|  | 91 -> 99 | 6.4407 | 192.5  | 0.0133 | 45.8503  |
|  | 93 ->103 | 6.4605 | 191.91 | 0.0585 | 61.9068  |
|  | 92 ->105 | 6.4858 | 191.16 | 0.031  | -26.9348 |
|  | 94 ->114 | 6.4903 | 191.03 | 0.0948 | -30.2598 |
|  | 93 ->106 | 6.5273 | 189.95 | 0.0063 | 10.1916  |
|  | 93 ->105 | 6.5396 | 189.59 | 0.0192 | 12.5553  |

<sup>a</sup>Excitation energy. <sup>b</sup>Wavelength. <sup>c</sup>Oscillator strength. <sup>d</sup>Rotatory strength in velocity form ( $10^{-40}$ egs.).

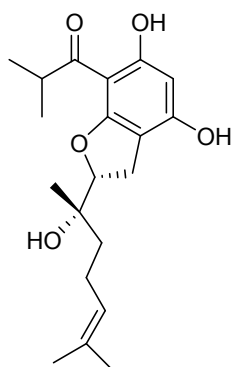

**3b**

Optimized geometries of predominant conformers for compound **3b** at the B3LYP/6-31G (d,p) level in methanol solution.

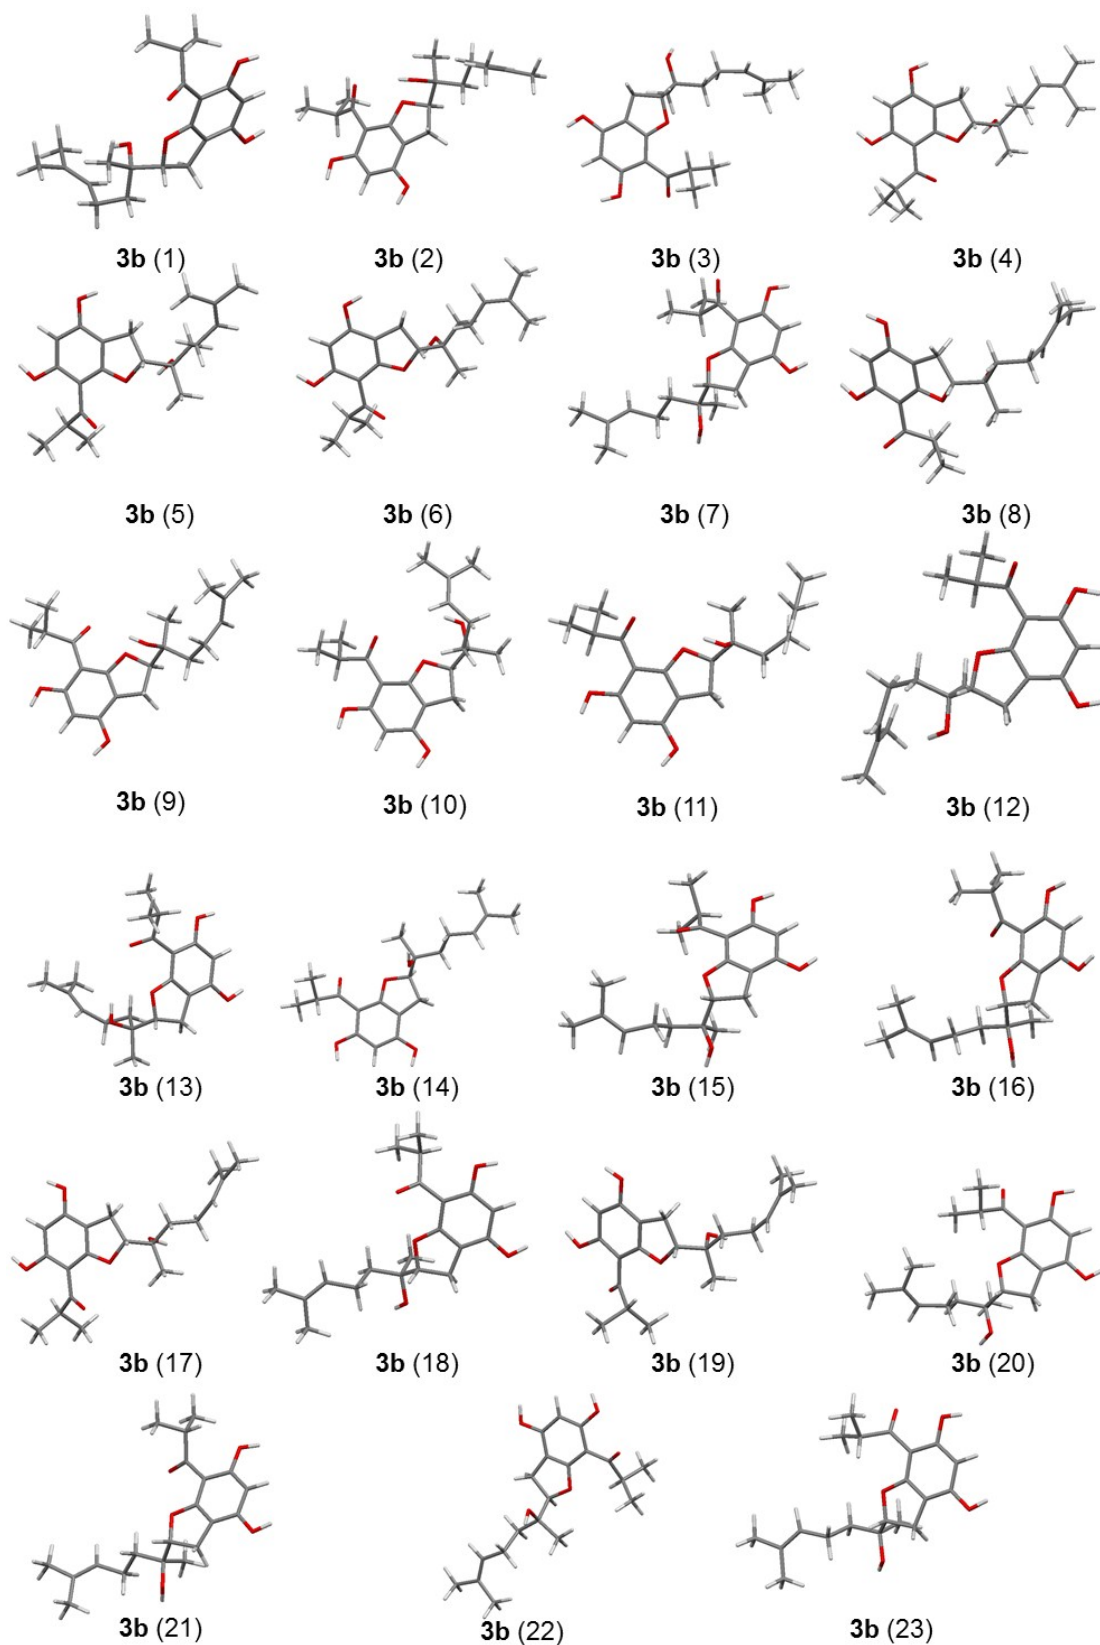

Important thermodynamic parameters (a.u.) and Boltzmann distributions of the optimized compound **3b** at B3LYP/6-31G(d,p) level in methanol solution.

| Conformations  | E+ZPE        | G            | %      |
|----------------|--------------|--------------|--------|
| <b>3b</b> (1)  | -1154.651026 | -1154.709271 | 2.71%  |
| <b>3b</b> (2)  | -1154.652849 | -1154.711691 | 35.14% |
| <b>3b</b> (3)  | -1154.649200 | -1154.708913 | 1.86%  |
| <b>3b</b> (4)  | -1154.651495 | -1154.710475 | 9.70%  |
| <b>3b</b> (5)  | -1154.651179 | -1154.710562 | 10.63% |
| <b>3b</b> (6)  | -1154.651071 | -1154.709747 | 4.49%  |
| <b>3b</b> (7)  | -1154.648744 | -1154.708680 | 1.45%  |
| <b>3b</b> (8)  | -1154.649054 | -1154.708471 | 1.16%  |
| <b>3b</b> (9)  | -1154.649967 | -1154.709170 | 2.44%  |
| <b>3b</b> (10) | -1154.649569 | -1154.708504 | 1.20%  |
| <b>3b</b> (11) | -1154.650086 | -1154.708437 | 1.12%  |
| <b>3b</b> (12) | -1154.650153 | -1154.708681 | 1.45%  |
| <b>3b</b> (13) | -1154.649131 | -1154.708671 | 1.44%  |
| <b>3b</b> (14) | -1154.649662 | -1154.708576 | 1.30%  |
| <b>3b</b> (15) | -1154.649867 | -1154.710090 | 6.45%  |
| <b>3b</b> (16) | -1154.649849 | -1154.708931 | 1.89%  |
| <b>3b</b> (17) | -1154.649875 | -1154.709039 | 2.12%  |
| <b>3b</b> (18) | -1154.649701 | -1154.709618 | 3.91%  |
| <b>3b</b> (19) | -1154.649182 | -1154.709043 | 2.13%  |
| <b>3b</b> (20) | -1154.649396 | -1154.708644 | 1.40%  |
| <b>3b</b> (21) | -1154.649366 | -1154.708570 | 1.29%  |
| <b>3b</b> (22) | -1154.649210 | -1154.708434 | 1.12%  |
| <b>3b</b> (23) | -1154.649407 | -1154.709542 | 3.61%  |

E+ZPE, G: total energy with zero point energy (ZPE) and Gibbs free energy in methanol solution at B3LYP/6-31G (d,p) level. %: Boltzmann distributions, using the relative Gibbs free energies as weighting factors.

Optimized Z-matrixes of compound **2b** in methanol solution (Å) at B3LYP/6-31G (d,p) level.

| <b>3b</b> (1) |           |           |           | <b>3b</b> (2) |           |           |           |
|---------------|-----------|-----------|-----------|---------------|-----------|-----------|-----------|
| C             | 3.160313  | 2.29046   | 0.892372  | C             | 2.915794  | 2.752421  | 0.102459  |
| C             | 2.665022  | 0.080692  | -0.089364 | C             | 2.871899  | 0.285767  | 0.131627  |
| C             | 1.034283  | 1.941004  | -0.194174 | C             | 0.837778  | 1.612855  | -0.350673 |
| C             | 1.429037  | 0.638864  | -0.486688 | C             | 1.495954  | 0.402505  | -0.159062 |
| C             | 3.524718  | 0.974344  | 0.603794  | C             | 3.555673  | 1.523093  | 0.271128  |
| C             | 1.900461  | 2.772824  | 0.505518  | C             | 1.548214  | 2.799855  | -0.20889  |
| C             | -4.863988 | 0.299618  | 0.412904  | C             | -5.617112 | -0.611135 | -0.488236 |
| C             | 2.99631   | -1.335187 | -0.404857 | C             | 3.503156  | -1.053034 | 0.2841    |
| C             | -5.322988 | -0.762053 | 1.102715  | C             | -6.588299 | -0.002372 | 0.211745  |
| C             | -0.374272 | 2.159008  | -0.675834 | C             | -0.618694 | 1.348159  | -0.626689 |
| C             | -0.67434  | 0.82114   | -1.404294 | C             | -0.615282 | -0.181058 | -0.862823 |
| C             | -5.586153 | -0.660422 | 2.587521  | C             | -7.829727 | 0.513593  | -0.479162 |
| C             | -5.643262 | -2.111241 | 0.505516  | C             | -6.567348 | 0.22675   | 1.704011  |
| C             | 5.156475  | -2.587055 | -0.076449 | C             | 4.925104  | -2.417193 | -1.252743 |
| C             | 2.998918  | -3.423522 | 0.970167  | C             | 5.835867  | -1.675935 | 1.000334  |

|               |           |           |           |               |           |           |           |
|---------------|-----------|-----------|-----------|---------------|-----------|-----------|-----------|
| C             | -2.024852 | -1.299645 | -1.603413 | C             | -1.52514  | -2.491885 | -0.430043 |
| C             | -4.57578  | 0.417463  | -1.064321 | C             | -4.316129 | -1.186056 | 0.008568  |
| C             | -3.172239 | 0.97613   | -1.394256 | C             | -3.102416 | -0.491914 | -0.643907 |
| C             | 3.822016  | -2.183486 | 0.575141  | C             | 4.942076  | -1.298672 | -0.194237 |
| C             | -1.966649 | 0.1002    | -0.969665 | C             | -1.727563 | -0.991044 | -0.161631 |
| O             | 2.56002   | -1.866893 | -1.424115 | O             | 2.856959  | -1.997115 | 0.734176  |
| O             | 0.47344   | -0.053728 | -1.149998 | O             | 0.669423  | -0.663636 | -0.335488 |
| O             | 4.766827  | 0.520322  | 0.940776  | O             | 4.871746  | 1.477595  | 0.626388  |
| O             | 1.483766  | 4.038033  | 0.779999  | O             | 0.87425   | 3.968538  | -0.375004 |
| O             | -1.88731  | -0.014555 | 0.45829   | O             | -1.662764 | -0.734473 | 1.248989  |
| H             | 3.861633  | 2.944311  | 1.405173  | H             | 3.475626  | 3.675415  | 0.234585  |
| H             | -4.697208 | 1.221556  | 0.974504  | H             | -5.76655  | -0.707344 | -1.566207 |
| H             | -1.065033 | 2.313743  | 0.159908  | H             | -1.242298 | 1.6105    | 0.236809  |
| H             | -0.469449 | 3.014737  | -1.352235 | H             | -1.003395 | 1.888368  | -1.496612 |
| H             | -0.70551  | 0.961074  | -2.490154 | H             | -0.61293  | -0.409313 | -1.935375 |
| H             | -5.340614 | 0.330857  | 2.98112   | H             | -7.805815 | 0.327703  | -1.557787 |
| H             | -6.642276 | -0.8656   | 2.810959  | H             | -8.734603 | 0.040982  | -0.071364 |
| H             | -5.001545 | -1.406073 | 3.14343   | H             | -7.949129 | 1.594879  | -0.321115 |
| H             | -5.422666 | -2.18011  | -0.561971 | H             | -5.657876 | -0.138    | 2.18666   |
| H             | -6.708327 | -2.34335  | 0.642748  | H             | -7.42425  | -0.267616 | 2.182783  |
| H             | -5.085291 | -2.904319 | 1.020983  | H             | -6.663965 | 1.297569  | 1.93101   |
| H             | 5.765067  | -1.707637 | -0.310574 | H             | 4.313318  | -2.140628 | -2.1195   |
| H             | 4.975557  | -3.141258 | -1.004145 | H             | 4.519089  | -3.341794 | -0.830631 |
| H             | 5.73155   | -3.229116 | 0.600538  | H             | 5.942803  | -2.614912 | -1.60765  |
| H             | 2.062678  | -3.142284 | 1.466564  | H             | 5.890979  | -0.858854 | 1.72702   |
| H             | 3.572297  | -4.051358 | 1.661497  | H             | 6.85329   | -1.897695 | 0.65867   |
| H             | 2.749556  | -4.018756 | 0.086193  | H             | 5.441796  | -2.564215 | 1.506139  |
| H             | -2.08803  | -1.241147 | -2.696495 | H             | -1.641307 | -2.723646 | -1.495122 |
| H             | -2.899329 | -1.850213 | -1.243067 | H             | -2.253454 | -3.08049  | 0.133871  |
| H             | -1.131083 | -1.86746  | -1.335535 | H             | -0.522131 | -2.80352  | -0.123253 |
| H             | -4.734775 | -0.533591 | -1.580997 | H             | -4.22844  | -1.107833 | 1.095434  |
| H             | -5.301514 | 1.119695  | -1.501065 | H             | -4.291898 | -2.258123 | -0.232057 |
| H             | -3.070183 | 1.96066   | -0.920596 | H             | -3.174151 | 0.583519  | -0.443875 |
| H             | -3.117499 | 1.14117   | -2.478029 | H             | -3.15199  | -0.614227 | -1.734239 |
| H             | 4.033248  | -1.600057 | 1.473292  | H             | 5.333599  | -0.387724 | -0.650954 |
| H             | 5.247482  | 1.219812  | 1.413471  | H             | 5.222638  | 2.38162   | 0.684116  |
| H             | 2.175981  | 4.511269  | 1.271065  | H             | 1.481074  | 4.717399  | -0.251008 |
| H             | -2.766832 | -0.296801 | 0.769797  | H             | -0.769771 | -0.997479 | 1.531893  |
| <b>3b (3)</b> |           |           |           | <b>3b (4)</b> |           |           |           |
| C             | -4.41381  | -0.744021 | 0.45974   | C             | 3.071022  | 2.660175  | -0.184958 |
| C             | -2.534757 | 0.83138   | 0.185028  | C             | 2.858652  | 0.209772  | 0.010256  |
| C             | -2.286517 | -1.582569 | -0.310747 | C             | 0.868805  | 1.685276  | -0.0173   |
| C             | -1.786551 | -0.287731 | -0.231844 | C             | 1.468185  | 0.430479  | 0.07593   |



|   |           |           |           |   |           |           |           |
|---|-----------|-----------|-----------|---|-----------|-----------|-----------|
| C | -3.882186 | 0.545501  | 0.546749  | C | 3.641813  | 1.390836  | -0.111919 |
| C | -3.613059 | -1.814865 | 0.035675  | C | 1.67758   | 2.811613  | -0.135534 |
| C | 4.855152  | -0.329336 | -0.388213 | C | -5.257921 | 0.387437  | -0.480435 |
| C | -1.973319 | 2.207733  | 0.269009  | C | 3.409562  | -1.171173 | 0.078381  |
| C | 5.608486  | 0.584089  | 0.245547  | C | -6.473266 | -0.173646 | -0.587451 |
| C | -1.198309 | -2.522531 | -0.752578 | C | -0.62715  | 1.526915  | 0.110533  |
| C | 0.008116  | -1.561347 | -0.921459 | C | -0.784279 | -0.003331 | -0.050957 |
| C | 6.646401  | 1.383433  | -0.508326 | C | -7.721623 | 0.67667   | -0.533003 |
| C | 5.521493  | 0.911004  | 1.717089  | C | -6.734381 | -1.649509 | -0.769954 |
| C | 0.323364  | 3.165356  | -0.142342 | C | 4.307297  | -2.739533 | -1.649995 |
| C | -1.650432 | 3.823228  | -1.60079  | C | 5.808023  | -1.920068 | 0.229175  |
| C | 0.972093  | -1.878473 | 1.422156  | C | -1.738367 | -2.221525 | 0.695756  |
| C | 3.773399  | -1.213641 | 0.175904  | C | -3.906958 | -0.281354 | -0.504304 |
| C | 2.402255  | -0.918611 | -0.466377 | C | -3.172793 | -0.117757 | 0.842818  |
| C | -0.980849 | 2.688243  | -0.801266 | C | 4.658499  | -1.557453 | -0.728135 |
| C | 1.265293  | -1.895135 | -0.083155 | C | -1.749702 | -0.701964 | 0.928309  |
| O | -2.328912 | 2.992916  | 1.143841  | O | 2.833845  | -2.037717 | 0.73348   |
| O | -0.463703 | -0.224134 | -0.555005 | O | 0.550342  | -0.568126 | 0.18615   |
| O | -4.670958 | 1.581836  | 0.939984  | O | 4.998111  | 1.246882  | -0.111551 |
| O | -4.076128 | -3.090061 | -0.051462 | O | 1.187535  | 4.07832   | -0.204098 |
| O | 1.589341  | -3.22755  | -0.521005 | O | -1.317639 | -0.422111 | 2.269288  |
| H | -5.455288 | -0.915545 | 0.722495  | H | 3.697262  | 3.544555  | -0.258777 |
| H | 5.023023  | -0.457852 | -1.459729 | H | -5.218339 | 1.470508  | -0.345853 |
| H | -0.992203 | -3.311545 | -0.022181 | H | -0.984528 | 1.853047  | 1.095418  |
| H | -1.433462 | -3.023529 | -1.697925 | H | -1.199875 | 2.062138  | -0.654548 |
| H | 0.309789  | -1.502064 | -1.971682 | H | -1.04201  | -0.256978 | -1.085002 |
| H | 7.648566  | 1.230175  | -0.083485 | H | -7.488836 | 1.738137  | -0.400627 |
| H | 6.681281  | 1.112959  | -1.568561 | H | -8.313098 | 0.568398  | -1.4531   |
| H | 6.442965  | 2.461307  | -0.437039 | H | -8.376232 | 0.364443  | 0.292916  |
| H | 6.48493   | 0.724541  | 2.211837  | H | -7.36744  | -2.030903 | 0.043153  |
| H | 4.756712  | 0.338292  | 2.246786  | H | -5.824217 | -2.252873 | -0.796606 |
| H | 5.303145  | 1.97822   | 1.861339  | H | -7.287476 | -1.831504 | -1.701895 |
| H | 0.115902  | 3.960742  | 0.581285  | H | 3.964422  | -3.597991 | -1.064103 |
| H | 1.012946  | 3.556948  | -0.898608 | H | 5.188746  | -3.041703 | -2.226587 |
| H | 0.825718  | 2.345901  | 0.383675  | H | 3.514892  | -2.47303  | -2.359239 |
| H | -2.568574 | 3.481163  | -2.092692 | H | 6.688481  | -2.241041 | -0.339097 |
| H | -0.969111 | 4.19147   | -2.376002 | H | 5.508863  | -2.740081 | 0.891405  |
| H | -1.90768  | 4.657802  | -0.940347 | H | 6.095053  | -1.062906 | 0.846644  |
| H | 0.722937  | -0.868743 | 1.761765  | H | -2.036308 | -2.48012  | -0.325776 |
| H | 1.848132  | -2.214795 | 1.987453  | H | -2.429945 | -2.706015 | 1.392631  |
| H | 0.142831  | -2.546287 | 1.673901  | H | -0.735265 | -2.626001 | 0.863389  |
| H | 4.039405  | -2.261963 | -0.02948  | H | -3.99796  | -1.342324 | -0.753796 |
| H | 3.712097  | -1.113369 | 1.263394  | H | -3.307541 | 0.174438  | -1.306386 |

|               |           |           |           |               |           |           |           |
|---------------|-----------|-----------|-----------|---------------|-----------|-----------|-----------|
| H             | 2.512756  | -0.953172 | -1.558708 | H             | -3.762322 | -0.600288 | 1.632015  |
| H             | 2.095799  | 0.102708  | -0.211898 | H             | -3.125838 | 0.946582  | 1.105035  |
| H             | -0.753433 | 1.867428  | -1.48415  | H             | 4.969561  | -0.710814 | -1.34337  |
| H             | -5.576071 | 1.253618  | 1.06958   | H             | 5.41365   | 2.118867  | -0.214894 |
| H             | -5.006692 | -3.121415 | 0.226534  | H             | 0.21806   | 4.057778  | -0.149271 |
| H             | 2.248875  | -3.587298 | 0.092823  | H             | -0.397312 | -0.733458 | 2.326889  |
| <b>3b (5)</b> |           |           |           | <b>3b (6)</b> |           |           |           |
| C             | 2.536017  | 2.824747  | 0.257941  | C             | 3.033681  | 2.696412  | -0.043538 |
| C             | 2.702728  | 0.413295  | -0.238999 | C             | 2.838708  | 0.248119  | -0.284996 |
| C             | 0.519719  | 1.498038  | 0.202658  | C             | 0.841829  | 1.685621  | 0.000905  |
| C             | 1.298347  | 0.388634  | -0.121697 | C             | 1.446084  | 0.445144  | -0.19636  |
| C             | 3.291362  | 1.694288  | -0.049168 | C             | 3.611839  | 1.439973  | -0.215414 |
| C             | 1.145285  | 2.724716  | 0.40604   | C             | 1.643174  | 2.820341  | 0.087743  |
| C             | -5.398794 | -0.820081 | -0.137329 | C             | -5.299866 | 0.446894  | -0.221078 |
| C             | 3.46245   | -0.828846 | -0.553047 | C             | 3.407229  | -1.119468 | -0.444434 |
| C             | -6.178881 | 0.217221  | -0.481797 | C             | -6.520911 | -0.091858 | -0.369796 |
| C             | -0.915223 | 1.061743  | 0.373371  | C             | -0.641387 | 1.485337  | 0.19707   |
| C             | -0.868634 | -0.375223 | -0.198796 | C             | -0.810467 | 0.012081  | -0.241935 |
| C             | -7.623943 | 0.273127  | -0.042201 | C             | -7.76078  | 0.706145  | -0.0375   |
| C             | -5.736786 | 1.398008  | -1.31265  | C             | -6.79836  | -1.49108  | -0.864989 |
| C             | 5.907561  | -1.116843 | -1.074495 | C             | 5.791224  | -1.824708 | -0.845366 |
| C             | 4.832829  | -2.38324  | 0.84698   | C             | 4.499911  | -2.69228  | 1.162802  |
| C             | -1.389133 | -2.843305 | -0.017725 | C             | -1.718591 | -2.318288 | 0.12503   |
| C             | -3.947286 | -1.059506 | -0.465796 | C             | -3.955715 | -0.180675 | -0.489082 |
| C             | -3.08591  | -1.127317 | 0.812644  | C             | -3.120089 | -0.298794 | 0.802543  |
| C             | 4.855976  | -1.066903 | 0.048514  | C             | 4.737913  | -1.493231 | 0.226555  |
| C             | -1.593549 | -1.461184 | 0.622662  | C             | -1.698708 | -0.875206 | 0.654473  |
| O             | 2.958915  | -1.708551 | -1.248077 | O             | 2.788551  | -1.985772 | -1.058546 |
| O             | 0.551875  | -0.741961 | -0.247603 | O             | 0.537993  | -0.567823 | -0.225335 |
| O             | 4.638666  | 1.799248  | -0.234083 | O             | 4.960647  | 1.323072  | -0.380881 |
| O             | 0.472844  | 3.858448  | 0.740299  | O             | 1.146821  | 4.070119  | 0.290179  |
| O             | -1.048054 | -1.467449 | 1.95189   | O             | -1.158911 | -0.862381 | 1.985565  |
| H             | 3.012659  | 3.793261  | 0.377276  | H             | 3.650548  | 3.589774  | -0.016251 |
| H             | -5.852024 | -1.604762 | 0.472366  | H             | -5.248625 | 1.471361  | 0.153768  |
| H             | -1.207331 | 1.049337  | 1.430782  | H             | -0.926117 | 1.613462  | 1.24906   |
| H             | -1.639067 | 1.676898  | -0.172219 | H             | -1.26922  | 2.147828  | -0.408548 |
| H             | -1.219308 | -0.38885  | -1.236461 | H             | -1.148996 | -0.041666 | -1.282215 |
| H             | -7.903907 | -0.599116 | 0.557121  | H             | -7.517792 | 1.714185  | 0.31346   |
| H             | -7.820187 | 1.175241  | 0.554348  | H             | -8.417416 | 0.798234  | -0.914173 |
| H             | -8.298735 | 0.323506  | -0.908413 | H             | -8.354249 | 0.206525  | 0.74115   |
| H             | -4.688219 | 1.350164  | -1.615526 | H             | -7.37845  | -2.053563 | -0.120373 |
| H             | -5.885162 | 2.335095  | -0.758309 | H             | -5.894632 | -2.063224 | -1.087098 |
| H             | -6.346647 | 1.479173  | -2.223137 | H             | -7.411925 | -1.463771 | -1.77623  |

|               |           |           |           |               |           |           |           |
|---------------|-----------|-----------|-----------|---------------|-----------|-----------|-----------|
| H             | 5.659701  | -1.905624 | -1.79335  | H             | 5.441596  | -2.643034 | -1.484569 |
| H             | 6.898742  | -1.330074 | -0.658254 | H             | 6.729862  | -2.135267 | -0.372489 |
| H             | 5.961071  | -0.163472 | -1.609947 | H             | 5.999931  | -0.955816 | -1.477733 |
| H             | 4.105709  | -2.343114 | 1.666519  | H             | 5.43856   | -2.98215  | 1.648185  |
| H             | 5.820193  | -2.576803 | 1.280978  | H             | 4.1199    | -3.551359 | 0.601161  |
| H             | 4.568259  | -3.223932 | 0.198018  | H             | 3.774341  | -2.450351 | 1.948354  |
| H             | -1.77143  | -2.879728 | -1.043138 | H             | -2.116222 | -2.373367 | -0.8938   |
| H             | -1.908067 | -3.604164 | 0.574264  | H             | -2.34228  | -2.940048 | 0.775446  |
| H             | -0.324534 | -3.094659 | -0.051255 | H             | -0.706789 | -2.735474 | 0.110494  |
| H             | -3.861732 | -2.01172  | -1.007747 | H             | -4.068095 | -1.164513 | -0.953233 |
| H             | -3.566378 | -0.286004 | -1.140617 | H             | -3.418053 | 0.444885  | -1.217088 |
| H             | -3.495565 | -1.89286  | 1.484176  | H             | -3.650907 | -0.942149 | 1.514964  |
| H             | -3.165739 | -0.175849 | 1.351629  | H             | -3.046027 | 0.686697  | 1.279225  |
| H             | 5.10508   | -0.247654 | 0.725593  | H             | 5.095683  | -0.649283 | 0.819555  |
| H             | 4.914686  | 2.716526  | -0.072277 | H             | 5.369816  | 2.201108  | -0.307237 |
| H             | -0.477718 | 3.669253  | 0.802739  | H             | 0.177684  | 4.033247  | 0.342486  |
| H             | -0.093123 | -1.626166 | 1.85277   | H             | -0.243236 | -1.182863 | 1.910087  |
| <b>3b (7)</b> |           |           |           | <b>3b (8)</b> |           |           |           |
| C             | -4.468556 | -1.11221  | -0.065149 | C             | 3.230456  | 2.669104  | 0.412066  |
| C             | -2.777415 | 0.677788  | -0.218481 | C             | 3.001927  | 0.233034  | 0.083002  |
| C             | -2.142958 | -1.715079 | -0.287647 | C             | 1.114227  | 1.782733  | -0.327981 |
| C             | -1.827931 | -0.360711 | -0.300513 | C             | 1.668418  | 0.508481  | -0.280958 |
| C             | -4.129007 | 0.242437  | -0.108476 | C             | 3.772764  | 1.38161   | 0.426933  |
| C             | -3.473991 | -2.096662 | -0.161697 | C             | 1.895683  | 2.874113  | 0.033474  |
| C             | 4.685249  | 0.636524  | 0.35292   | C             | -4.767623 | -0.627271 | 0.327531  |
| C             | -2.421632 | 2.121771  | -0.285866 | C             | 3.595408  | -1.13211  | 0.069842  |
| C             | 5.878259  | 0.525016  | -0.253482 | C             | -5.843956 | -0.035253 | 0.871876  |
| C             | -0.888353 | -2.531641 | -0.435759 | C             | -0.329425 | 1.685719  | -0.741201 |
| C             | 0.192493  | -1.43046  | -0.598853 | C             | -0.415001 | 0.22012   | -1.225982 |
| C             | 6.669915  | 1.756781  | -0.62841  | C             | -6.1739   | -0.236167 | 2.333638  |
| C             | 6.548107  | -0.778583 | -0.616423 | C             | -6.814067 | 0.859953  | 0.138045  |
| C             | -1.519012 | 3.645781  | 1.472892  | C             | 3.403042  | -3.059929 | 1.649485  |
| C             | -0.195446 | 3.241889  | -0.659348 | C             | 2.586973  | -3.288861 | -0.745935 |
| C             | 0.91309   | -1.355956 | 1.851406  | C             | -1.563725 | -2.026348 | -1.283228 |
| C             | 3.744152  | -0.455648 | 0.792246  | C             | -4.286087 | -0.549668 | -1.098784 |
| C             | 2.413753  | -0.406693 | 0.012122  | C             | -2.916139 | 0.144281  | -1.296095 |
| C             | -1.134764 | 2.621417  | 0.388547  | C             | 2.736293  | -2.344867 | 0.460052  |
| C             | 1.376395  | -1.488616 | 0.39525   | C             | -1.658013 | -0.579584 | -0.772935 |
| O             | -3.15898  | 2.936441  | -0.834409 | O             | 4.776688  | -1.311463 | -0.214455 |
| O             | -0.49125  | -0.143323 | -0.457348 | O             | 0.777268  | -0.448213 | -0.677921 |
| O             | -5.097756 | 1.19112   | 0.004066  | O             | 5.061742  | 1.192094  | 0.817938  |
| O             | -3.752218 | -3.427282 | -0.140704 | O             | 1.32149   | 4.105452  | 0.000582  |
| O             | 1.91718   | -2.801279 | 0.15431   | O             | -1.708403 | -0.56912  | 0.660934  |

|               |           |           |           |                |           |           |           |
|---------------|-----------|-----------|-----------|----------------|-----------|-----------|-----------|
| H             | -5.511005 | -1.402578 | 0.043749  | H              | 3.849281  | 3.516533  | 0.69832   |
| H             | 4.318851  | 1.64623   | 0.550635  | H              | -4.146696 | -1.234845 | 0.983536  |
| H             | -0.691124 | -3.17208  | 0.430131  | H              | -1.00004  | 1.856416  | 0.109966  |
| H             | -0.913546 | -3.187701 | -1.312314 | H              | -0.604871 | 2.387387  | -1.533868 |
| H             | 0.604703  | -1.44466  | -1.612724 | H              | -0.317612 | 0.164658  | -2.316336 |
| H             | 6.859266  | 1.789979  | -1.710679 | H              | -7.174242 | -0.675208 | 2.457434  |
| H             | 6.151842  | 2.6786    | -0.345051 | H              | -5.451119 | -0.892012 | 2.829647  |
| H             | 7.656062  | 1.755777  | -0.142839 | H              | -6.190024 | 0.722653  | 2.871318  |
| H             | 5.961004  | -1.65938  | -0.346517 | H              | -6.859916 | 1.849526  | 0.613984  |
| H             | 7.526329  | -0.86093  | -0.122512 | H              | -7.832291 | 0.448879  | 0.185903  |
| H             | 6.744242  | -0.822665 | -1.696728 | H              | -6.561828 | 1.007835  | -0.914552 |
| H             | -2.058071 | 4.489724  | 1.03052   | H              | 3.480963  | -2.400576 | 2.52191   |
| H             | -0.618978 | 4.028661  | 1.96691   | H              | 4.411406  | -3.391179 | 1.382024  |
| H             | -2.160098 | 3.196507  | 2.240504  | H              | 2.814517  | -3.937161 | 1.940689  |
| H             | 0.11956   | 2.49752   | -1.398292 | H              | 2.067492  | -2.795578 | -1.574172 |
| H             | 0.702632  | 3.643451  | -0.17633  | H              | 2.012248  | -4.178725 | -0.465033 |
| H             | -0.69823  | 4.060332  | -1.185981 | H              | 3.571927  | -3.612766 | -1.099614 |
| H             | 0.503635  | -0.360055 | 2.045354  | H              | -1.602333 | -2.065701 | -2.377912 |
| H             | 1.753548  | -1.509764 | 2.536974  | H              | -2.38882  | -2.623349 | -0.886252 |
| H             | 0.149632  | -2.100473 | 2.095923  | H              | -0.625111 | -2.487083 | -0.960786 |
| H             | 4.203674  | -1.441976 | 0.668017  | H              | -4.237891 | -1.562963 | -1.521186 |
| H             | 3.544738  | -0.33386  | 1.866311  | H              | -5.007958 | -0.007493 | -1.718143 |
| H             | 2.637787  | -0.520265 | -1.056489 | H              | -2.960152 | 1.137935  | -0.836112 |
| H             | 1.953934  | 0.581461  | 0.135491  | H              | -2.774063 | 0.300362  | -2.37388  |
| H             | -0.624285 | 1.781937  | 0.865502  | H              | 1.744263  | -2.006599 | 0.767225  |
| H             | -5.950897 | 0.750251  | 0.151229  | H              | 5.432538  | 2.046377  | 1.095096  |
| H             | -4.71121  | -3.561118 | -0.058926 | H              | 1.972611  | 4.778052  | 0.261017  |
| H             | 2.556118  | -2.99121  | 0.859133  | H              | -0.876095 | -0.969912 | 0.96609   |
| <b>3b (9)</b> |           |           |           | <b>3b (10)</b> |           |           |           |
| C             | 3.734177  | 2.14284   | 0.312069  | C              | 3.604425  | -1.646069 | -0.783532 |
| C             | 2.800646  | -0.085186 | -0.198532 | C              | 2.193872  | 0.248875  | -0.067469 |
| C             | 1.374808  | 1.938985  | -0.148062 | C              | 1.394082  | -2.089785 | 0.076333  |
| C             | 1.561995  | 0.575189  | -0.348911 | C              | 1.210272  | -0.719026 | 0.233445  |
| C             | 3.889756  | 0.767542  | 0.126915  | C              | 3.401964  | -0.276863 | -0.599026 |
| C             | 2.46558   | 2.730544  | 0.194358  | C              | 2.595554  | -2.559413 | -0.442267 |
| C             | -5.333926 | 0.19676   | -0.348958 | C              | -3.479533 | 0.82752   | -1.345605 |
| C             | 2.907994  | -1.559023 | -0.384749 | C              | 1.925221  | 1.694938  | 0.158541  |
| C             | -6.074084 | -0.815488 | 0.132091  | C              | -4.253884 | 1.726417  | -0.714123 |
| C             | -0.091313 | 2.261989  | -0.258902 | C              | 0.147691  | -2.818493 | 0.50344   |
| C             | -0.657774 | 0.942165  | -0.834298 | C              | -0.693773 | -1.666116 | 1.111096  |
| C             | -6.993498 | -1.599608 | -0.775739 | C              | -3.998142 | 3.208108  | -0.868164 |
| C             | -6.085437 | -1.266846 | 1.572843  | C              | -5.423128 | 1.383352  | 0.176307  |
| C             | 4.955734  | -3.023276 | -0.429523 | C              | 2.640192  | 3.306598  | 1.93248   |

|                |           |           |           |                |           |           |           |
|----------------|-----------|-----------|-----------|----------------|-----------|-----------|-----------|
| C              | 3.082768  | -3.460788 | 1.229025  | C              | 3.311223  | 3.695246  | -0.48628  |
| C              | -2.299544 | -0.966782 | -0.795353 | C              | -2.964052 | -2.730751 | 1.187675  |
| C              | -4.400916 | 1.120078  | 0.394216  | C              | -3.578095 | -0.678888 | -1.356887 |
| C              | -3.070494 | 1.436377  | -0.327668 | C              | -2.28759  | -1.381244 | -0.869491 |
| C              | 3.881549  | -2.385541 | 0.469714  | C              | 3.049489  | 2.642127  | 0.605279  |
| C              | -1.944266 | 0.394124  | -0.175905 | C              | -2.166596 | -1.530543 | 0.669975  |
| O              | 2.173842  | -2.143874 | -1.178333 | O              | 0.783698  | 2.138572  | 0.050322  |
| O              | 0.397494  | -0.063139 | -0.642875 | O              | -0.005401 | -0.418763 | 0.757987  |
| O              | 5.129737  | 0.204371  | 0.201338  | O              | 4.363561  | 0.613449  | -0.977057 |
| O              | 2.248512  | 4.057063  | 0.396199  | O              | 2.735412  | -3.9019   | -0.602634 |
| O              | -1.712068 | 0.244229  | 1.232986  | O              | -2.708575 | -0.391632 | 1.355263  |
| H              | 4.601747  | 2.758906  | 0.53799   | H              | 4.539252  | -2.002026 | -1.21052  |
| H              | -5.433183 | 0.423027  | -1.413342 | H              | -2.664422 | 1.218541  | -1.959364 |
| H              | -0.524193 | 2.47793   | 0.725598  | H              | -0.353337 | -3.300178 | -0.345599 |
| H              | -0.304745 | 3.111211  | -0.914607 | H              | 0.340754  | -3.599802 | 1.245386  |
| H              | -0.807252 | 1.023507  | -1.91739  | H              | -0.680315 | -1.711215 | 2.205553  |
| H              | -8.035525 | -1.54091  | -0.430424 | H              | -3.141513 | 3.410998  | -1.518821 |
| H              | -6.956885 | -1.236731 | -1.808054 | H              | -4.875955 | 3.717289  | -1.290634 |
| H              | -6.729831 | -2.666807 | -0.779229 | H              | -3.807529 | 3.679416  | 0.106158  |
| H              | -5.377452 | -0.722375 | 2.201882  | H              | -5.55049  | 0.309792  | 0.325787  |
| H              | -5.850252 | -2.337817 | 1.64516   | H              | -6.356909 | 1.785218  | -0.241336 |
| H              | -7.086544 | -1.141552 | 2.009124  | H              | -5.300863 | 1.847932  | 1.164173  |
| H              | 5.628718  | -3.649288 | 0.167508  | H              | 2.481716  | 2.562572  | 2.721983  |
| H              | 5.557608  | -2.258765 | -0.931334 | H              | 1.71319   | 3.875337  | 1.81012   |
| H              | 4.488341  | -3.653629 | -1.194091 | H              | 3.426515  | 3.992196  | 2.26784   |
| H              | 2.338005  | -3.011295 | 1.89633   | H              | 4.081391  | 4.40167   | -0.156103 |
| H              | 3.758742  | -4.070508 | 1.838966  | H              | 2.396397  | 4.259255  | -0.699414 |
| H              | 2.559112  | -4.118645 | 0.528386  | H              | 3.654258  | 3.227292  | -1.414651 |
| H              | -2.514611 | -0.868705 | -1.865692 | H              | -2.575659 | -3.672037 | 0.786153  |
| H              | -3.181155 | -1.386853 | -0.307669 | H              | -4.014372 | -2.63963  | 0.893588  |
| H              | -1.464491 | -1.665474 | -0.681871 | H              | -2.921075 | -2.772932 | 2.281412  |
| H              | -4.916423 | 2.083402  | 0.53092   | H              | -4.441625 | -1.032743 | -0.786518 |
| H              | -4.179843 | 0.751594  | 1.399729  | H              | -3.747694 | -0.996424 | -2.396148 |
| H              | -2.698288 | 2.387531  | 0.069043  | H              | -1.424516 | -0.820099 | -1.248507 |
| H              | -3.256749 | 1.595633  | -1.398113 | H              | -2.230298 | -2.379238 | -1.319145 |
| H              | 4.373298  | -1.733832 | 1.194237  | H              | 3.964822  | 2.069281  | 0.76567   |
| H              | 5.779782  | 0.886105  | 0.438425  | H              | 5.135206  | 0.130852  | -1.316654 |
| H              | 3.083422  | 4.493638  | 0.633713  | H              | 3.613006  | -4.098213 | -0.970712 |
| H              | -0.974029 | -0.382845 | 1.322514  | H              | -2.384641 | 0.403138  | 0.898889  |
| <b>3b (11)</b> |           |           |           | <b>3b (12)</b> |           |           |           |
| C              | 3.406353  | 2.339798  | 0.549706  | C              | -3.829367 | -2.115886 | 0.437886  |
| C              | 2.712667  | -0.003504 | 0.207833  | C              | -2.941029 | 0.134598  | -0.049591 |
| C              | 1.16484   | 1.881733  | -0.216606 | C              | -1.518643 | -1.886405 | -0.216675 |

|   |           |           |           |   |           |           |           |
|---|-----------|-----------|-----------|---|-----------|-----------|-----------|
| C | 1.455904  | 0.522592  | -0.159563 | C | -1.714045 | -0.512244 | -0.303718 |
| C | 3.67838   | 0.970719  | 0.577269  | C | -4.007649 | -0.735225 | 0.318856  |
| C | 2.142572  | 2.800181  | 0.149078  | C | -2.58187  | -2.696436 | 0.165513  |
| C | -5.093006 | 0.330135  | 0.319998  | C | 4.802176  | 0.60518   | -0.571934 |
| C | 2.950471  | -1.472438 | 0.199164  | C | -3.140446 | 1.602941  | -0.189755 |
| C | -5.850797 | -0.671974 | 0.79366   | C | 5.713234  | 0.161398  | 0.315012  |
| C | -0.270607 | 2.064156  | -0.633281 | C | -0.100493 | -2.224654 | -0.587986 |
| C | -0.633037 | 0.638928  | -1.11198  | C | 0.46492   | -0.835785 | -0.986357 |
| C | -6.307921 | -0.677974 | 2.234525  | C | 6.881097  | -0.684172 | -0.138722 |
| C | -6.327004 | -1.85631  | -0.013589 | C | 5.698993  | 0.459122  | 1.795112  |
| C | 4.125257  | -2.984795 | -1.407552 | C | -2.514304 | 3.473262  | 1.341974  |
| C | 4.955082  | -2.779241 | 0.984949  | C | -1.5793   | 3.39685   | -1.01935  |
| C | -2.174513 | -1.353871 | -1.179226 | C | 1.557294  | -0.263264 | 1.249525  |
| C | -4.569327 | 0.5325    | -1.078475 | C | 3.595421  | 1.482023  | -0.337162 |
| C | -3.109589 | 1.028851  | -1.161731 | C | 2.277401  | 0.909305  | -0.905896 |
| C | 4.318519  | -2.041306 | -0.206091 | C | -2.010398 | 2.567867  | 0.202358  |
| C | -2.001292 | 0.082     | -0.659255 | C | 1.762443  | -0.401492 | -0.266032 |
| O | 2.033847  | -2.251311 | 0.452978  | O | -4.209769 | 2.06967   | -0.573893 |
| O | 0.402305  | -0.243219 | -0.554022 | O | -0.591593 | 0.142136  | -0.715019 |
| O | 4.890665  | 0.520873  | 1.011286  | O | -5.216108 | -0.178634 | 0.603215  |
| O | 1.82264   | 4.120563  | 0.106836  | O | -2.35869  | -4.034513 | 0.254967  |
| O | -2.039379 | 0.090146  | 0.77458   | O | 2.658183  | -1.488978 | -0.551539 |
| H | 4.169902  | 3.048953  | 0.861292  | H | -4.664931 | -2.742691 | 0.74141   |
| H | -4.830149 | 1.127983  | 1.0166    | H | 4.952286  | 0.326307  | -1.617395 |
| H | -0.895534 | 2.364441  | 0.216847  | H | 0.459596  | -2.672535 | 0.239541  |
| H | -0.405549 | 2.802591  | -1.428837 | H | -0.039494 | -2.926901 | -1.425957 |
| H | -0.546352 | 0.562867  | -2.202612 | H | 0.647355  | -0.792876 | -2.064938 |
| H | -5.948166 | 0.199513  | 2.78159   | H | 6.89593   | -1.649857 | 0.384816  |
| H | -7.405088 | -0.696467 | 2.30316   | H | 6.853447  | -0.87825  | -1.2155   |
| H | -5.951573 | -1.576268 | 2.758789  | H | 7.834283  | -0.190208 | 0.095665  |
| H | -7.425259 | -1.878051 | -0.05612  | H | 4.838125  | 1.051372  | 2.113109  |
| H | -6.01941  | -2.798345 | 0.461432  | H | 6.606706  | 1.008159  | 2.080878  |
| H | -5.956175 | -1.86039  | -1.041427 | H | 5.705791  | -0.47264  | 2.37639   |
| H | 3.705442  | -2.454697 | -2.270567 | H | -2.790101 | 2.888775  | 2.227626  |
| H | 3.448008  | -3.805057 | -1.149763 | H | -3.393547 | 4.04104   | 1.021133  |
| H | 5.088418  | -3.411358 | -1.709533 | H | -1.731167 | 4.181393  | 1.63501   |
| H | 5.911907  | -3.223828 | 0.688456  | H | -0.8085   | 4.122426  | -0.735597 |
| H | 4.296402  | -3.582468 | 1.333423  | H | -2.43496  | 3.944989  | -1.428274 |
| H | 5.141221  | -2.096695 | 1.820437  | H | -1.170096 | 2.756977  | -1.808531 |
| H | -2.223493 | -1.378984 | -2.274186 | H | 0.897488  | 0.576859  | 1.488159  |
| H | -3.093893 | -1.788535 | -0.779348 | H | 2.516166  | -0.094473 | 1.749155  |
| H | -1.332837 | -1.978026 | -0.863611 | H | 1.125975  | -1.17516  | 1.673507  |
| H | -4.69163  | -0.369199 | -1.686071 | H | 3.475016  | 1.724534  | 0.7229    |

|                |           |           |           |                |           |           |           |
|----------------|-----------|-----------|-----------|----------------|-----------|-----------|-----------|
| H              | -5.178789 | 1.305598  | -1.572837 | H              | 3.76582   | 2.442922  | -0.845444 |
| H              | -3.023213 | 1.971598  | -0.6079   | H              | 2.407183  | 0.723251  | -1.980718 |
| H              | -2.898067 | 1.263958  | -2.213203 | H              | 1.496573  | 1.672462  | -0.809143 |
| H              | 4.977689  | -1.223185 | -0.503059 | H              | -1.151689 | 1.997561  | 0.562121  |
| H              | 5.462149  | 1.279033  | 1.216691  | H              | -5.815761 | -0.876807 | 0.914503  |
| H              | 2.592571  | 4.652207  | 0.368999  | H              | -3.175453 | -4.485998 | 0.525629  |
| H              | -1.286872 | -0.454682 | 1.065095  | H              | 3.549163  | -1.199958 | -0.280248 |
| <b>3b (13)</b> |           |           |           | <b>3b (14)</b> |           |           |           |
| C              | -3.108745 | -1.541997 | 1.534467  | C              | 3.264186  | 2.58646   | 0.201608  |
| C              | -2.11327  | 0.194079  | 0.0904    | C              | 2.937917  | 0.184227  | -0.260191 |
| C              | -1.235104 | -2.120932 | 0.12801   | C              | 1.038744  | 1.770779  | -0.252823 |
| C              | -1.206605 | -0.805599 | -0.322106 | C              | 1.569916  | 0.496065  | -0.423339 |
| C              | -3.067183 | -0.231397 | 1.052925  | C              | 3.76956   | 1.294697  | 0.044612  |
| C              | -2.191456 | -2.494836 | 1.066383  | C              | 1.886881  | 2.823025  | 0.070997  |
| C              | 4.016341  | 0.783674  | 0.273288  | C              | -5.529373 | 0.242107  | 0.507255  |
| C              | -2.008182 | 1.577321  | -0.449523 | C              | 3.423247  | -1.214771 | -0.40851  |
| C              | 4.24318   | 1.871545  | 1.028853  | C              | -6.696374 | -0.216346 | 0.026174  |
| C              | -0.154462 | -2.916417 | -0.555684 | C              | -0.457159 | 1.716672  | -0.399271 |
| C              | 0.533029  | -1.835214 | -1.431877 | C              | -0.687049 | 0.230486  | -0.791136 |
| C              | 4.602824  | 3.191474  | 0.385224  | C              | -7.889173 | 0.702339  | -0.106429 |
| C              | 4.172495  | 1.91981   | 2.536717  | C              | -6.953339 | -1.636446 | -0.417869 |
| C              | -3.316775 | 2.827028  | -2.17483  | C              | 5.769042  | -2.134069 | -0.370256 |
| C              | -3.24997  | 3.661513  | 0.22351   | C              | 4.021431  | -2.957706 | 1.278988  |
| C              | 2.893564  | -2.674039 | -1.565255 | C              | -1.647227 | -2.037913 | -0.235695 |
| C              | 3.65005   | -0.605985 | 0.7311    | C              | -4.235386 | -0.503297 | 0.708457  |
| C              | 2.229225  | -1.077271 | 0.328189  | C              | -3.109012 | 0.058872  | -0.18301  |
| C              | -3.267652 | 2.422691  | -0.689764 | C              | 4.551963  | -1.747316 | 0.488177  |
| C              | 2.01713   | -1.492174 | -1.146351 | C              | -1.702304 | -0.535998 | 0.079632  |
| O              | -0.913293 | 2.038302  | -0.76706  | O              | 2.883132  | -1.984105 | -1.200733 |
| O              | -0.238067 | -0.59958  | -1.251587 | O              | 0.619477  | -0.425994 | -0.709091 |
| O              | -3.927717 | 0.705839  | 1.5434    | O              | 5.112837  | 1.068325  | 0.12856   |
| O              | -2.187396 | -3.784451 | 1.494631  | O              | 1.334441  | 4.054043  | 0.241021  |
| O              | 2.358592  | -0.416132 | -2.037793 | O              | -1.299627 | -0.302797 | 1.439779  |
| H              | -3.844457 | -1.81808  | 2.286331  | H              | 3.941047  | 3.411082  | 0.412913  |
| H              | 4.090993  | 0.899101  | -0.806324 | H              | -5.484064 | 1.297476  | 0.784707  |
| H              | 0.537623  | -3.382712 | 0.15431   | H              | -0.96277  | 1.962821  | 0.540364  |
| H              | -0.56176  | -3.723787 | -1.174751 | H              | -0.837458 | 2.396246  | -1.169014 |
| H              | 0.457242  | -2.072914 | -2.496609 | H              | -0.998887 | 0.142526  | -1.837082 |
| H              | 4.647529  | 3.115574  | -0.706034 | H              | -8.234572 | 0.753089  | -1.148676 |
| H              | 3.87104   | 3.970193  | 0.643593  | H              | -8.740221 | 0.332188  | 0.482634  |
| H              | 5.577268  | 3.554663  | 0.742236  | H              | -7.661639 | 1.719949  | 0.226957  |
| H              | 3.904181  | 0.964009  | 2.992791  | H              | -7.762696 | -2.086281 | 0.17401   |
| H              | 3.434867  | 2.666106  | 2.863523  | H              | -6.07751  | -2.284027 | -0.334647 |

|                |           |           |           |                |           |           |           |
|----------------|-----------|-----------|-----------|----------------|-----------|-----------|-----------|
| H              | 5.136659  | 2.235629  | 2.959506  | H              | -7.289315 | -1.656834 | -1.463862 |
| H              | -3.366624 | 1.948535  | -2.828868 | H              | 5.4868    | -2.885201 | -1.116198 |
| H              | -2.427913 | 3.404398  | -2.447591 | H              | 6.560253  | -2.556176 | 0.259843  |
| H              | -4.20305  | 3.441975  | -2.367591 | H              | 6.177856  | -1.263127 | -0.892693 |
| H              | -3.268741 | 3.375702  | 1.280228  | H              | 3.689337  | -3.747552 | 0.59791   |
| H              | -4.124472 | 4.29144   | 0.025061  | H              | 3.174677  | -2.680105 | 1.917756  |
| H              | -2.348713 | 4.256946  | 0.040852  | H              | 4.810686  | -3.362666 | 1.922377  |
| H              | 2.726047  | -3.54295  | -0.921061 | H              | -2.334121 | -2.595839 | 0.410293  |
| H              | 3.951563  | -2.404051 | -1.507777 | H              | -0.636452 | -2.419154 | -0.075098 |
| H              | 2.676721  | -2.959748 | -2.60012  | H              | -1.934557 | -2.23353  | -1.27484  |
| H              | 4.391138  | -1.320147 | 0.345635  | H              | -3.931525 | -0.397144 | 1.760607  |
| H              | 3.715225  | -0.675458 | 1.821725  | H              | -4.365655 | -1.573915 | 0.525572  |
| H              | 1.517257  | -0.278518 | 0.56961   | H              | -3.060481 | 1.144546  | -0.031691 |
| H              | 1.967845  | -1.931716 | 0.964691  | H              | -3.372499 | -0.100719 | -1.236608 |
| H              | -4.153108 | 1.828197  | -0.456911 | H              | 4.852803  | -0.970396 | 1.193572  |
| H              | -4.523221 | 0.291575  | 2.189351  | H              | 5.567505  | 1.89786   | 0.349493  |
| H              | -2.894544 | -3.916246 | 2.14801   | H              | 2.025954  | 4.6928    | 0.481476  |
| H              | 1.745858  | 0.310833  | -1.82859  | H              | -1.763528 | -0.944889 | 1.9994    |
| <b>3b (15)</b> |           |           |           | <b>3b (16)</b> |           |           |           |
| C              | -4.029083 | -1.144732 | -0.493821 | C              | -4.044863 | -1.143645 | -0.379209 |
| C              | -2.24088  | 0.542907  | -0.272121 | C              | -2.265344 | 0.507922  | 0.06262   |
| C              | -1.727462 | -1.869697 | -0.494097 | C              | -1.738281 | -1.840861 | -0.517169 |
| C              | -1.337955 | -0.538781 | -0.376981 | C              | -1.357873 | -0.548287 | -0.169631 |
| C              | -3.612417 | 0.180197  | -0.353162 | C              | -3.635019 | 0.148884  | -0.046267 |
| C              | -3.081886 | -2.177984 | -0.553687 | C              | -3.091405 | -2.143759 | -0.622721 |
| C              | 4.822711  | 0.053177  | 0.035374  | C              | 4.825328  | 0.065197  | 0.028706  |
| C              | -1.741391 | 1.933384  | -0.093138 | C              | -1.776818 | 1.868569  | 0.418882  |
| C              | 5.227447  | 1.164803  | -0.600344 | C              | 5.195516  | 1.271321  | -0.431754 |
| C              | -0.5107   | -2.75469  | -0.51763  | C              | -0.513756 | -2.688455 | -0.734264 |
| C              | 0.635461  | -1.72072  | -0.353024 | C              | 0.627328  | -1.675353 | -0.447366 |
| C              | 6.477701  | 1.892834  | -0.162489 | C              | 6.460401  | 1.93183   | 0.066801  |
| C              | 4.522692  | 1.795444  | -1.777436 | C              | 4.434723  | 2.078945  | -1.455889 |
| C              | -3.027606 | 4.097811  | -0.132337 | C              | -1.523359 | 3.961563  | -0.924198 |
| C              | -1.611937 | 3.466188  | 1.879274  | C              | -3.066707 | 3.925158  | 1.092807  |
| C              | 0.701324  | -1.823417 | 2.201088  | C              | 0.83425   | -2.20874  | 2.043368  |
| C              | 3.616046  | -0.806353 | -0.238909 | C              | 3.612268  | -0.752571 | -0.330825 |
| C              | 2.638967  | -0.816238 | 0.95406   | C              | 2.691042  | -0.971925 | 0.886803  |
| C              | -2.526753 | 2.94496   | 0.756225  | C              | -2.508254 | 3.118656  | -0.092884 |
| C              | 1.519793  | -1.884141 | 0.903853  | C              | 1.581368  | -2.036085 | 0.713348  |
| O              | -0.660161 | 2.273697  | -0.569211 | O              | -0.746748 | 2.009444  | 1.074758  |
| O              | 0.011537  | -0.398502 | -0.314429 | O              | -0.008638 | -0.397102 | -0.134107 |
| O              | -4.532837 | 1.186884  | -0.338979 | O              | -4.561636 | 1.108655  | 0.239143  |
| O              | -3.428999 | -3.486549 | -0.676418 | O              | -3.43174  | -3.416446 | -0.958696 |



|                |           |           |           |                |           |           |           |
|----------------|-----------|-----------|-----------|----------------|-----------|-----------|-----------|
| O              | 2.081773  | -3.197137 | 0.730731  | O              | 2.144453  | -3.290307 | 0.290639  |
| H              | -5.089669 | -1.37204  | -0.572053 | H              | -5.105698 | -1.376539 | -0.431987 |
| H              | 5.429955  | -0.286662 | 0.877598  | H              | 5.471097  | -0.401131 | 0.776417  |
| H              | -0.507311 | -3.500434 | 0.283317  | H              | -0.467361 | -3.55653  | -0.069099 |
| H              | -0.411422 | -3.304047 | -1.460627 | H              | -0.44894  | -3.072929 | -1.758264 |
| H              | 1.282993  | -1.7263   | -1.232525 | H              | 1.224359  | -1.509738 | -1.347078 |
| H              | 7.208587  | 1.951256  | -0.981553 | H              | 7.15685   | 2.128579  | -0.760711 |
| H              | 6.251108  | 2.930023  | 0.122647  | H              | 6.242898  | 2.907245  | 0.524706  |
| H              | 6.960896  | 1.403853  | 0.689632  | H              | 6.979052  | 1.315698  | 0.808419  |
| H              | 4.259001  | 2.838564  | -1.554252 | H              | 4.159665  | 3.060238  | -1.044802 |
| H              | 3.607789  | 1.273666  | -2.066985 | H              | 3.519577  | 1.59227   | -1.800887 |
| H              | 5.185166  | 1.826373  | -2.653881 | H              | 5.062761  | 2.278719  | -2.335367 |
| H              | -2.184962 | 4.588112  | -0.632348 | H              | -0.666196 | 4.266243  | -0.315471 |
| H              | -3.548983 | 4.846343  | 0.475206  | H              | -2.022119 | 4.863212  | -1.297057 |
| H              | -3.722109 | 3.736286  | -0.897485 | H              | -1.146307 | 3.402168  | -1.788414 |
| H              | -0.724851 | 3.95176   | 1.460912  | H              | -2.258588 | 4.210814  | 1.775261  |
| H              | -1.278106 | 2.653185  | 2.534814  | H              | -3.805458 | 3.344372  | 1.654518  |
| H              | -2.150296 | 4.196205  | 2.494142  | H              | -3.553052 | 4.839619  | 0.734494  |
| H              | 1.359991  | -1.98142  | 3.063348  | H              | 1.539639  | -2.509093 | 2.827329  |
| H              | -0.072318 | -2.596594 | 2.22564   | H              | 0.062015  | -2.980814 | 1.975564  |
| H              | 0.224956  | -0.84545  | 2.320136  | H              | 0.366896  | -1.269867 | 2.355857  |
| H              | 3.100072  | -0.475969 | -1.145573 | H              | 3.054152  | -0.284383 | -1.147431 |
| H              | 3.940845  | -1.840154 | -0.421729 | H              | 3.934096  | -1.737971 | -0.695684 |
| H              | 2.178661  | 0.172629  | 1.061855  | H              | 2.226044  | -0.02222  | 1.175149  |
| H              | 3.210433  | -0.990977 | 1.877407  | H              | 3.307498  | -1.284866 | 1.742419  |
| H              | -3.389638 | 2.450127  | 1.205837  | H              | -3.339167 | 2.815285  | -0.732819 |
| H              | -5.425924 | 0.807783  | -0.387357 | H              | -5.453327 | 0.739421  | 0.128476  |
| H              | -4.396899 | -3.568205 | -0.704366 | H              | -4.399159 | -3.495972 | -1.004724 |
| H              | 2.647105  | -3.374768 | 1.500512  | H              | 2.749976  | -3.585965 | 0.990353  |
| <b>3b (17)</b> |           |           |           | <b>3b (18)</b> |           |           |           |
| C              | 2.885016  | 2.727335  | 0.260349  | C              | -4.025956 | -1.577587 | -0.33455  |
| C              | 2.884079  | 0.299076  | -0.18648  | C              | -2.504136 | 0.366642  | -0.306297 |
| C              | 0.824189  | 1.657449  | -0.394482 | C              | -1.642223 | -1.954432 | -0.354411 |
| C              | 1.511203  | 0.450847  | -0.487036 | C              | -1.452542 | -0.575689 | -0.357429 |
| C              | 3.547463  | 1.501422  | 0.179149  | C              | -3.807947 | -0.198728 | -0.314669 |
| C              | 1.510727  | 2.803919  | -0.01285  | C              | -2.936667 | -2.461785 | -0.341344 |
| C              | -5.578859 | -0.726693 | -0.335172 | C              | 4.450379  | 1.056224  | -0.503305 |
| C              | 3.536934  | -1.035667 | -0.268381 | C              | -2.214569 | 1.825542  | -0.252184 |
| C              | -6.52441  | -0.04917  | 0.335941  | C              | 5.792692  | 1.067037  | -0.45999  |
| C              | -0.63323  | 1.432219  | -0.690273 | C              | -0.308505 | -2.65142  | -0.345054 |
| C              | -0.654035 | -0.074891 | -1.06801  | C              | 0.67503   | -1.450276 | -0.346801 |
| C              | -7.833731 | 0.308448  | -0.329221 | C              | 6.553508  | 2.372921  | -0.43752  |
| C              | -6.408047 | 0.413354  | 1.768457  | C              | 6.667854  | -0.163119 | -0.433733 |

|                |           |           |           |                |           |           |           |
|----------------|-----------|-----------|-----------|----------------|-----------|-----------|-----------|
| C              | 5.981314  | -1.606679 | -0.068738 | C              | -3.800319 | 3.772474  | -0.422714 |
| C              | 4.264849  | -2.708897 | 1.443867  | C              | -2.281038 | 3.510413  | 1.596235  |
| C              | -1.393546 | -2.432912 | -0.554484 | C              | 0.932584  | -1.317673 | 2.192156  |
| C              | -4.219198 | -1.169415 | 0.140649  | C              | 3.517762  | -0.127061 | -0.52359  |
| C              | -3.087571 | -0.522223 | -0.684436 | C              | 2.605127  | -0.153993 | 0.719195  |
| C              | 4.663481  | -1.418887 | 0.704404  | C              | -3.12617  | 2.777278  | 0.538427  |
| C              | -1.65272  | -0.944385 | -0.278829 | C              | 1.659646  | -1.373127 | 0.841223  |
| O              | 3.142934  | -1.875355 | -1.075779 | O              | -1.205493 | 2.281614  | -0.786152 |
| O              | 0.704972  | -0.575258 | -0.849056 | O              | -0.1379   | -0.234588 | -0.354655 |
| O              | 4.891899  | 1.437649  | 0.403302  | O              | -4.866293 | 0.660909  | -0.354434 |
| O              | 0.809096  | 3.96573   | 0.071568  | O              | -3.086839 | -3.812727 | -0.343821 |
| O              | -1.409106 | -0.649588 | 1.107066  | O              | 2.399234  | -2.601905 | 0.724577  |
| H              | 3.440225  | 3.624615  | 0.523282  | H              | -5.042168 | -1.964003 | -0.361486 |
| H              | -5.798308 | -0.99621  | -1.370579 | H              | 3.944755  | 2.024451  | -0.514943 |
| H              | -1.258799 | 1.630536  | 0.1863    | H              | -0.169662 | -3.294754 | 0.529548  |
| H              | -1.004678 | 2.054969  | -1.510782 | H              | -0.158083 | -3.282592 | -1.227773 |
| H              | -0.852415 | -0.211585 | -2.136147 | H              | 1.251431  | -1.436804 | -1.27467  |
| H              | -8.684855 | -0.123104 | 0.216335  | H              | 7.181607  | 2.44907   | 0.461435  |
| H              | -7.99021  | 1.396437  | -0.333618 | H              | 7.235067  | 2.448426  | -1.296701 |
| H              | -7.877743 | -0.046095 | -1.364029 | H              | 5.882855  | 3.23797   | -0.458367 |
| H              | -6.530134 | 1.50351   | 1.832271  | H              | 7.350127  | -0.170693 | -1.295271 |
| H              | -5.453602 | 0.154675  | 2.232422  | H              | 6.102246  | -1.097558 | -0.445858 |
| H              | -7.209535 | -0.02255  | 2.381032  | H              | 7.304212  | -0.164693 | 0.462244  |
| H              | 5.864877  | -2.374794 | -0.841489 | H              | -3.044104 | 4.339962  | -0.976547 |
| H              | 6.779443  | -1.923354 | 0.612467  | H              | -4.420593 | 4.48175   | 0.137076  |
| H              | 6.294629  | -0.674883 | -0.550209 | H              | -4.441891 | 3.254882  | -1.1432   |
| H              | 4.102081  | -3.526431 | 0.734756  | H              | -1.478467 | 4.083642  | 1.121834  |
| H              | 3.343775  | -2.571488 | 2.022435  | H              | -1.825242 | 2.807206  | 2.303294  |
| H              | 5.058902  | -3.004468 | 2.138806  | H              | -2.910774 | 4.201978  | 2.167205  |
| H              | -2.07697  | -3.061504 | 0.026745  | H              | 1.665795  | -1.308631 | 3.007417  |
| H              | -0.368775 | -2.693405 | -0.280994 | H              | 0.283345  | -2.186326 | 2.336528  |
| H              | -1.543249 | -2.669983 | -1.613799 | H              | 0.32766   | -0.409646 | 2.276514  |
| H              | -4.075817 | -0.928696 | 1.19894   | H              | 2.897722  | -0.063483 | -1.429434 |
| H              | -4.156965 | -2.263517 | 0.053577  | H              | 4.062862  | -1.073123 | -0.58593  |
| H              | -3.17738  | 0.566246  | -0.585254 | H              | 2.000097  | 0.759947  | 0.757022  |
| H              | -3.23438  | -0.754609 | -1.747821 | H              | 3.239778  | -0.139537 | 1.616475  |
| H              | 4.799012  | -0.620532 | 1.436583  | H              | -3.901963 | 2.201057  | 1.045792  |
| H              | 5.218308  | 2.318672  | 0.650061  | H              | -5.695077 | 0.154304  | -0.344025 |
| H              | 1.399998  | 4.685722  | 0.348345  | H              | -4.031933 | -4.03784  | -0.327108 |
| H              | -1.86925  | -1.319101 | 1.637008  | H              | 3.041673  | -2.623246 | 1.452945  |
| <b>3b (19)</b> |           |           |           | <b>3b (20)</b> |           |           |           |
| C              | 2.992191  | 2.8528    | 0.076718  | C              | -4.351583 | -0.453098 | -0.364581 |
| C              | 3.02723   | 0.38812   | 0.171685  | C              | -2.35854  | 0.915472  | 0.129268  |

|   |           |           |           |   |           |           |           |
|---|-----------|-----------|-----------|---|-----------|-----------|-----------|
| C | 0.971497  | 1.632885  | -0.422694 | C | -2.167121 | -1.46478  | -0.528379 |
| C | 1.666918  | 0.451187  | -0.192443 | C | -1.611989 | -0.24562  | -0.155851 |
| C | 3.665871  | 1.652564  | 0.317633  | C | -3.770108 | 0.757487  | 0.021757  |
| C | 1.636717  | 2.845501  | -0.285138 | C | -3.549384 | -1.571381 | -0.635249 |
| C | -5.434936 | -0.757546 | -0.340406 | C | 4.61356   | -0.554408 | -0.081666 |
| C | 3.754561  | -0.889072 | 0.407196  | C | -1.742549 | 2.209829  | 0.530557  |
| C | -6.422783 | 0.071921  | 0.033283  | C | 5.125775  | 0.626434  | -0.465033 |
| C | -0.470126 | 1.321866  | -0.716957 | C | -1.078825 | -2.487382 | -0.711325 |
| C | -0.462603 | -0.230949 | -0.757736 | C | 0.196279  | -1.649934 | -0.42316  |
| C | -7.662635 | 0.225021  | -0.81755  | C | 6.506052  | 1.050435  | -0.0182   |
| C | -6.422169 | 0.911403  | 1.288197  | C | 4.423333  | 1.629629  | -1.348183 |
| C | 3.127584  | -3.334376 | 0.34342   | C | 0.640118  | 2.907285  | 0.974505  |
| C | 4.721282  | -2.341674 | -1.368231 | C | -0.684715 | 3.920609  | -0.942516 |
| C | -1.26935  | -2.432582 | 0.18299   | C | 0.411214  | -2.306933 | 2.036875  |
| C | -4.128127 | -1.040889 | 0.354746  | C | 3.269867  | -1.151909 | -0.409854 |
| C | -2.92191  | -0.60989  | -0.505165 | C | 2.393007  | -1.313752 | 0.848538  |
| C | 3.470936  | -2.096647 | -0.499622 | C | -0.417511 | 2.650689  | -0.111146 |
| C | -1.532881 | -0.921594 | 0.108874  | C | 1.127157  | -2.189157 | 0.684319  |
| O | 4.626527  | -0.982257 | 1.26688   | O | -2.297764 | 2.965313  | 1.323868  |
| O | 0.872506  | -0.646216 | -0.312549 | O | -0.254869 | -0.309619 | -0.042991 |
| O | 4.985178  | 1.666032  | 0.651676  | O | -4.553269 | 1.844039  | 0.259863  |
| O | 0.930782  | 3.986234  | -0.508366 | O | -4.065188 | -2.775251 | -0.999228 |
| O | -1.410675 | -0.335488 | 1.415413  | O | 1.481165  | -3.493623 | 0.191824  |
| H | 3.522195  | 3.79762   | 0.173693  | H | -5.432974 | -0.52714  | -0.455227 |
| H | -5.568521 | -1.302223 | -1.277561 | H | 5.232272  | -1.177665 | 0.568074  |
| H | -1.133013 | 1.694132  | 0.071338  | H | -1.177427 | -3.338276 | -0.029457 |
| H | -0.813555 | 1.743476  | -1.667153 | H | -1.053408 | -2.898947 | -1.72602  |
| H | -0.562949 | -0.597125 | -1.784788 | H | 0.779285  | -1.528808 | -1.339071 |
| H | -8.565707 | -0.046587 | -0.252812 | H | 7.162714  | 1.231489  | -0.881015 |
| H | -7.798494 | 1.269326  | -1.13252  | H | 6.467035  | 1.994981  | 0.542749  |
| H | -7.622609 | -0.398983 | -1.71617  | H | 6.980702  | 0.296227  | 0.617768  |
| H | -6.522104 | 1.97681   | 1.038654  | H | 4.335142  | 2.597671  | -0.835357 |
| H | -5.519151 | 0.79096   | 1.890784  | H | 3.420441  | 1.317455  | -1.648404 |
| H | -7.285413 | 0.660909  | 1.920347  | H | 5.005505  | 1.817431  | -2.261278 |
| H | 3.939264  | -3.557337 | 1.043822  | H | 0.284858  | 3.662369  | 1.683867  |
| H | 2.978198  | -4.207394 | -0.301838 | H | 1.571183  | 3.268053  | 0.522992  |
| H | 2.210191  | -3.179246 | 0.922315  | H | 0.866052  | 1.992048  | 1.532834  |
| H | 5.590877  | -2.555604 | -0.737836 | H | -1.069975 | 4.723352  | -0.305302 |
| H | 4.956271  | -1.470017 | -1.990286 | H | -1.416823 | 3.734221  | -1.737089 |
| H | 4.556651  | -3.196829 | -2.033302 | H | 0.242885  | 4.265819  | -1.412709 |
| H | -2.02467  | -2.929686 | 0.801378  | H | 1.093811  | -2.733158 | 2.78155   |
| H | -0.287772 | -2.622721 | 0.622766  | H | -0.463941 | -2.960201 | 1.973149  |
| H | -1.301147 | -2.889306 | -0.812511 | H | 0.090566  | -1.325312 | 2.398811  |

|                |           |           |           |                |           |           |           |
|----------------|-----------|-----------|-----------|----------------|-----------|-----------|-----------|
| H              | -4.078828 | -0.532109 | 1.322794  | H              | 2.74715   | -0.547621 | -1.157603 |
| H              | -4.067645 | -2.119237 | 0.560241  | H              | 3.414437  | -2.146174 | -0.854914 |
| H              | -3.000834 | 0.470067  | -0.677667 | H              | 2.09797   | -0.325995 | 1.221451  |
| H              | -2.98564  | -1.09172  | -1.490049 | H              | 2.997974  | -1.771426 | 1.644861  |
| H              | 2.6297    | -1.868798 | -1.156847 | H              | -0.055723 | 1.866059  | -0.778484 |
| H              | 5.304397  | 2.583276  | 0.626804  | H              | -5.475866 | 1.614458  | 0.060001  |
| H              | 1.504781  | 4.758133  | -0.371001 | H              | -5.035014 | -2.721872 | -1.027409 |
| H              | -1.932619 | -0.874519 | 2.030189  | H              | 2.066349  | -3.903002 | 0.850473  |
| <b>3b (21)</b> |           |           |           | <b>3b (22)</b> |           |           |           |
| C              | -4.06917  | -1.599625 | 0.142965  | C              | -3.43739  | 2.607187  | -0.06803  |
| C              | -2.573182 | 0.359456  | 0.032545  | C              | -3.095669 | 0.165767  | -0.131232 |
| C              | -1.738373 | -1.932612 | -0.389575 | C              | -1.227284 | 1.722442  | 0.326198  |
| C              | -1.544953 | -0.560578 | -0.264885 | C              | -1.744123 | 0.443621  | 0.151685  |
| C              | -3.850472 | -0.224152 | 0.243807  | C              | -3.929738 | 1.312264  | -0.250438 |
| C              | -3.008805 | -2.458979 | -0.18285  | C              | -2.078129 | 2.815666  | 0.211364  |
| C              | 4.753958  | 1.027712  | 0.521473  | C              | 5.419238  | 0.483432  | -0.259462 |
| C              | -2.282391 | 1.815703  | 0.133703  | C              | -3.626375 | -1.213779 | -0.320853 |
| C              | 5.969802  | 1.116364  | -0.041807 | C              | 6.573003  | -0.065801 | 0.153574  |
| C              | -0.439477 | -2.593672 | -0.76394  | C              | 0.258759  | 1.641313  | 0.543382  |
| C              | 0.535534  | -1.386677 | -0.790591 | C              | 0.49561   | 0.106018  | 0.58826   |
| C              | 6.625956  | 2.461905  | -0.251161 | C              | 7.719726  | 0.805629  | 0.612015  |
| C              | 6.79625   | -0.05714  | -0.510518 | C              | 6.859276  | -1.547333 | 0.206729  |
| C              | -2.661804 | 3.700179  | -1.461319 | C              | -2.832786 | -3.61218  | -0.153283 |
| C              | -3.76076  | 3.731619  | 0.829613  | C              | -4.28312  | -2.567319 | 1.6535    |
| C              | 1.199001  | -1.51965  | 1.670193  | C              | 1.564251  | -1.955297 | -0.409537 |
| C              | 3.932523  | -0.203881 | 0.804186  | C              | 4.168583  | -0.20303  | -0.744165 |
| C              | 2.617905  | -0.209368 | -0.002837 | C              | 2.960464  | 0.107182  | 0.163333  |
| C              | -3.307513 | 2.852779  | -0.349148 | C              | -3.157439 | -2.329119 | 0.624266  |
| C              | 1.703715  | -1.437038 | 0.224056  | C              | 1.597132  | -0.421333 | -0.351722 |
| O              | -1.191717 | 2.205799  | 0.545723  | O              | -4.486827 | -1.458465 | -1.161438 |
| O              | -0.262526 | -0.192451 | -0.519516 | O              | -0.785496 | -0.517141 | 0.239027  |
| O              | -4.869383 | 0.607156  | 0.607188  | O              | -5.253351 | 1.112243  | -0.498224 |
| O              | -3.164806 | -3.804064 | -0.304234 | O              | -1.54387  | 4.055545  | 0.37636   |
| O              | 2.393067  | -2.646159 | -0.143499 | O              | 1.295426  | 0.126519  | -1.64543  |
| H              | -5.059623 | -2.00545  | 0.335447  | H              | -4.11261  | 3.45641   | -0.145506 |
| H              | 4.268488  | 1.962755  | 0.80931   | H              | 5.350885  | 1.573291  | -0.240586 |
| H              | -0.11925  | -3.357273 | -0.048332 | H              | 0.814045  | 2.103723  | -0.279444 |
| H              | -0.488622 | -3.081476 | -1.744046 | H              | 0.581611  | 2.120824  | 1.473231  |
| H              | 0.962738  | -1.250523 | -1.78859  | H              | 0.723412  | -0.227553 | 1.605918  |
| H              | 7.589231  | 2.51803   | 0.275348  | H              | 8.003338  | 0.571925  | 1.647937  |
| H              | 6.845508  | 2.632814  | -1.314602 | H              | 8.616509  | 0.632575  | 0.000372  |
| H              | 5.996161  | 3.28451   | 0.102576  | H              | 7.471818  | 1.870589  | 0.55859   |
| H              | 7.029701  | 0.039059  | -1.579982 | H              | 7.721194  | -1.797013 | -0.42764  |

|                |           |           |           |   |           |           |           |
|----------------|-----------|-----------|-----------|---|-----------|-----------|-----------|
| H              | 6.306573  | -1.021947 | -0.359866 | H | 6.017827  | -2.166038 | -0.113581 |
| H              | 7.761648  | -0.083494 | 0.013923  | H | 7.130855  | -1.849813 | 1.227598  |
| H              | -1.767469 | 4.208689  | -1.087776 | H | -3.700356 | -3.938235 | -0.735764 |
| H              | -3.369286 | 4.457509  | -1.817378 | H | -2.557066 | -4.417155 | 0.537111  |
| H              | -2.369447 | 3.082148  | -2.318451 | H | -1.996924 | -3.458328 | -0.845515 |
| H              | -2.898873 | 4.228731  | 1.288089  | H | -5.201081 | -2.892221 | 1.151497  |
| H              | -4.265106 | 3.135075  | 1.596846  | H | -4.50807  | -1.657749 | 2.222471  |
| H              | -4.459004 | 4.502258  | 0.483803  | H | -3.984255 | -3.345557 | 2.364561  |
| H              | 2.03772   | -1.636464 | 2.365004  | H | 2.3262    | -2.333708 | -1.099718 |
| H              | 0.534345  | -2.377287 | 1.811198  | H | 0.586955  | -2.298418 | -0.756353 |
| H              | 0.659527  | -0.608863 | 1.946739  | H | 1.760814  | -2.392649 | 0.575726  |
| H              | 4.500023  | -1.113473 | 0.580492  | H | 3.942545  | 0.158827  | -1.758509 |
| H              | 3.703324  | -0.231332 | 1.878945  | H | 4.318661  | -1.283589 | -0.821862 |
| H              | 2.870288  | -0.171608 | -1.070639 | H | 2.890056  | 1.19594   | 0.279175  |
| H              | 2.044574  | 0.698844  | 0.218995  | H | 3.146741  | -0.304854 | 1.1636    |
| H              | -4.178648 | 2.338391  | -0.759355 | H | -2.265719 | -1.998094 | 1.159982  |
| H              | -5.686128 | 0.091314  | 0.709229  | H | -5.710578 | 1.968634  | -0.462823 |
| H              | -4.092705 | -4.042398 | -0.141702 | H | -2.235986 | 4.728001  | 0.262799  |
| H              | 3.020774  | -2.854858 | 0.566028  | H | 1.83817   | -0.34136  | -2.299125 |
| <b>3b (23)</b> |           |           |           |   |           |           |           |
| C              | -4.348624 | -1.106434 | -0.171801 |   |           |           |           |
| C              | -2.652823 | 0.666558  | 0.084182  |   |           |           |           |
| C              | -2.018799 | -1.665617 | -0.457312 |   |           |           |           |
| C              | -1.704046 | -0.336494 | -0.197441 |   |           |           |           |
| C              | -4.004812 | 0.220092  | 0.101466  |   |           |           |           |
| C              | -3.353572 | -2.055576 | -0.448132 |   |           |           |           |
| C              | 4.352912  | 0.731738  | -0.232481 |   |           |           |           |
| C              | -2.289803 | 2.082629  | 0.364951  |   |           |           |           |
| C              | 5.688657  | 0.595836  | -0.265736 |   |           |           |           |
| C              | -0.757266 | -2.453099 | -0.684978 |   |           |           |           |
| C              | 0.337772  | -1.371542 | -0.47699  |   |           |           |           |
| C              | 6.591449  | 1.774669  | 0.016906  |   |           |           |           |
| C              | 6.420245  | -0.687425 | -0.578366 |   |           |           |           |
| C              | -0.089775 | 3.305658  | 0.541111  |   |           |           |           |
| C              | -1.750839 | 3.853157  | -1.302298 |   |           |           |           |
| C              | 0.649728  | -1.814897 | 2.020305  |   |           |           |           |
| C              | 3.293599  | -0.311653 | -0.476135 |   |           |           |           |
| C              | 2.41351   | -0.532403 | 0.770968  |   |           |           |           |
| C              | -1.146293 | 2.741363  | -0.422238 |   |           |           |           |
| C              | 1.345513  | -1.646399 | 0.66206   |   |           |           |           |
| O              | -2.923548 | 2.759089  | 1.170436  |   |           |           |           |
| O              | -0.358799 | -0.115111 | -0.19292  |   |           |           |           |
| O              | -4.977361 | 1.139263  | 0.346716  |   |           |           |           |

|   |           |           |           |  |  |  |  |
|---|-----------|-----------|-----------|--|--|--|--|
| O | -3.635394 | -3.359776 | -0.708348 |  |  |  |  |
| O | 1.952164  | -2.886121 | 0.255351  |  |  |  |  |
| H | -5.39521  | -1.402384 | -0.170909 |  |  |  |  |
| H | 3.958826  | 1.720818  | 0.01168   |  |  |  |  |
| H | -0.642497 | -3.290303 | 0.010256  |  |  |  |  |
| H | -0.70407  | -2.87345  | -1.695489 |  |  |  |  |
| H | 0.893663  | -1.210615 | -1.402911 |  |  |  |  |
| H | 7.252892  | 1.570048  | 0.870693  |  |  |  |  |
| H | 7.249054  | 1.983419  | -0.838937 |  |  |  |  |
| H | 6.021828  | 2.683217  | 0.23748   |  |  |  |  |
| H | 7.063196  | -0.561172 | -1.460691 |  |  |  |  |
| H | 5.752961  | -1.531186 | -0.76813  |  |  |  |  |
| H | 7.086588  | -0.963037 | 0.250832  |  |  |  |  |
| H | -0.547783 | 4.016236  | 1.237206  |  |  |  |  |
| H | 0.696938  | 3.826163  | -0.016447 |  |  |  |  |
| H | 0.380235  | 2.507351  | 1.126341  |  |  |  |  |
| H | -2.25043  | 4.604327  | -0.681742 |  |  |  |  |
| H | -2.485494 | 3.451236  | -2.009931 |  |  |  |  |
| H | -0.962031 | 4.348377  | -1.879527 |  |  |  |  |
| H | 1.391874  | -2.063777 | 2.787909  |  |  |  |  |
| H | -0.089887 | -2.620465 | 1.997417  |  |  |  |  |
| H | 0.150977  | -0.889719 | 2.32515   |  |  |  |  |
| H | 2.662859  | 0.023781  | -1.31217  |  |  |  |  |
| H | 3.727946  | -1.268552 | -0.779039 |  |  |  |  |
| H | 1.915093  | 0.405093  | 1.046245  |  |  |  |  |
| H | 3.067289  | -0.789474 | 1.616356  |  |  |  |  |
| H | -0.674755 | 2.000691  | -1.071022 |  |  |  |  |
| H | -5.84363  | 0.712704  | 0.239328  |  |  |  |  |
| H | -4.595646 | -3.502395 | -0.663996 |  |  |  |  |
| H | 2.602318  | -3.126646 | 0.935917  |  |  |  |  |

Key transitions, oscillator strengths, and rotatory strengths in the ECD of conformers **3b** (2) at B3LYP /6-311++G(d,p) level.

| Species       | Excited State | $\Delta E(eV)^a$ | $\lambda(nm)^b$ | $f^c$  | $R_{vel}^d$ |
|---------------|---------------|------------------|-----------------|--------|-------------|
| <b>3b</b> (2) | 94 -> 95      | 3.918700         | 316.39          | 0.0305 | -75.8784    |
|               | 91 ->106      | 3.937700         | 314.86          | 0.0308 | 53.8871     |
|               | 93 -> 95      | 4.528300         | 273.8           | 0.3085 | 40.2122     |
|               | 94 -> 95      | 4.620700         | 268.32          | 0.0115 | -0.367      |
|               | 94 ->104      | 5.112700         | 242.5           | 0.0023 | -1.5119     |
|               | 92 -> 97      | 5.387300         | 230.14          | 0.0899 | 14.9736     |
|               | 93 -> 96      | 5.478400         | 226.31          | 0.0012 | -1.3631     |
|               | 93 -> 98      | 5.484200         | 226.08          | 0.005  | -9.8991     |
|               | 92 -> 96      | 5.513300         | 224.88          | 0.0283 | 13.2656     |

|  |          |          |        |        |          |
|--|----------|----------|--------|--------|----------|
|  | 94 -> 98 | 5.520600 | 224.58 | 0.0927 | 1.4995   |
|  | 94 -> 96 | 5.555800 | 223.16 | 0.0171 | 1.65     |
|  | 94 -> 97 | 5.664500 | 218.88 | 0.023  | -0.0083  |
|  | 93 -> 96 | 5.783600 | 214.37 | 0.0029 | -5.345   |
|  | 93 -> 97 | 5.811700 | 213.33 | 0.0045 | -0.5347  |
|  | 93 -> 99 | 5.867800 | 211.29 | 0.0002 | -0.7141  |
|  | 92 -> 99 | 5.872700 | 211.12 | 0.0006 | -0.2906  |
|  | 92 ->100 | 5.895400 | 210.31 | 0.0057 | 4.8729   |
|  | 92 -> 98 | 5.906800 | 209.9  | 0.0048 | -2.7276  |
|  | 91 -> 97 | 5.917100 | 209.54 | 0.0137 | -0.5534  |
|  | 94 ->102 | 5.971800 | 207.62 | 0.0504 | -42.6022 |
|  | 91 -> 99 | 5.972500 | 207.59 | 0.004  | -3.7499  |
|  | 89 -> 95 | 5.981000 | 207.3  | 0.011  | -10.7148 |
|  | 94 ->101 | 6.009900 | 206.3  | 0.0104 | -3.0651  |
|  | 94 ->102 | 6.035900 | 205.41 | 0.0003 | -2.7403  |
|  | 93 ->101 | 6.073300 | 204.15 | 0.0798 | -4.896   |
|  | 94 ->103 | 6.089400 | 203.61 | 0.006  | 11.9507  |
|  | 93 ->102 | 6.128200 | 202.32 | 0.0403 | 10.4256  |
|  | 92 -> 97 | 6.162500 | 201.19 | 0.0472 | 9.4553   |
|  | 92 ->100 | 6.200500 | 199.96 | 0.0721 | 3.0761   |
|  | 93 ->101 | 6.238400 | 198.74 | 0.0833 | -20.8478 |
|  | 92 ->106 | 6.258400 | 198.11 | 0.0245 | 6.1696   |
|  | 92 ->102 | 6.321300 | 196.14 | 0.0684 | 31.3548  |
|  | 94 ->106 | 6.349800 | 195.26 | 0.1312 | -41.1168 |
|  | 91 ->100 | 6.367200 | 194.72 | 0.1481 | -2.2898  |
|  | 92 ->101 | 6.393300 | 193.93 | 0.0191 | -7.9926  |
|  | 91 -> 98 | 6.404700 | 193.58 | 0.0041 | 11.0496  |
|  | 92 ->104 | 6.407900 | 193.49 | 0.0043 | -4.4652  |
|  | 93 ->104 | 6.421300 | 193.08 | 0.0702 | 20.2539  |
|  | 91 ->104 | 6.446100 | 192.34 | 0.0119 | 25.4312  |
|  | 92 ->104 | 6.463700 | 191.82 | 0.0074 | -15.6493 |

<sup>a</sup>Excitation energy. <sup>b</sup>Wavelength. <sup>c</sup>Oscillator strength. <sup>d</sup>Rotatory strength in velocity form ( $10^{-40}$ cgs.).

HRESIMS of compound **1**

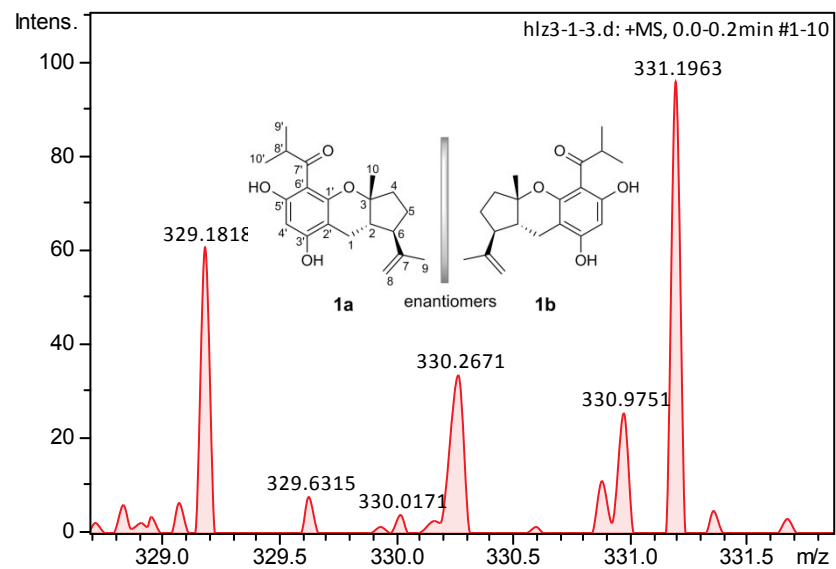



<sup>1</sup>H NMR of compound **1** (in methanol-*d*<sub>4</sub>)

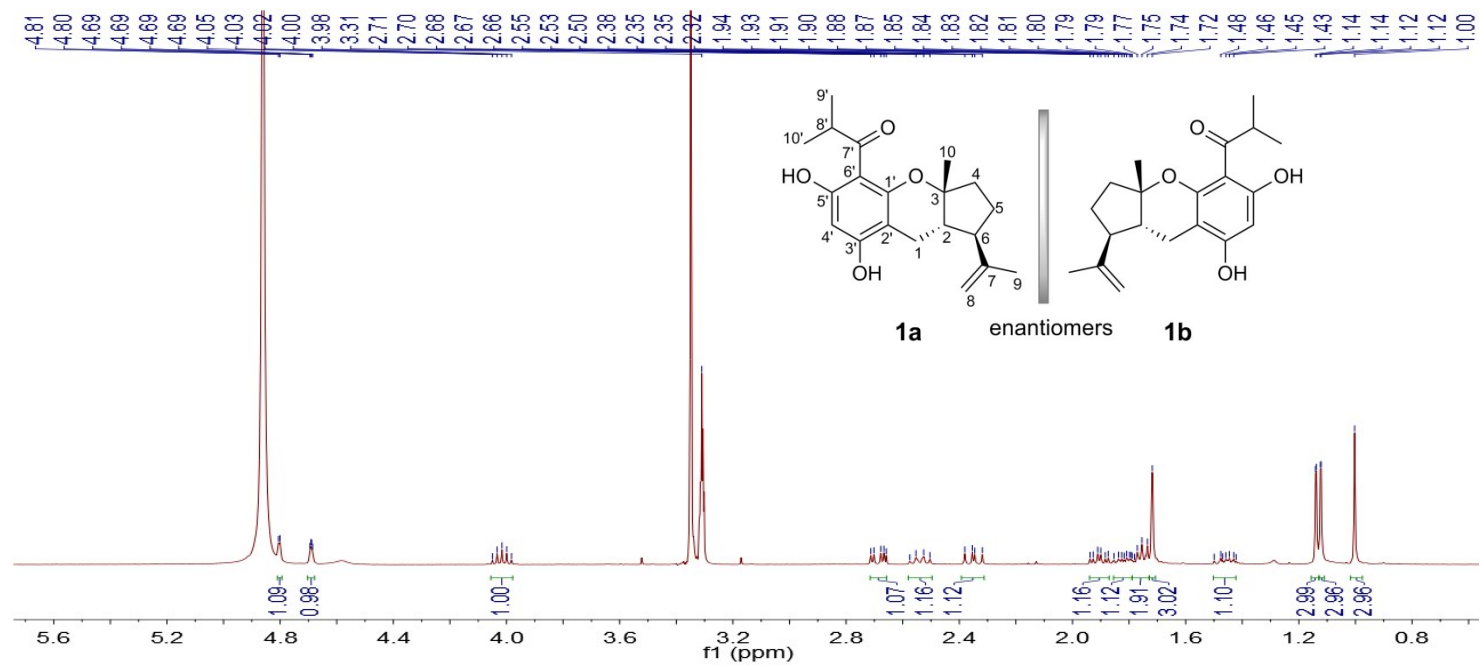

$^{13}\text{C}$  NMR of compound **1** (in methanol- $d_4$ )

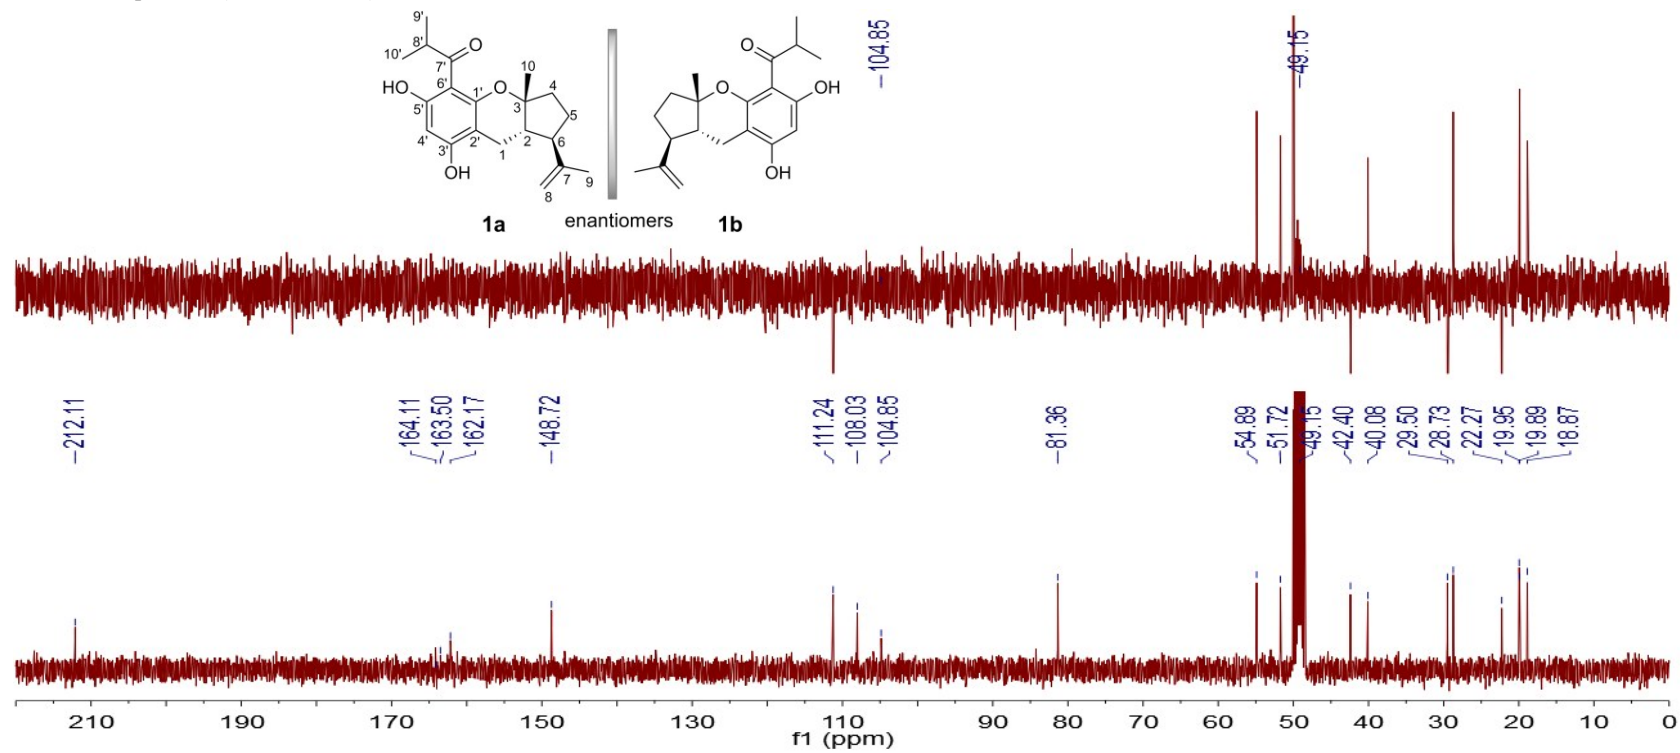

HSQC of compound **1** (in methanol-*d*<sub>4</sub>)

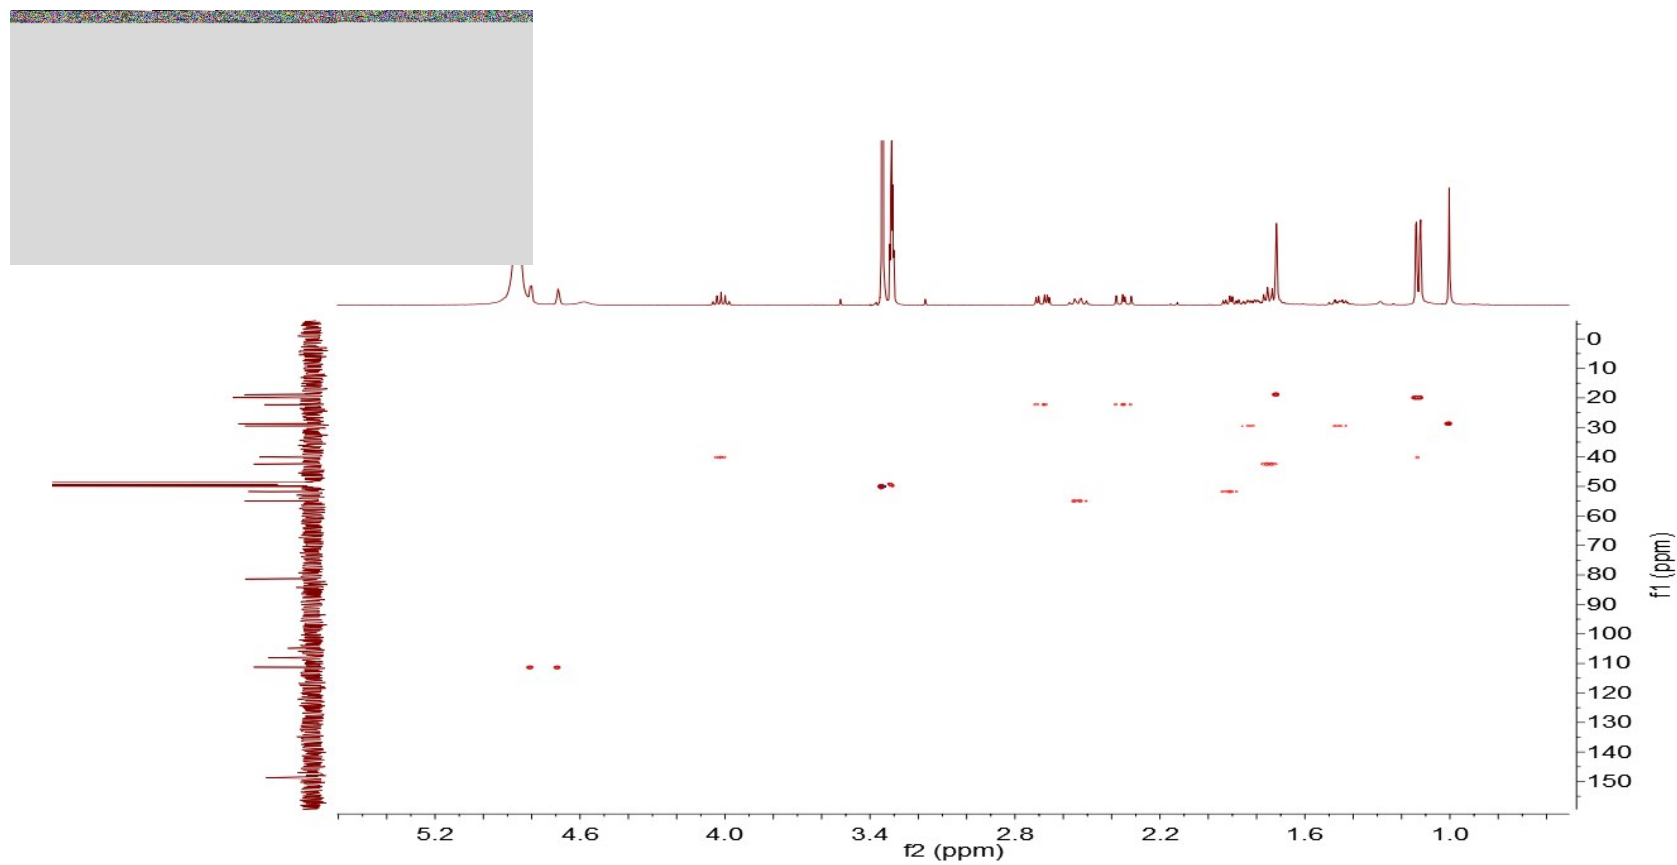

HMBC of compound 1 (in methanol-*d*<sub>4</sub>)

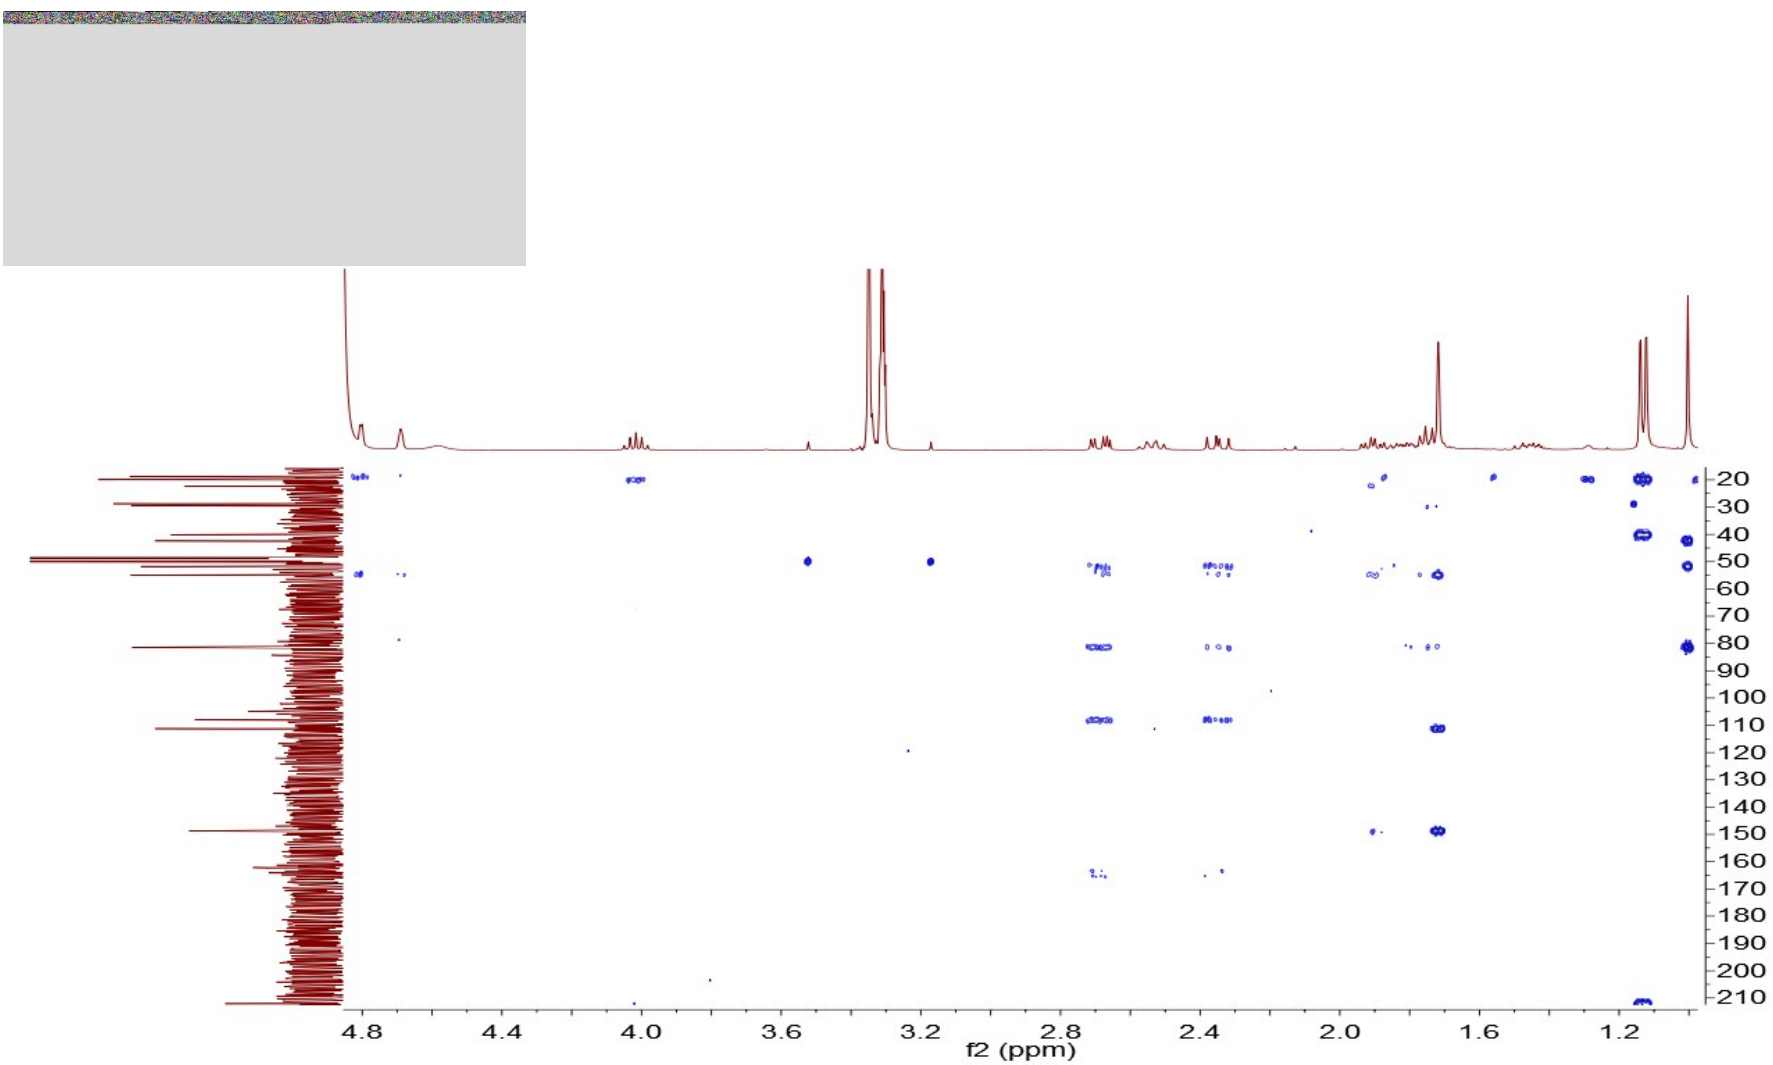

$^1\text{H}$ - $^1\text{H}$  COSY of compound **1** (in methanol- $d_4$ )

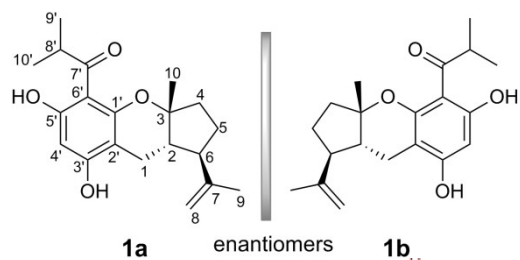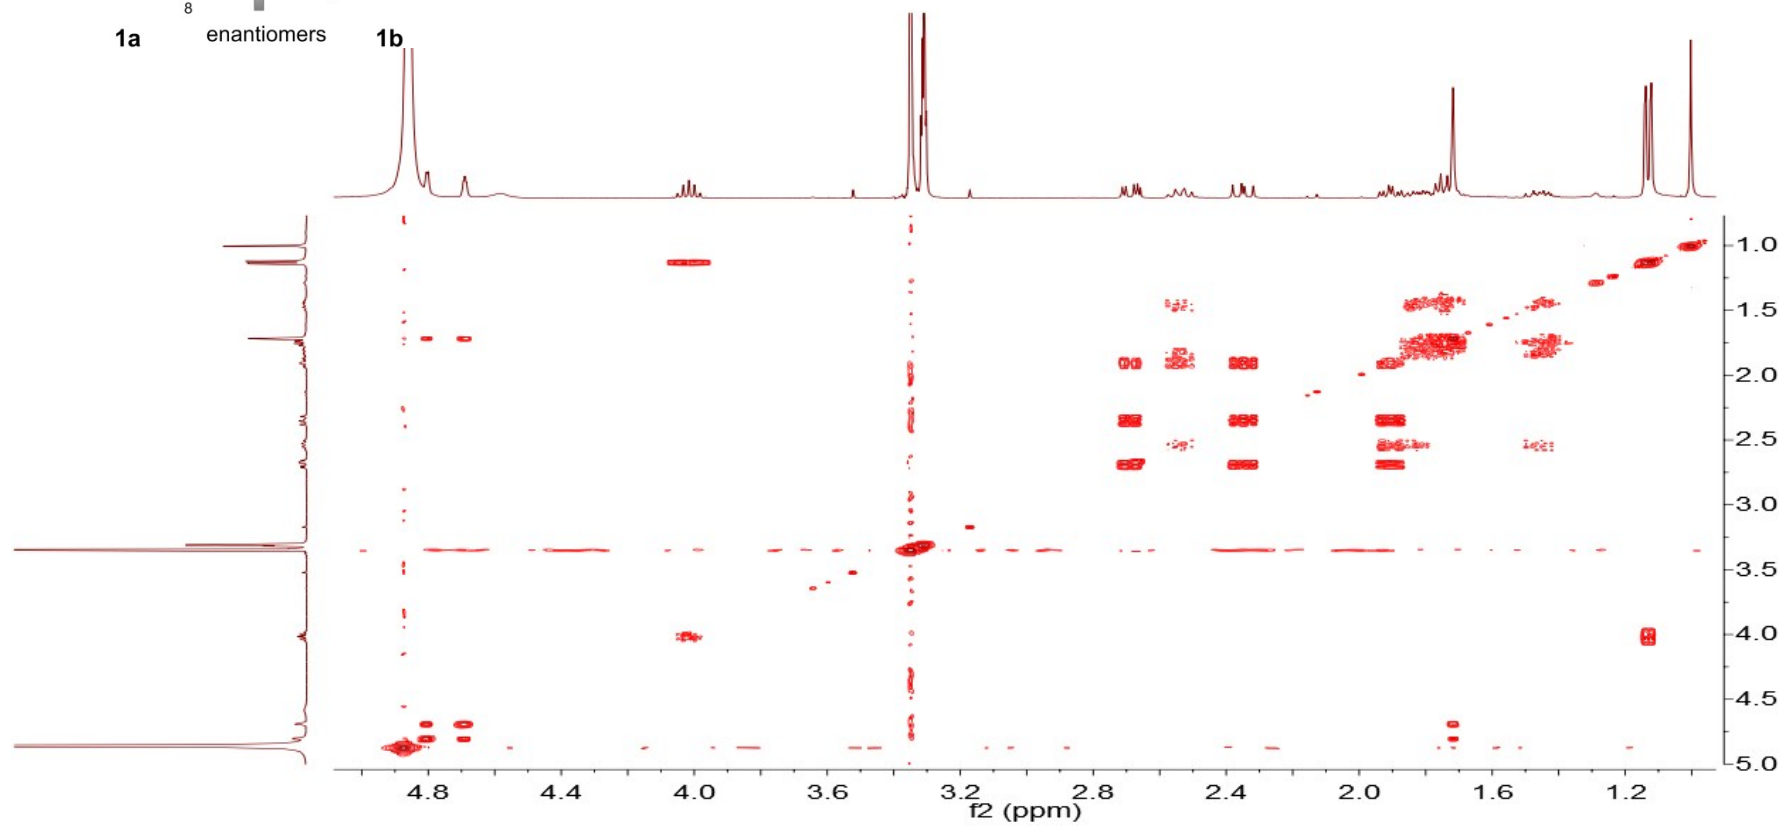

NOESY of compound **1** (in methanol-*d*<sub>4</sub>)

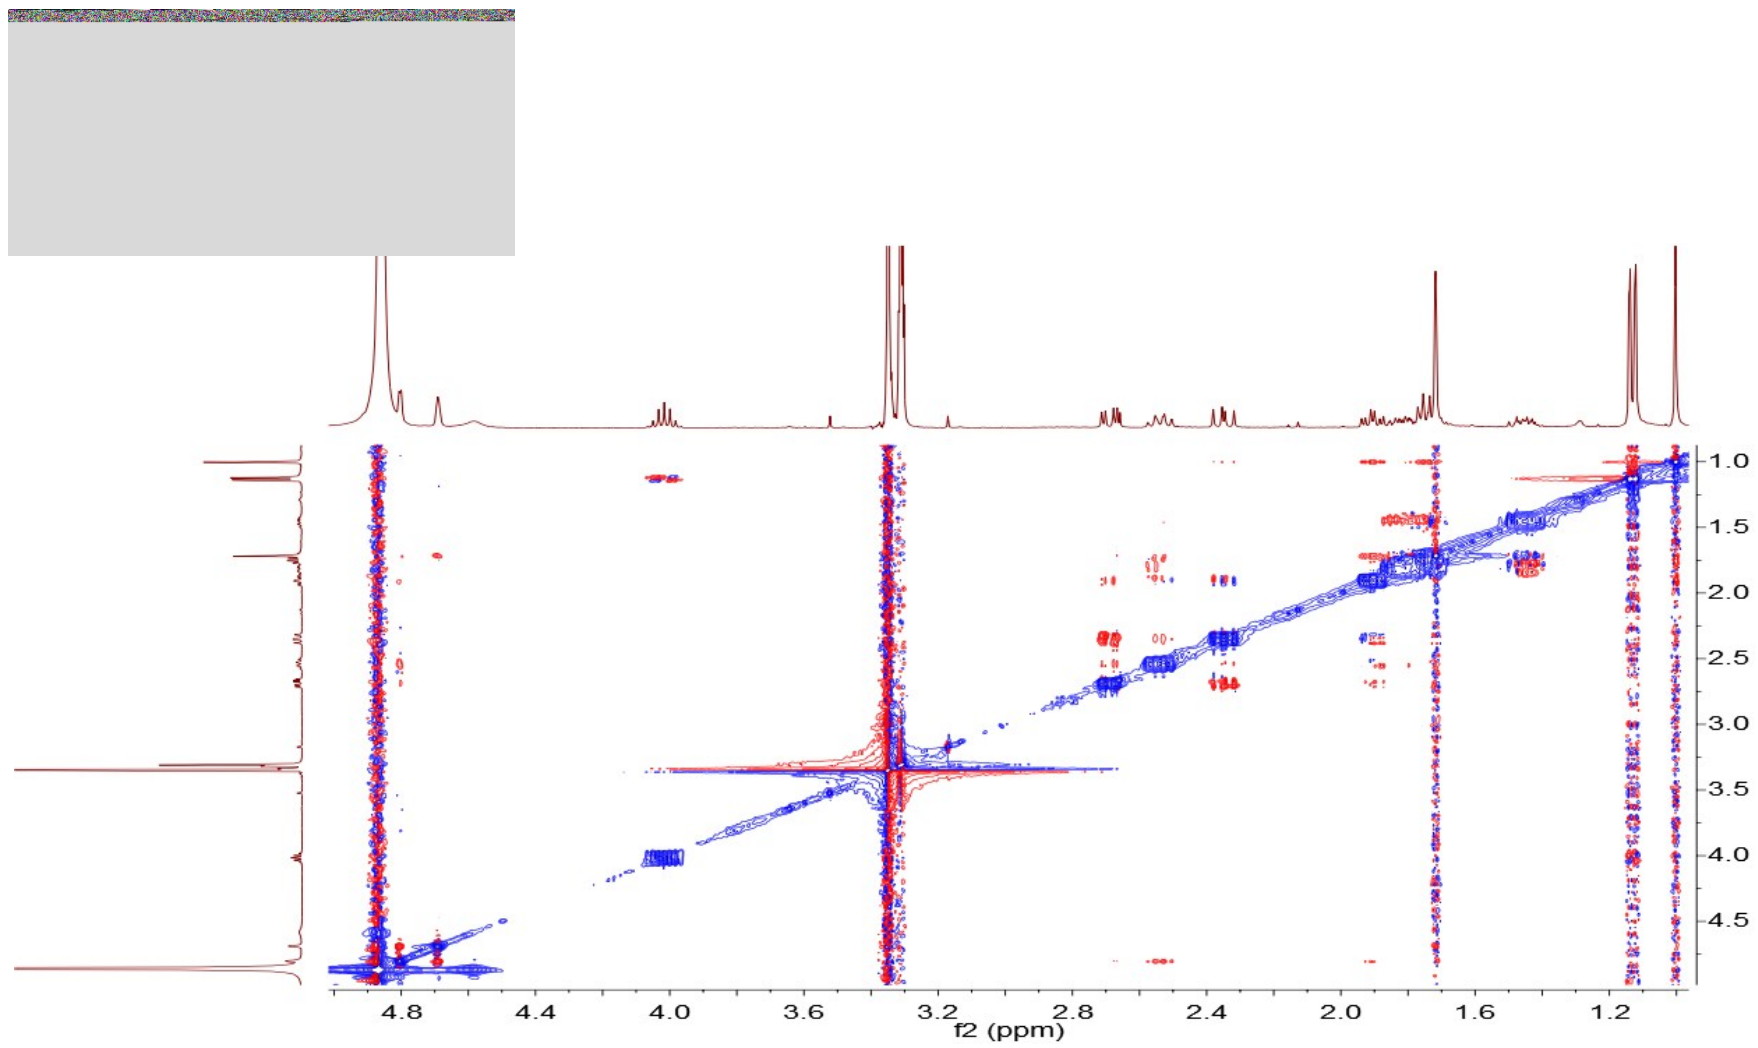

UV of compound **1** (in MeOH)

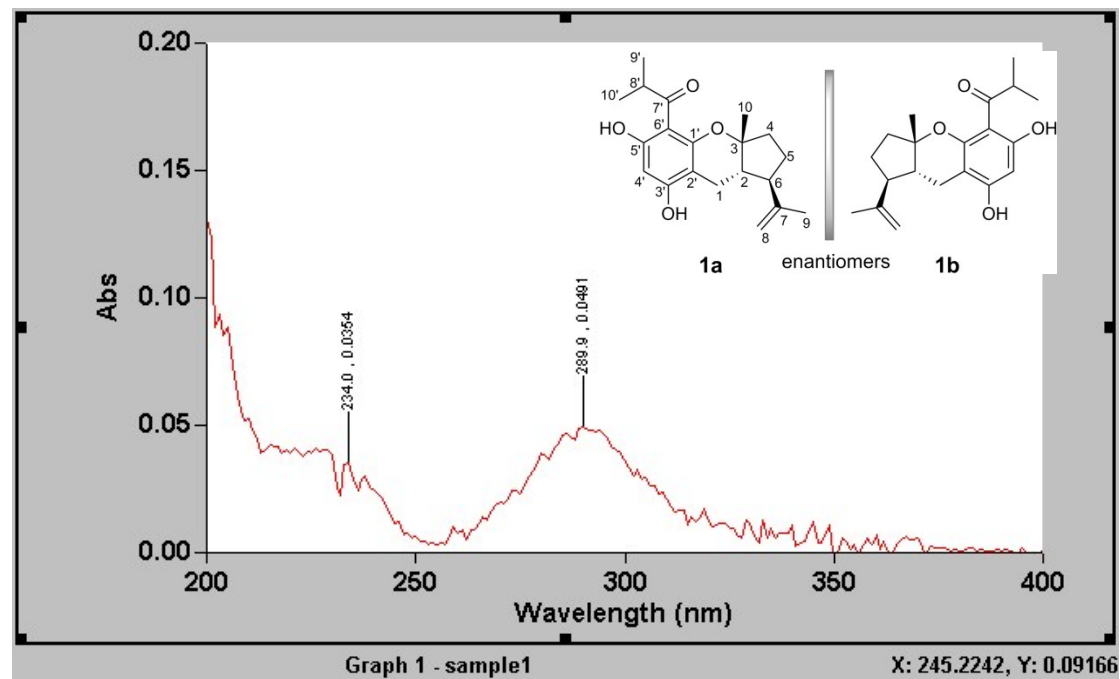

IR of compound **1** (KBr disc)

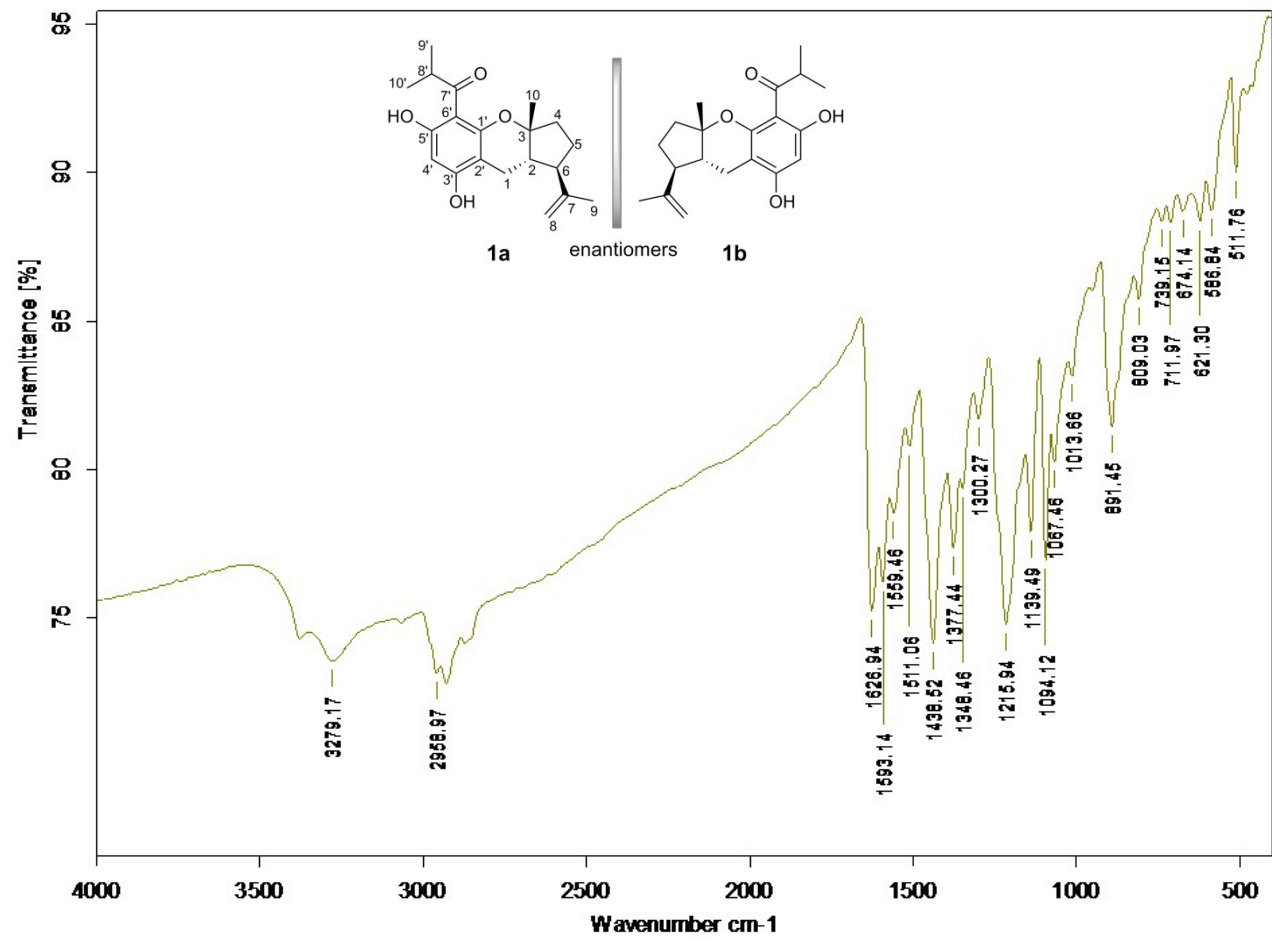



HRESIMS of compound 2

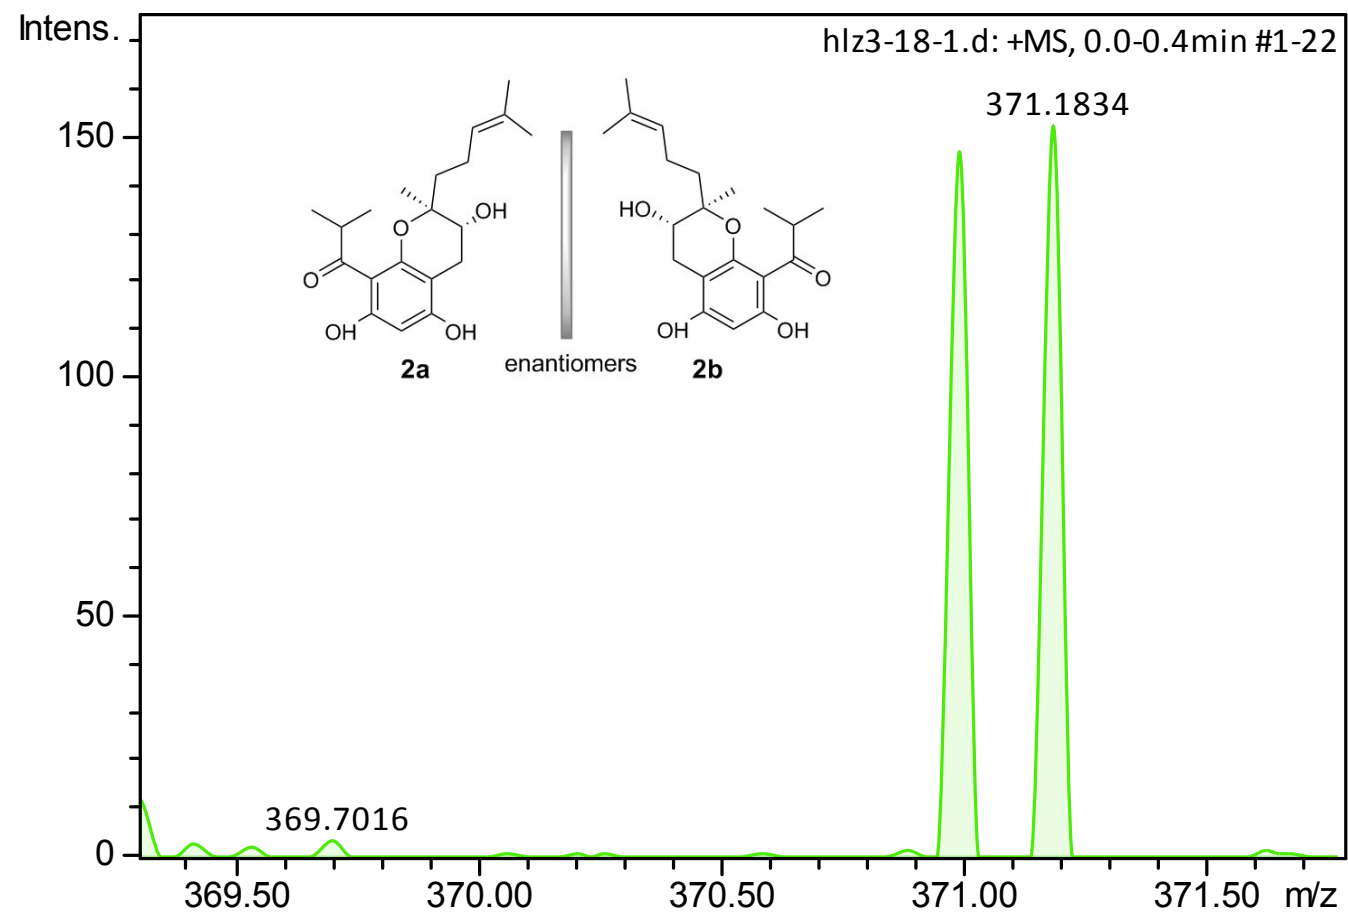

$^1\text{H}$  NMR of compound **2** (in methanol- $d_4$ )

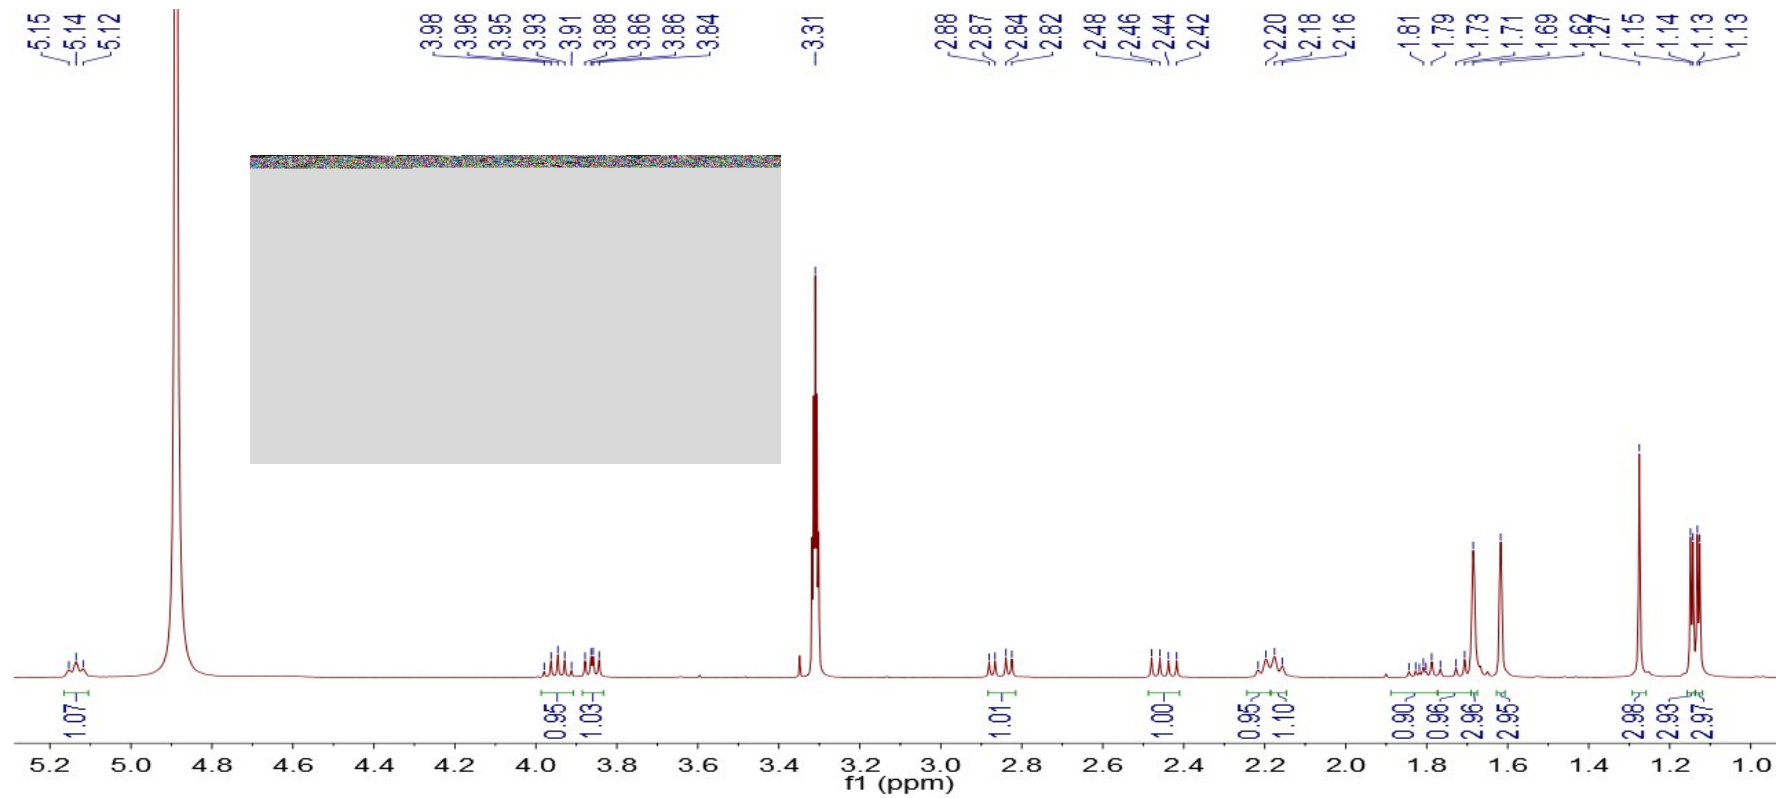

$^{13}\text{C}$  NMR of compound **2** (in methanol- $d_4$ )

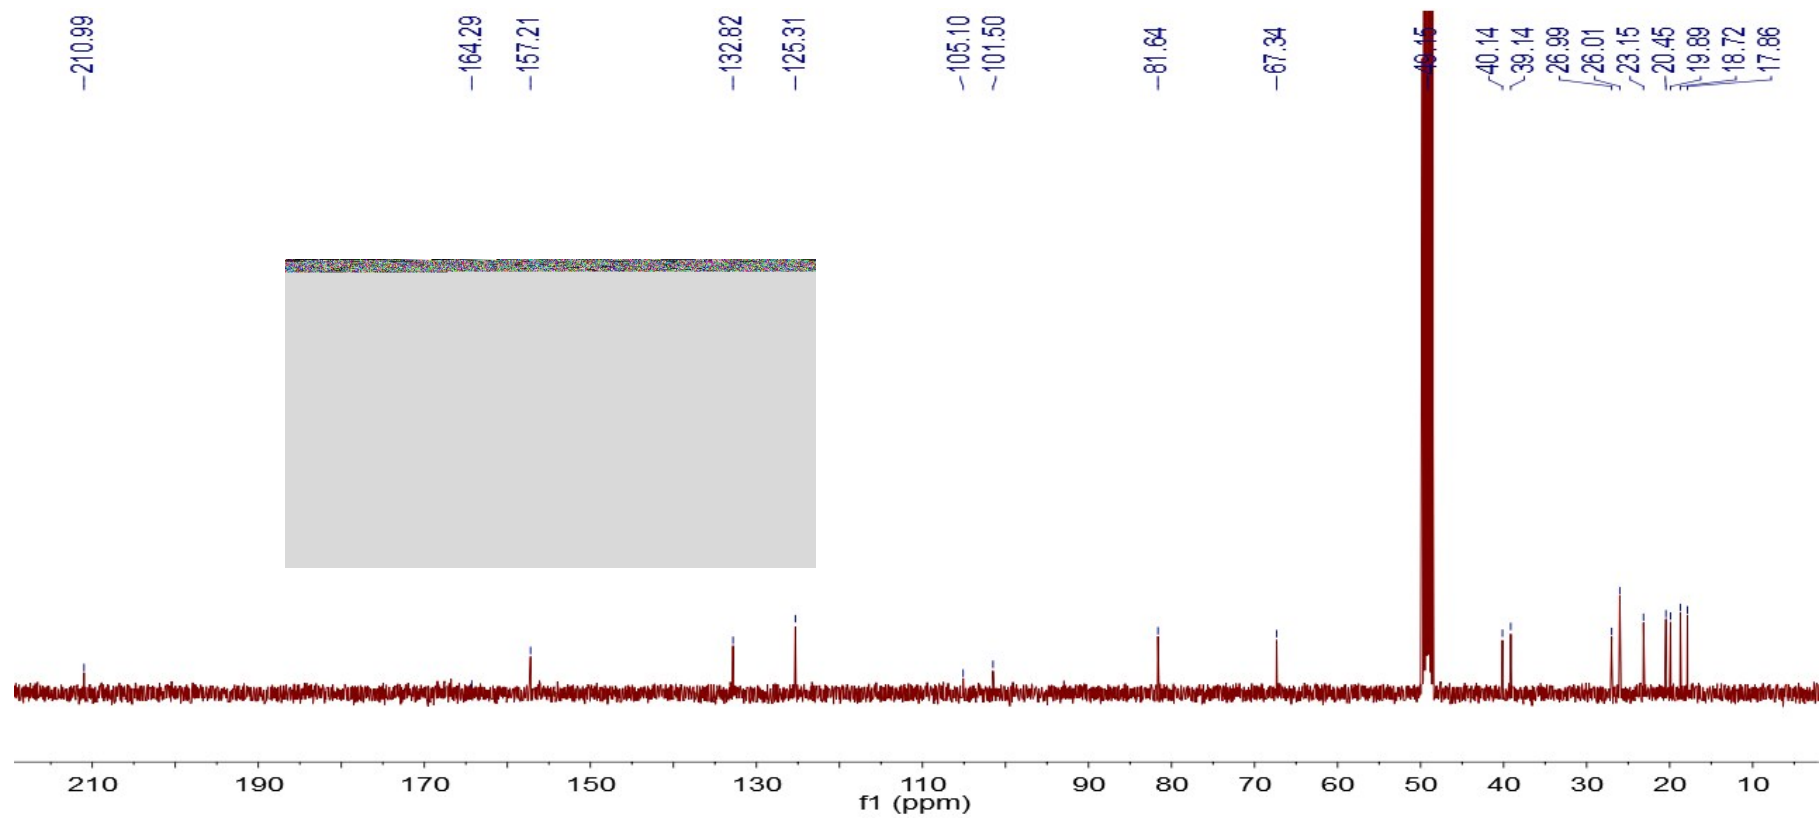

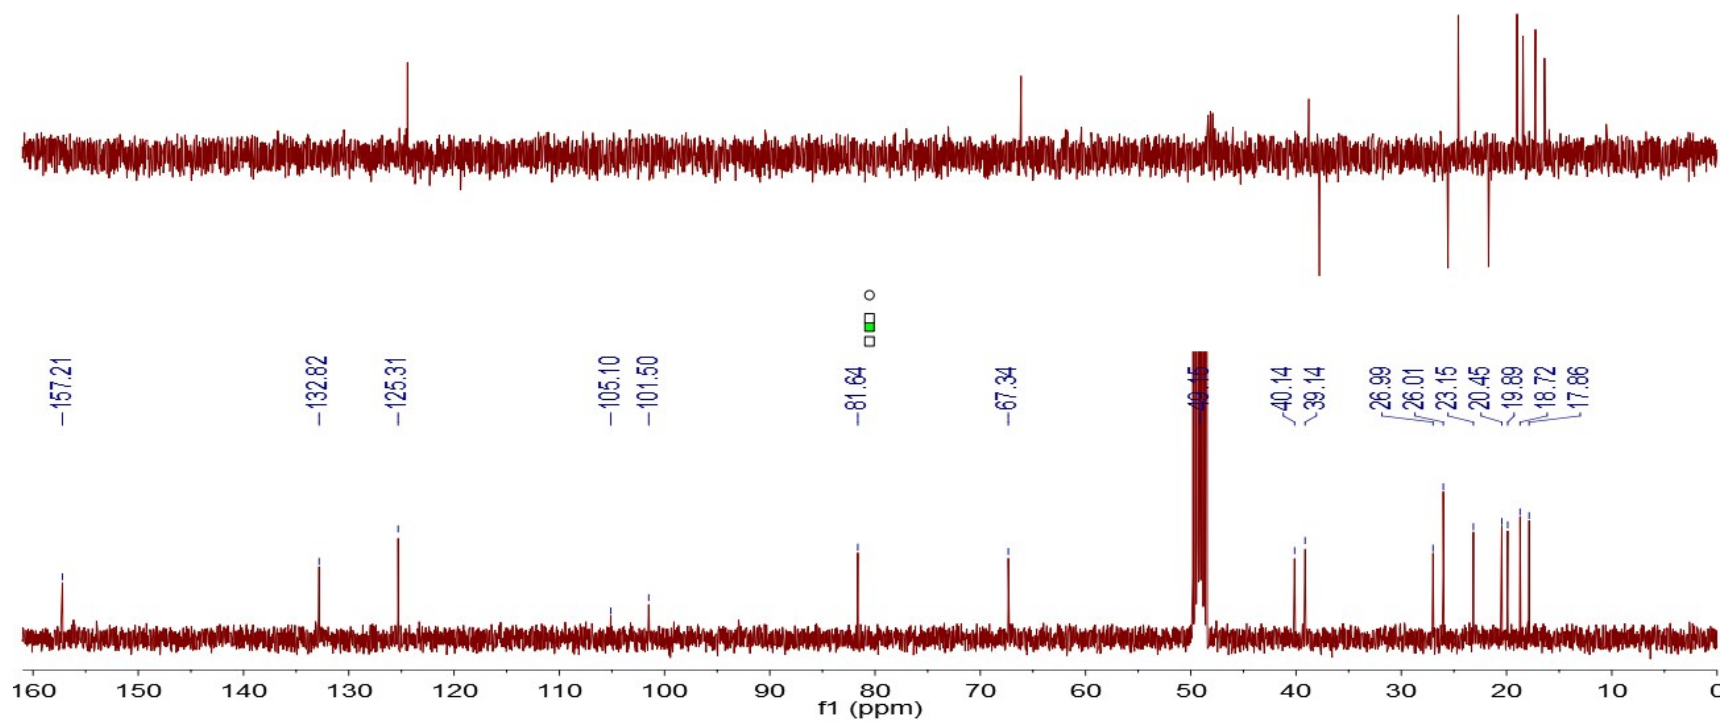

HSQC of compound 2 (in methanol- $d_4$ )

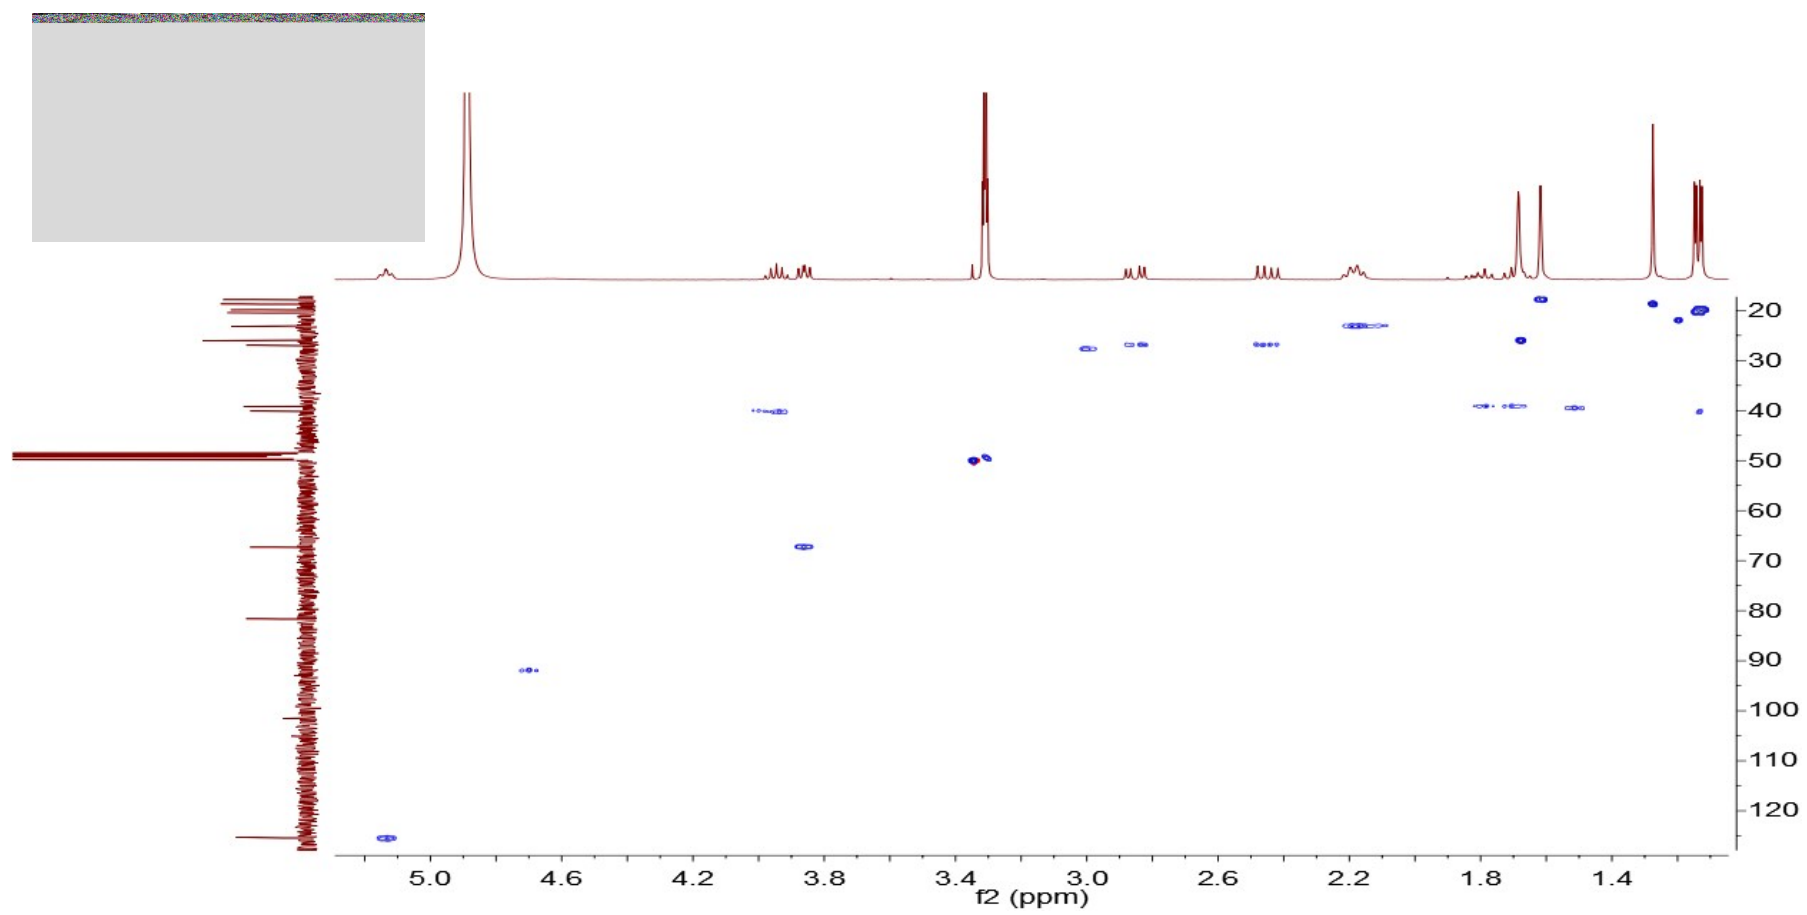

HMBC of compound 2 (in methanol- $d_4$ )

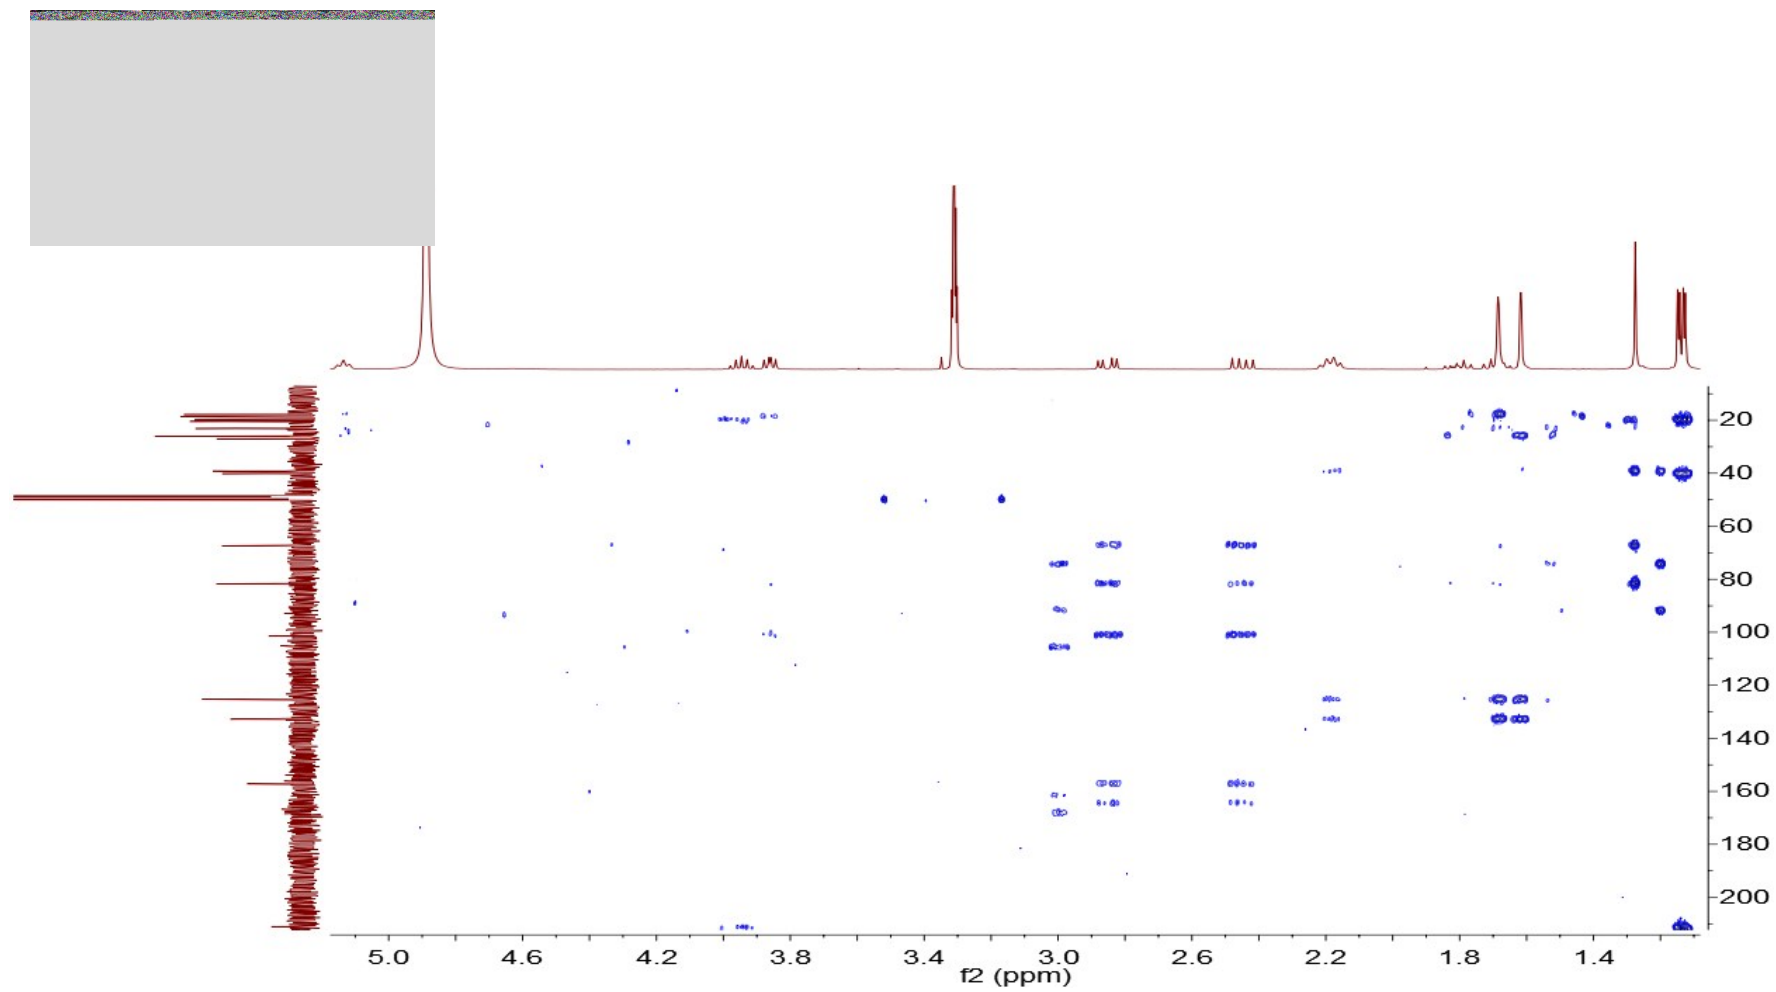

$^1\text{H}$ - $^1\text{H}$  COSY of compound 2 (in methanol- $d_4$ )

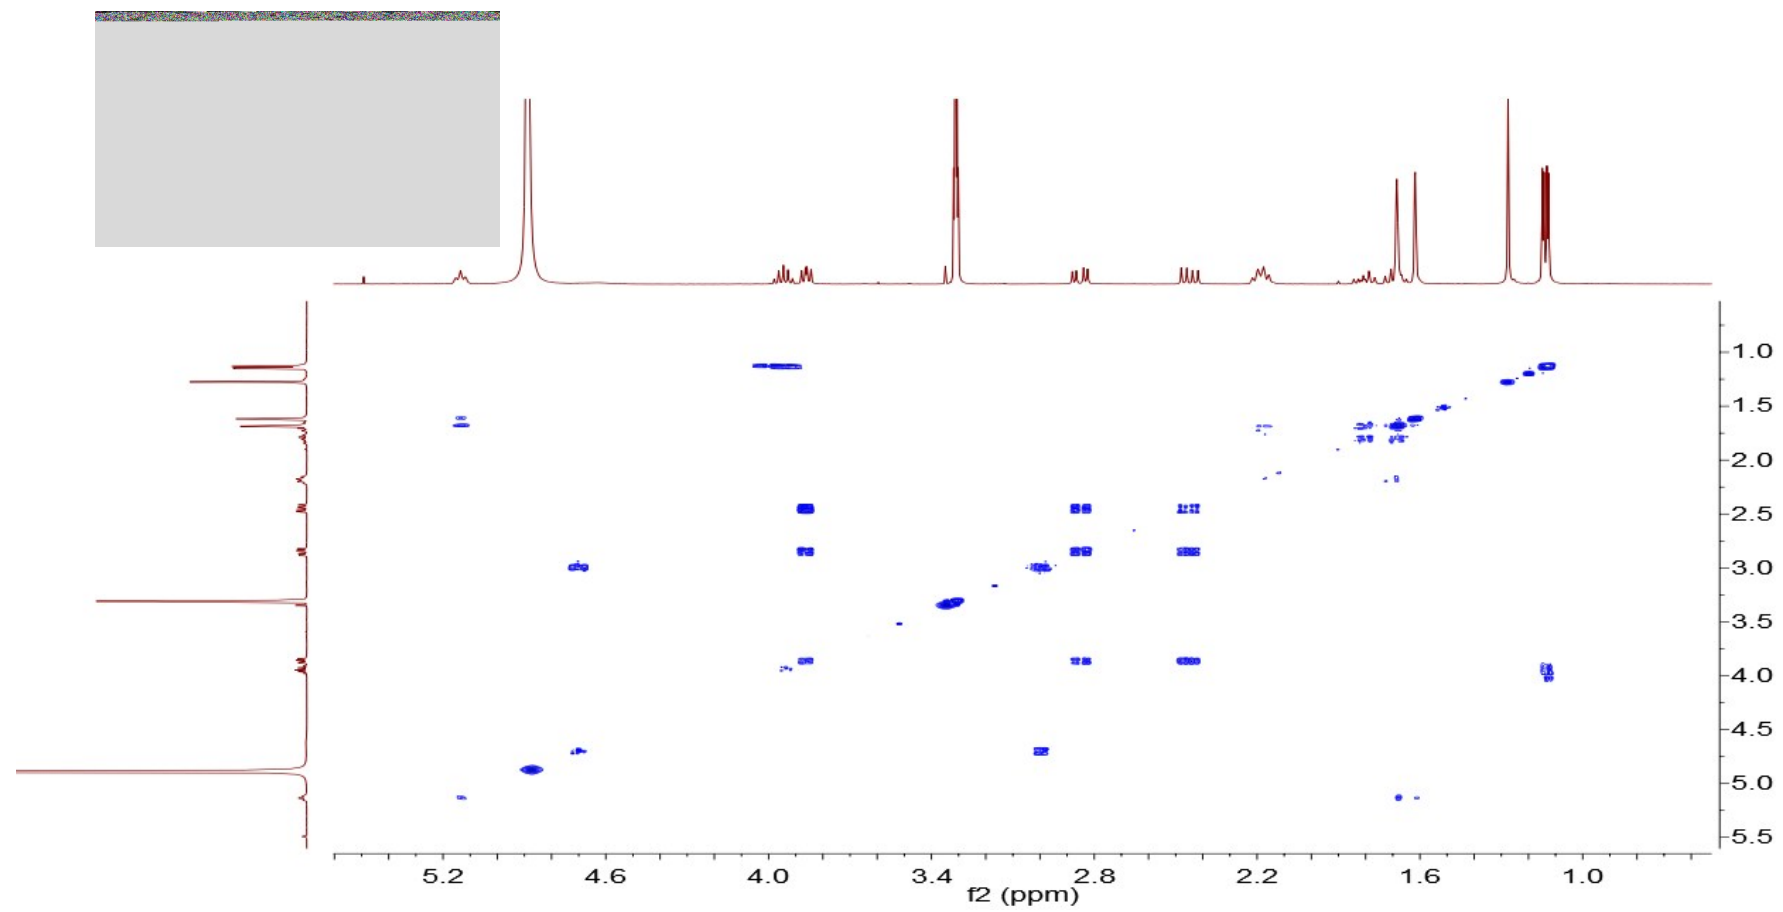

NOESY of compound 2 (in methanol-*d*<sub>4</sub>)

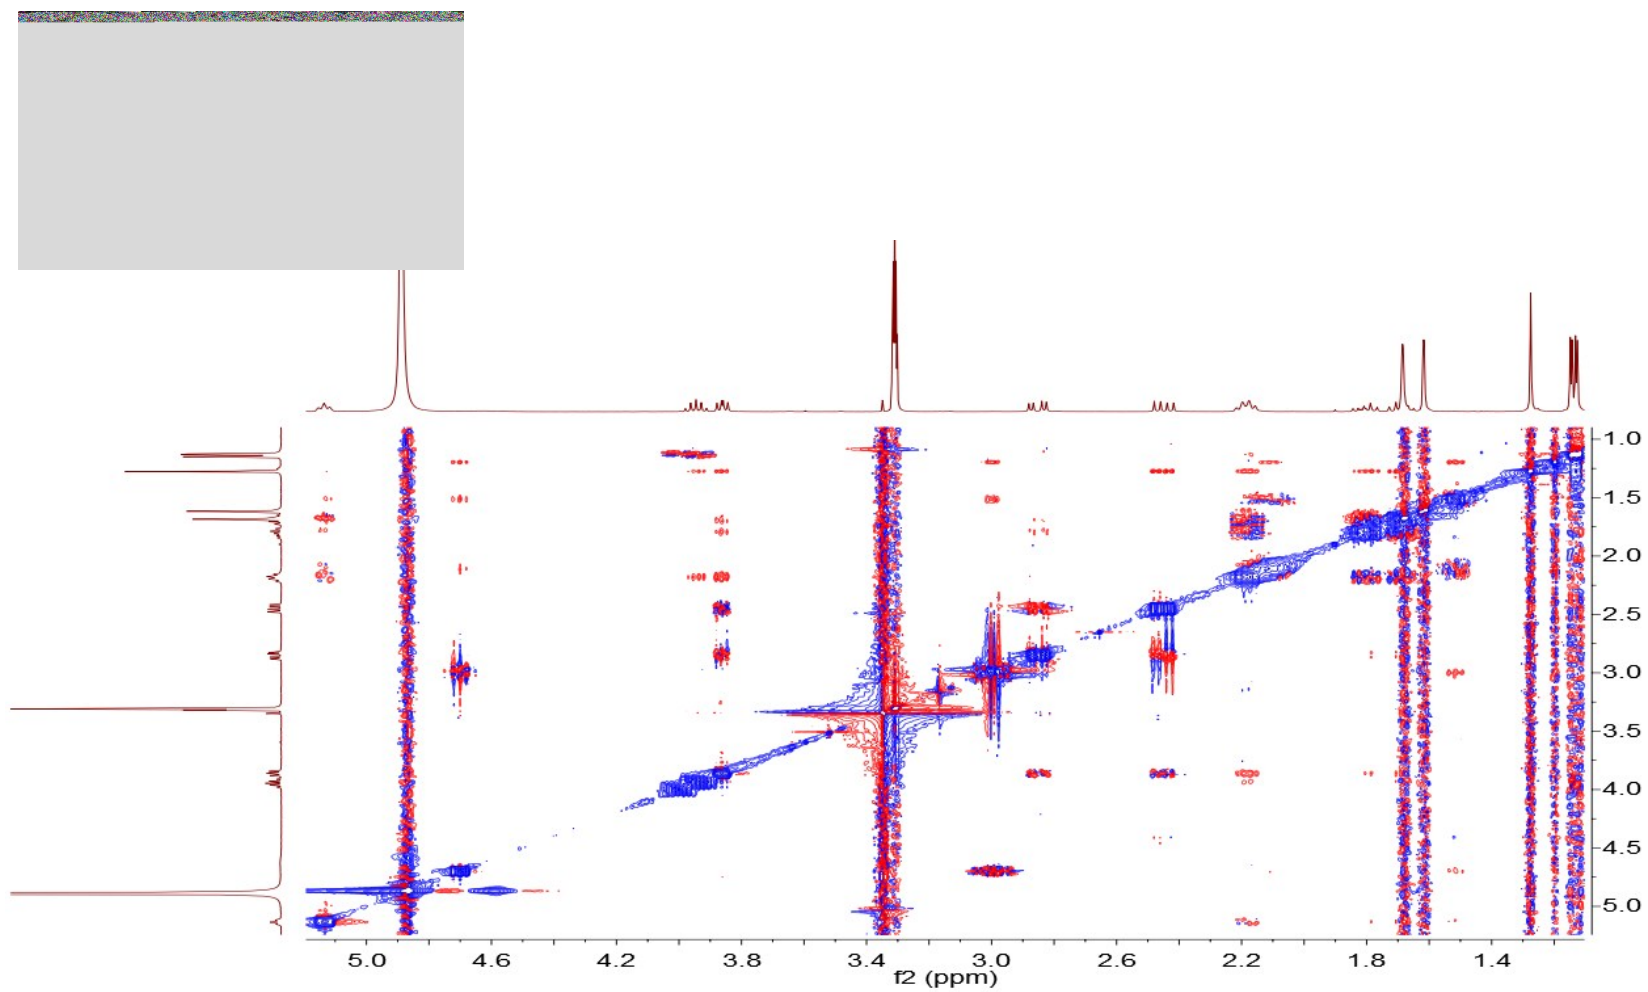



UV of compound 2(in MeOH)

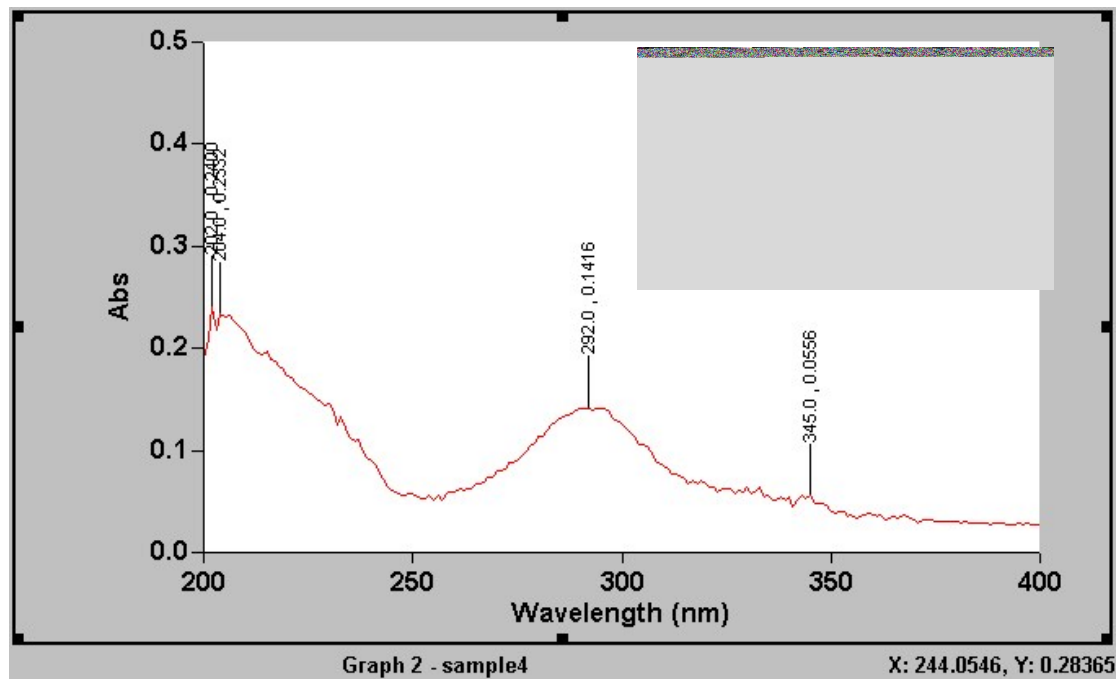

IR of compound 2(KBr disc)

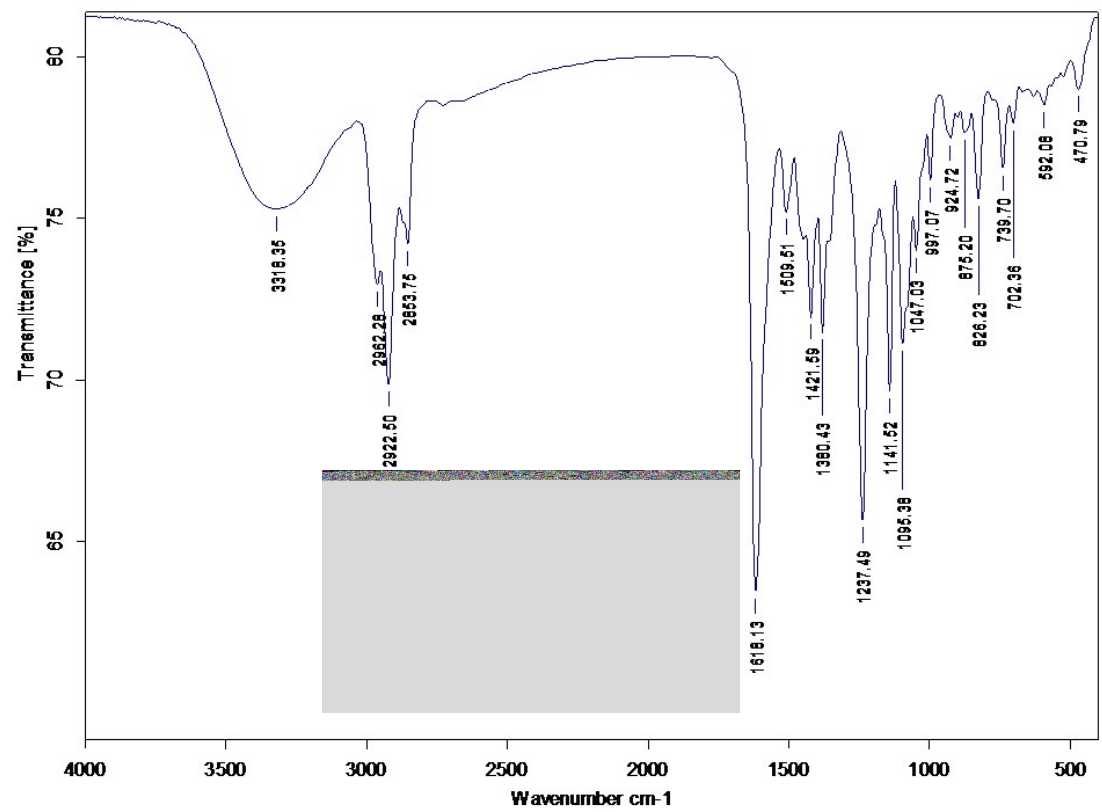

HRESIMS of compound 3

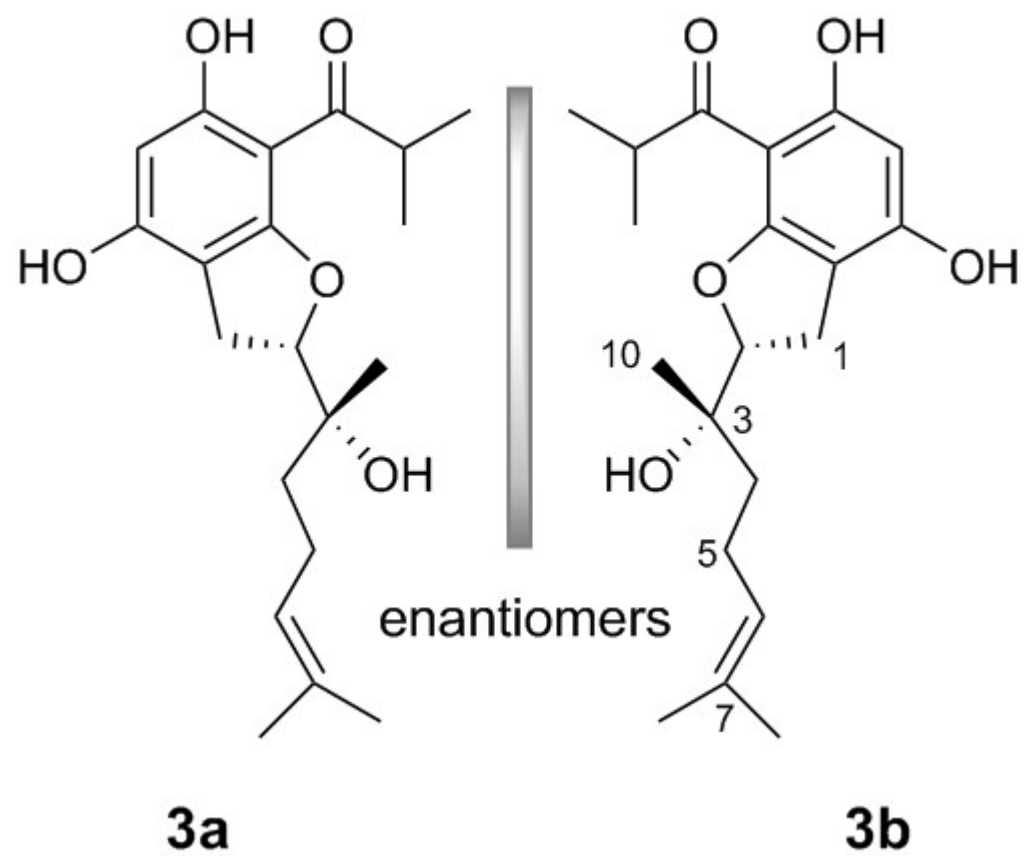

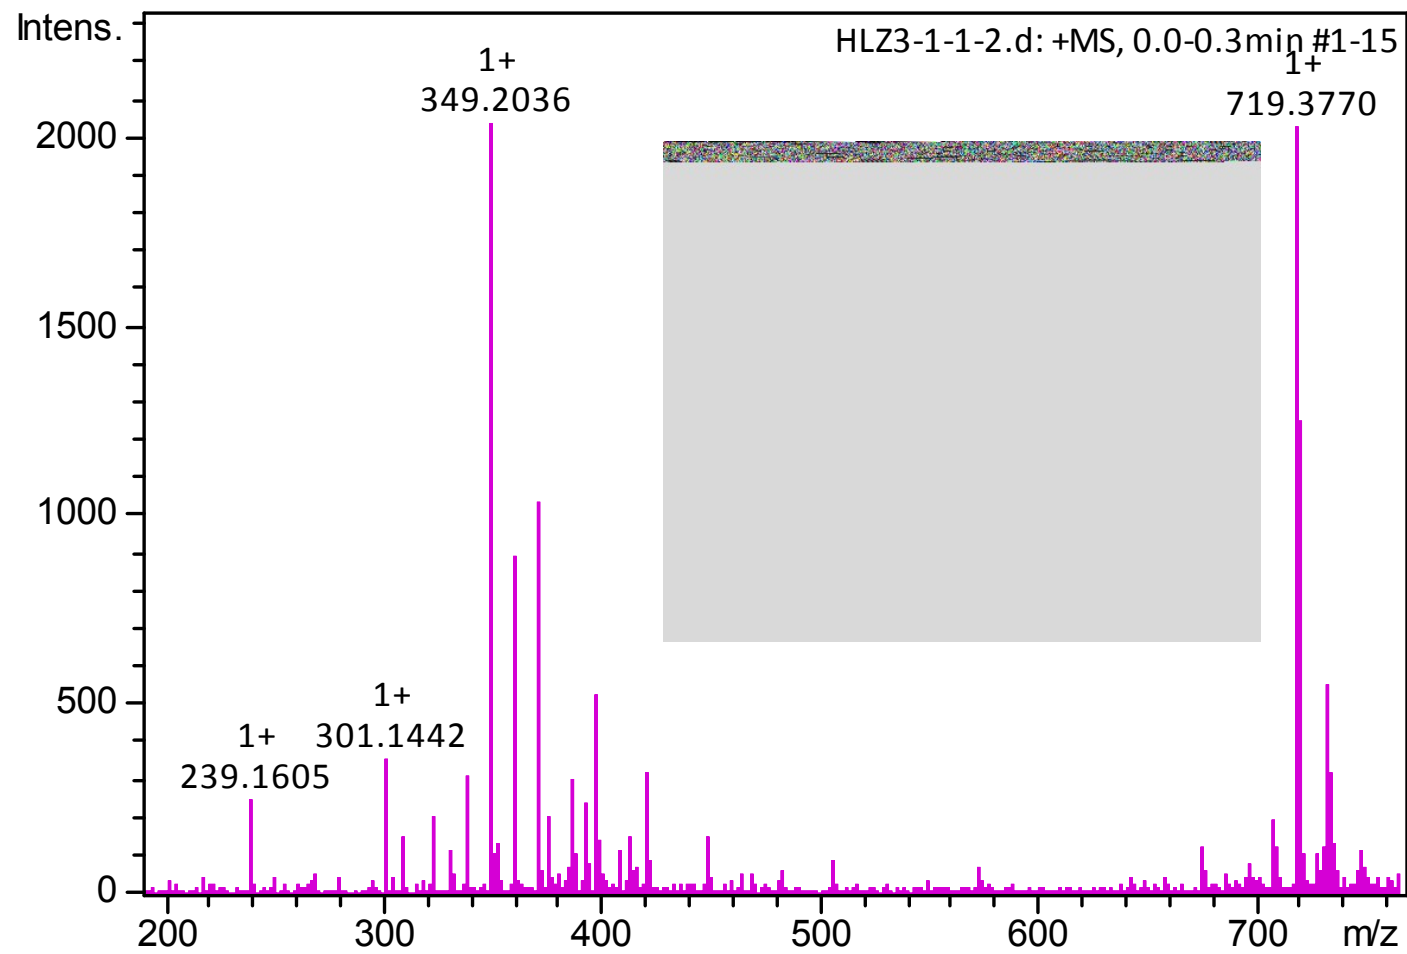

$^1\text{H}$  NMR of compound **3** (in methanol- $d_4$ )

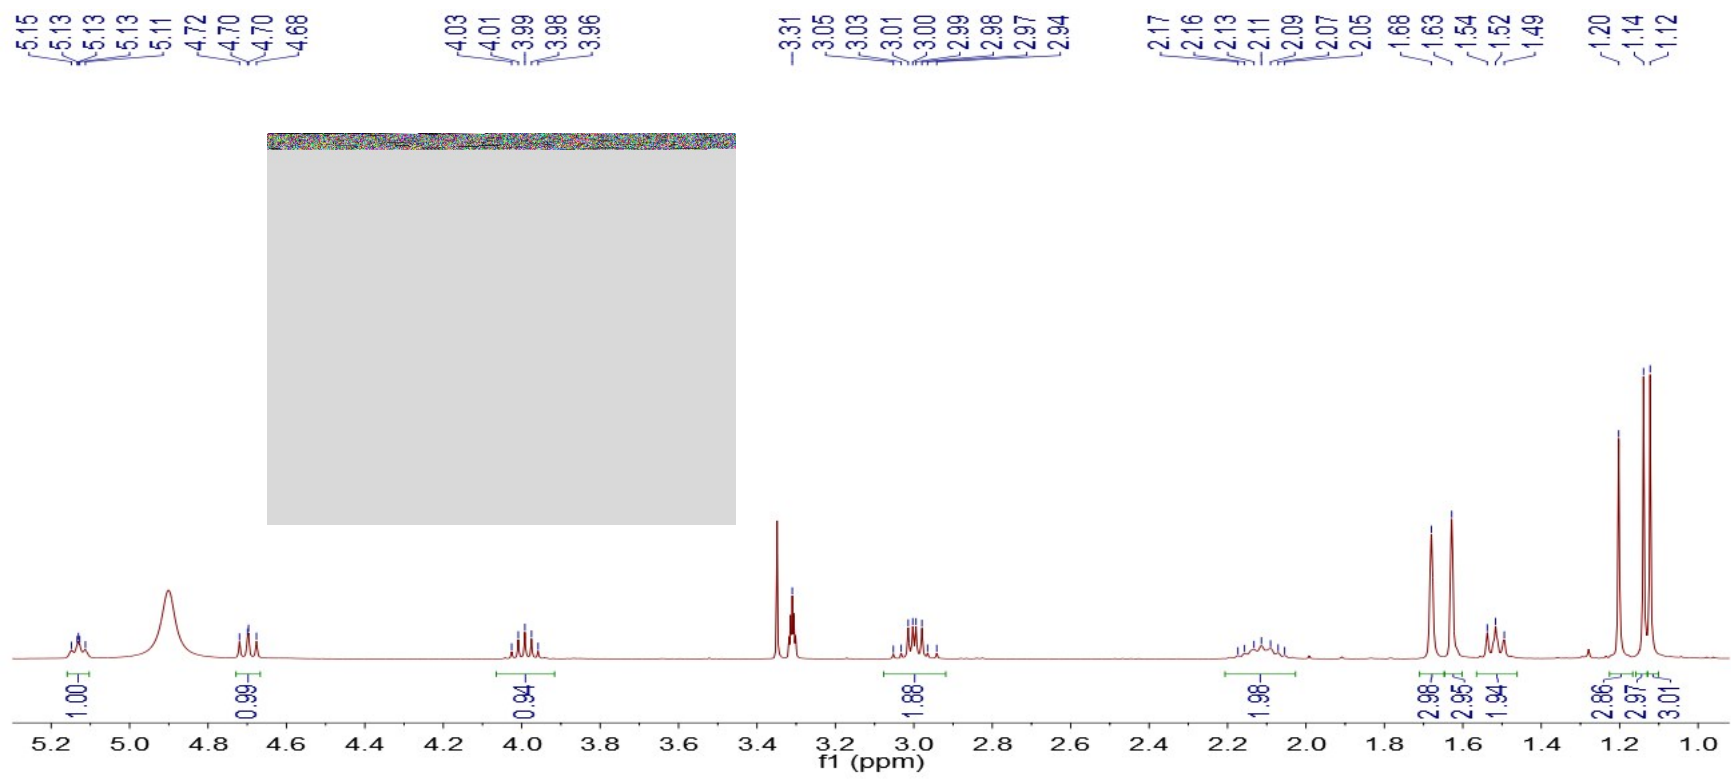

$^{13}\text{C}$  NMR of compound **3** (in methanol- $d_4$ )

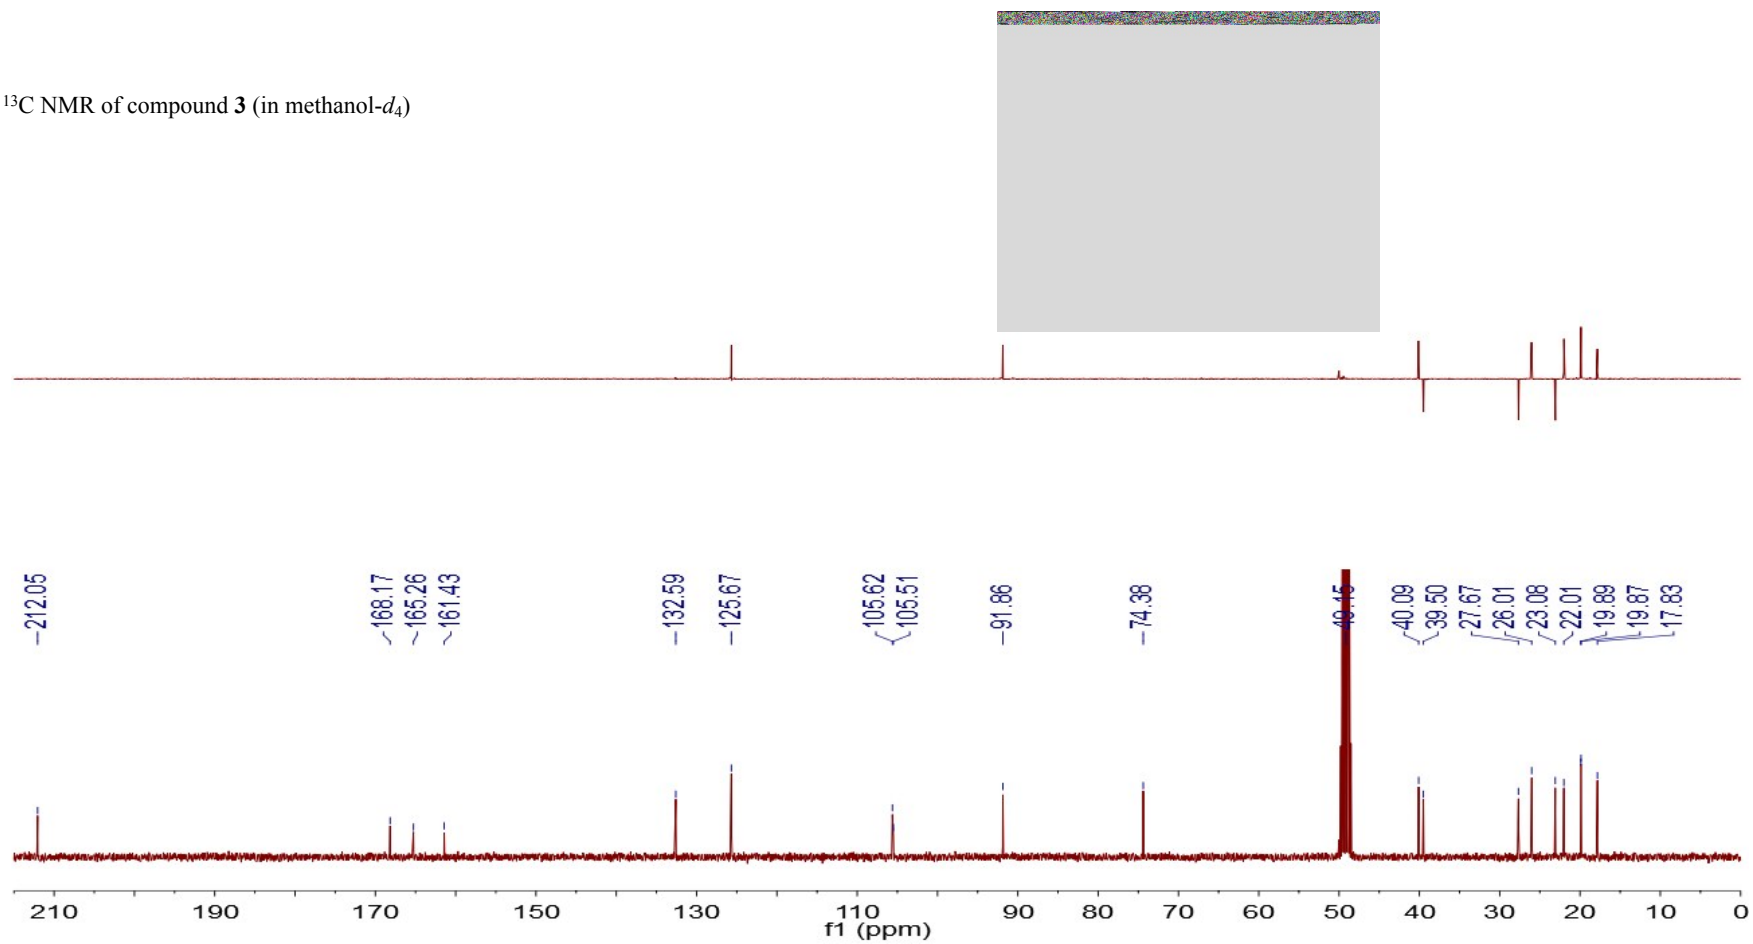

HSQC of compound 3 (in methanol-*d*<sub>4</sub>)

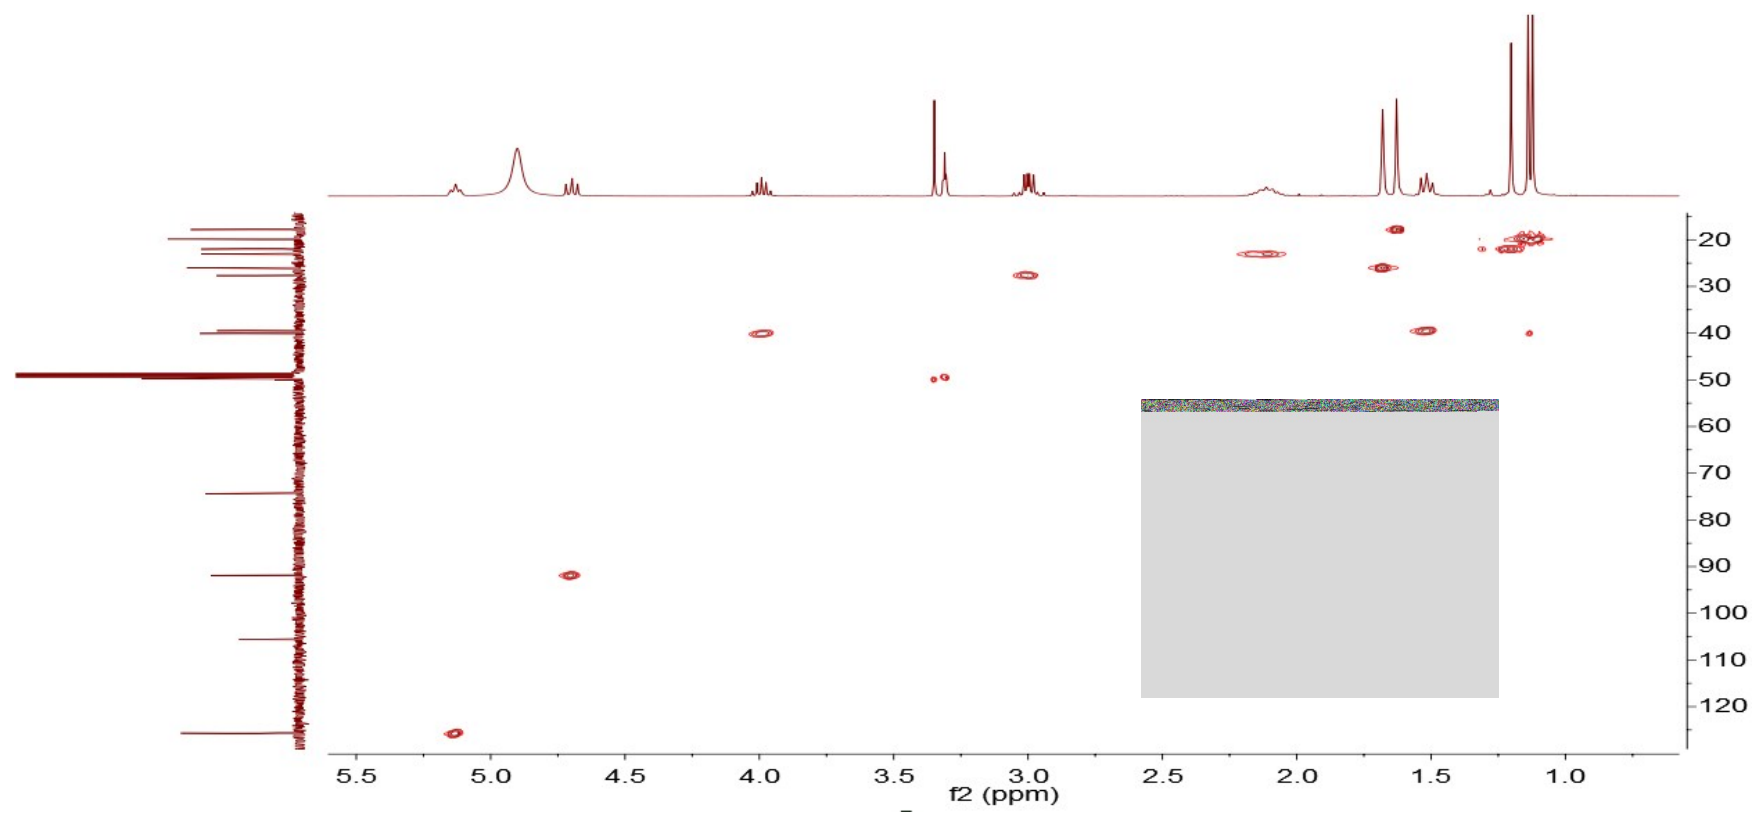

HMBC of compound 3 (in methanol- $d_4$ )

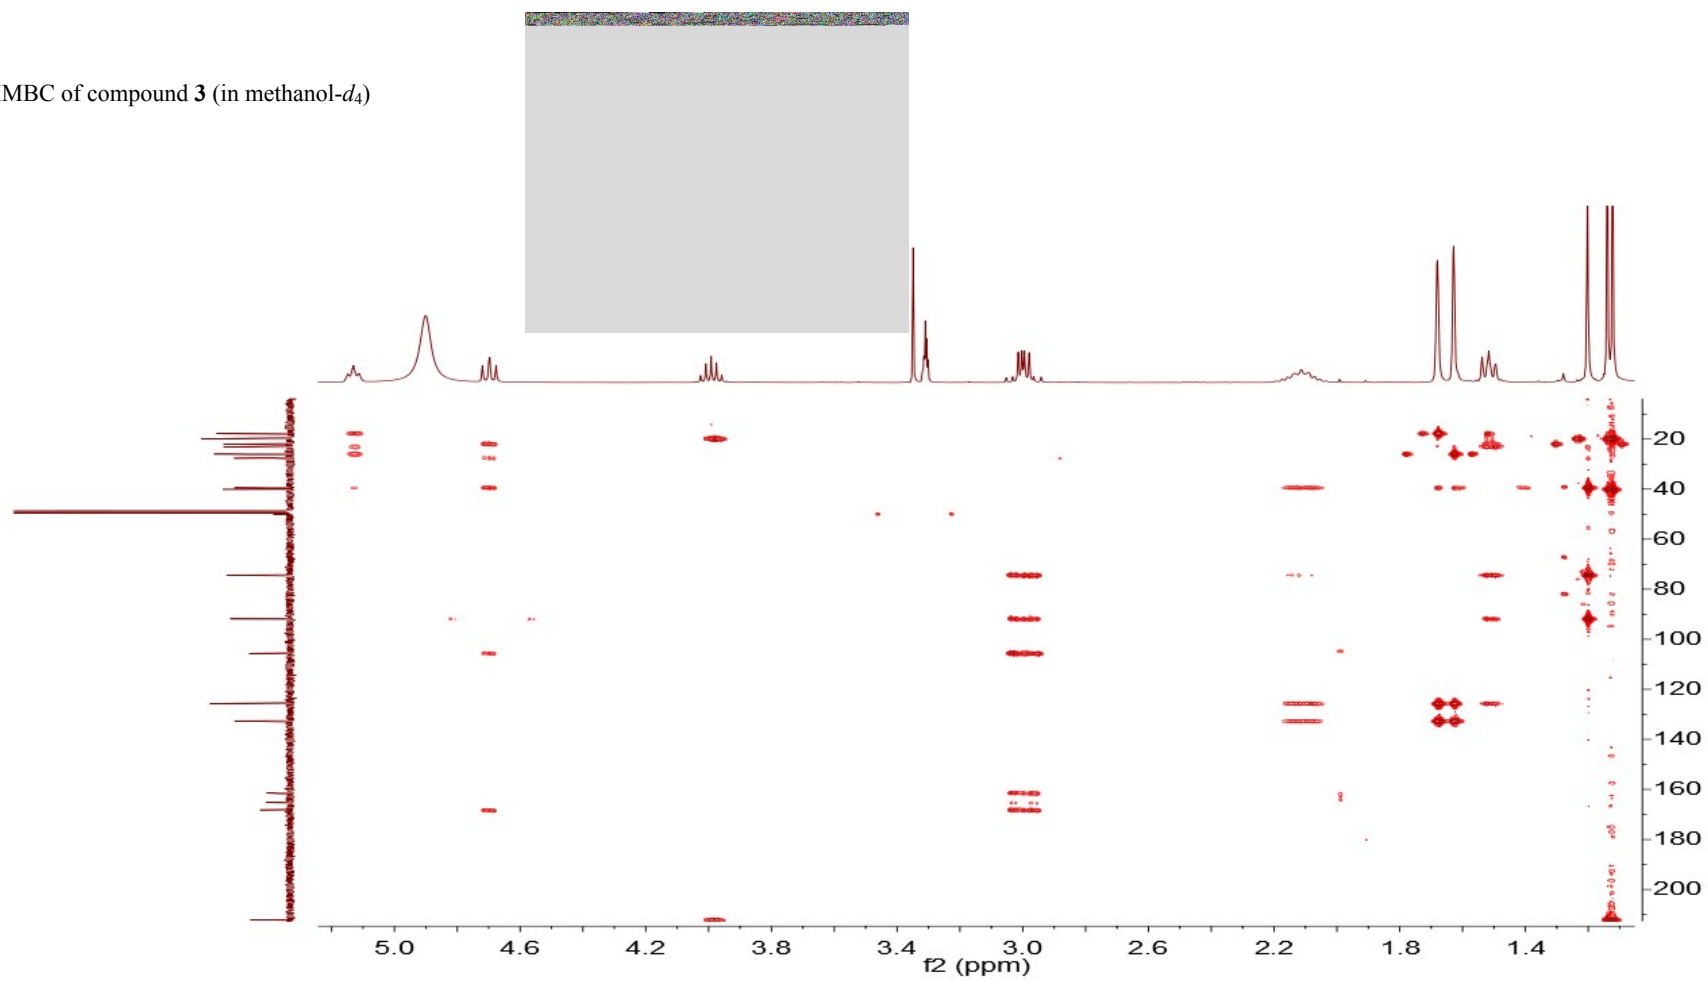



$^1\text{H}$ - $^1\text{H}$  COSY of compound **3** (in methanol- $d_4$ )

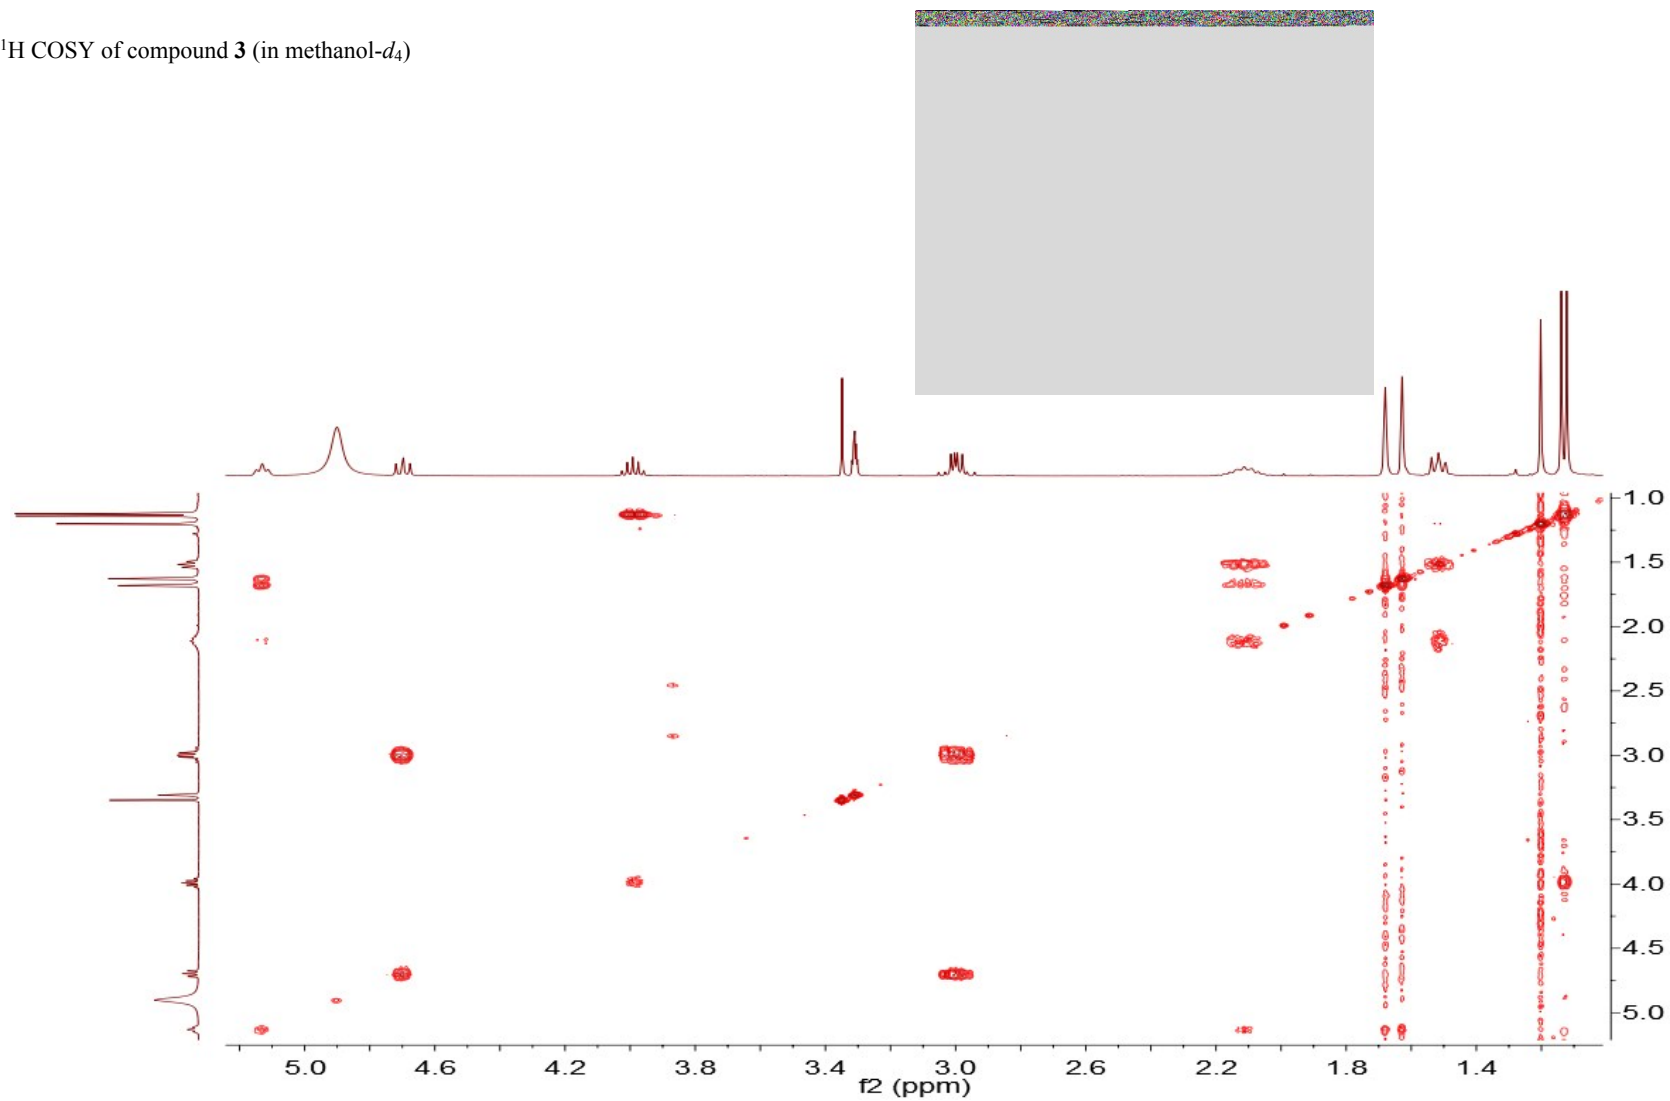

NOESY of compound 3 (in methanol-*d*<sub>4</sub>)

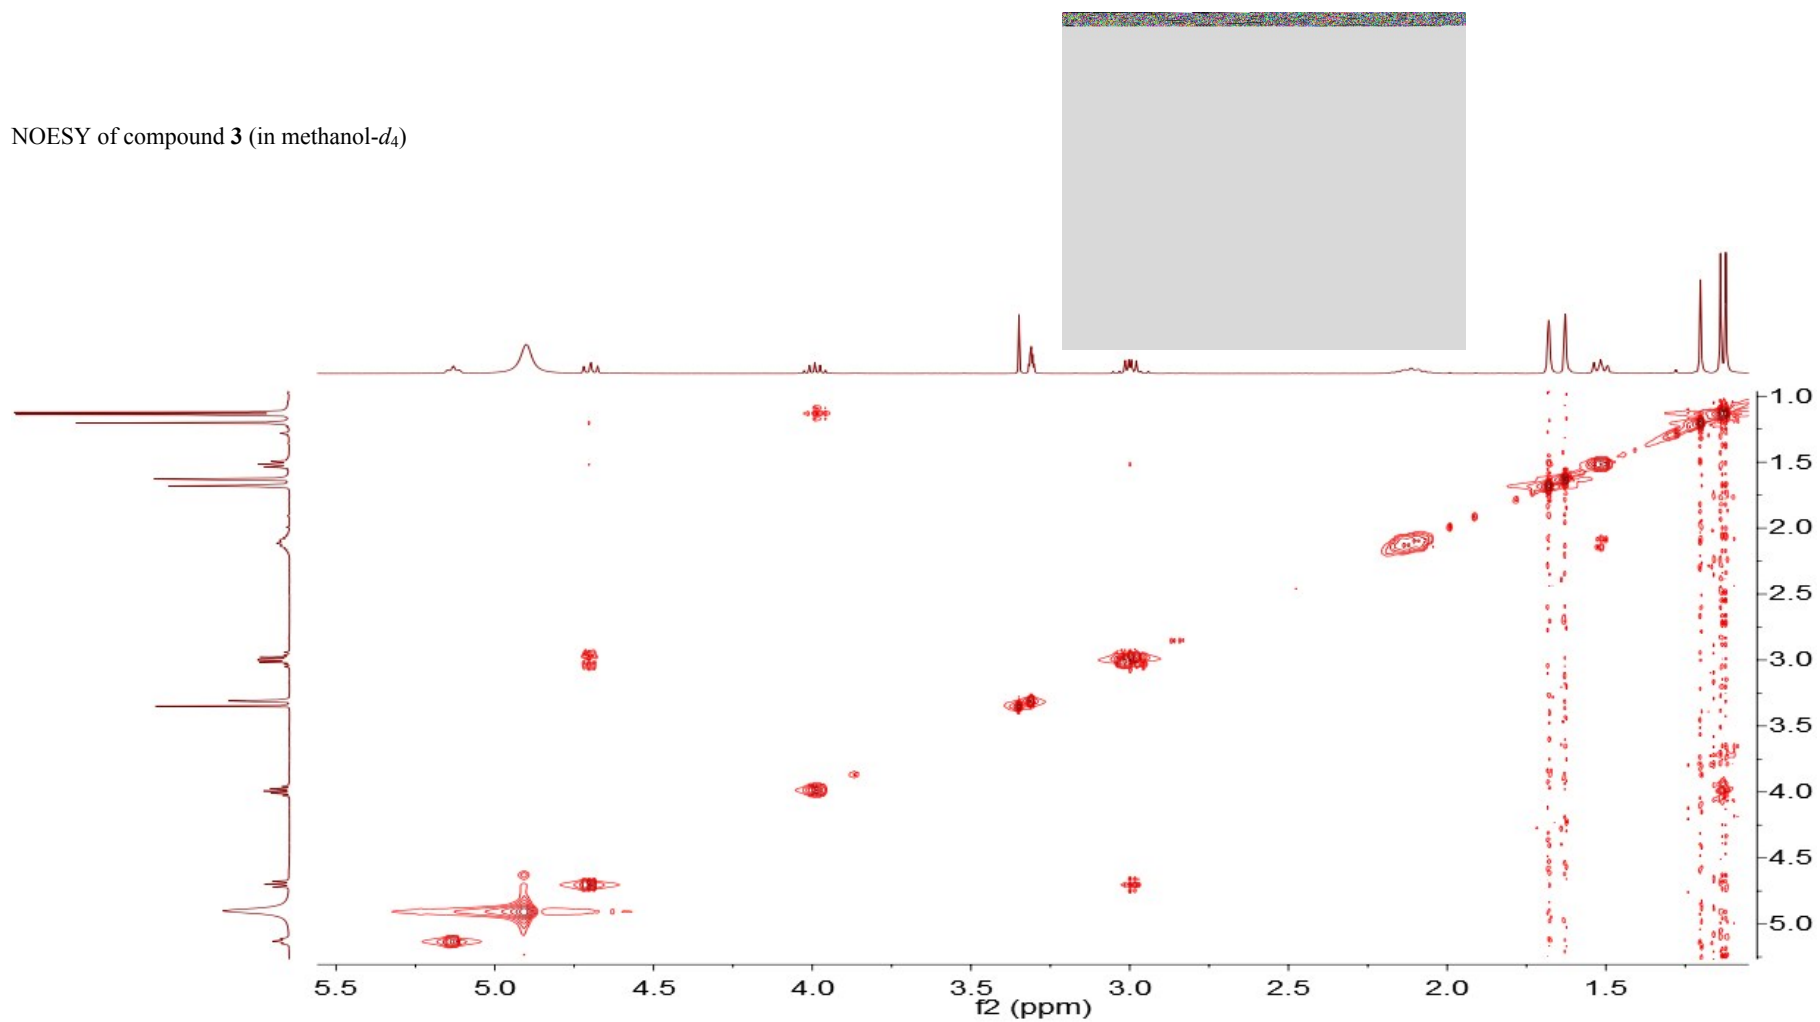

UV of compound 3(in MeOH)

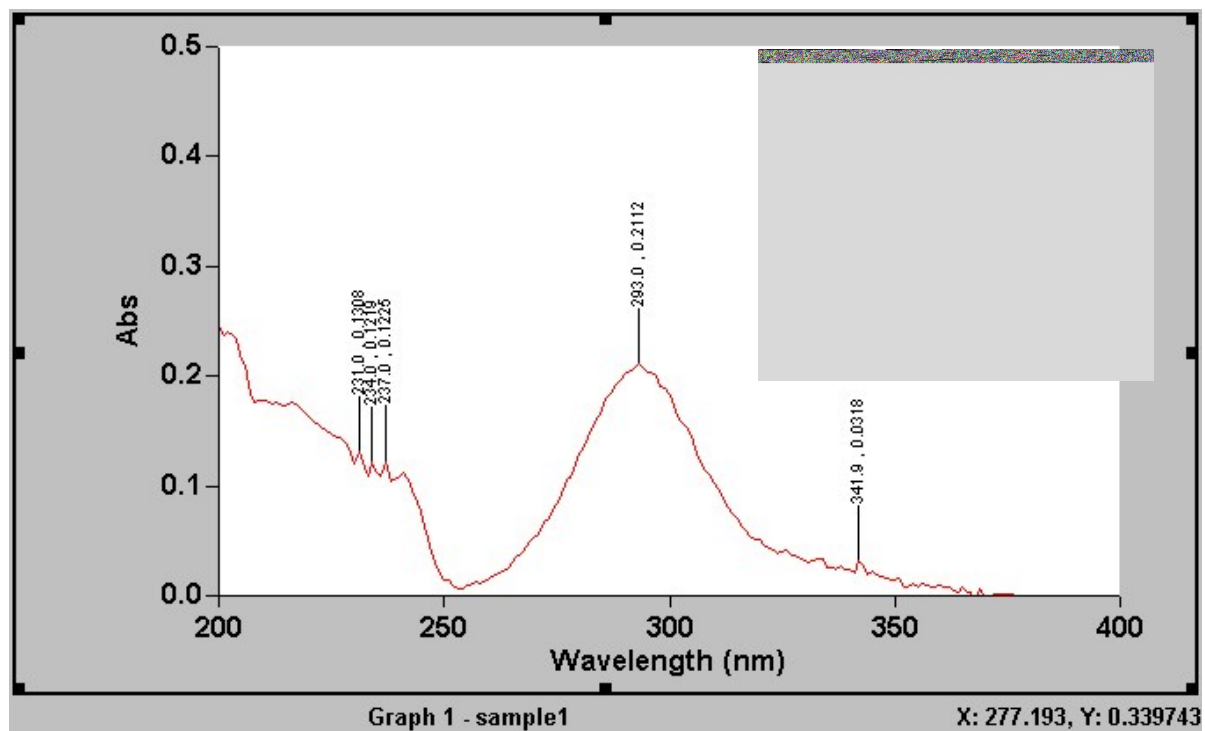

IR of compound 3 (KBr disc)

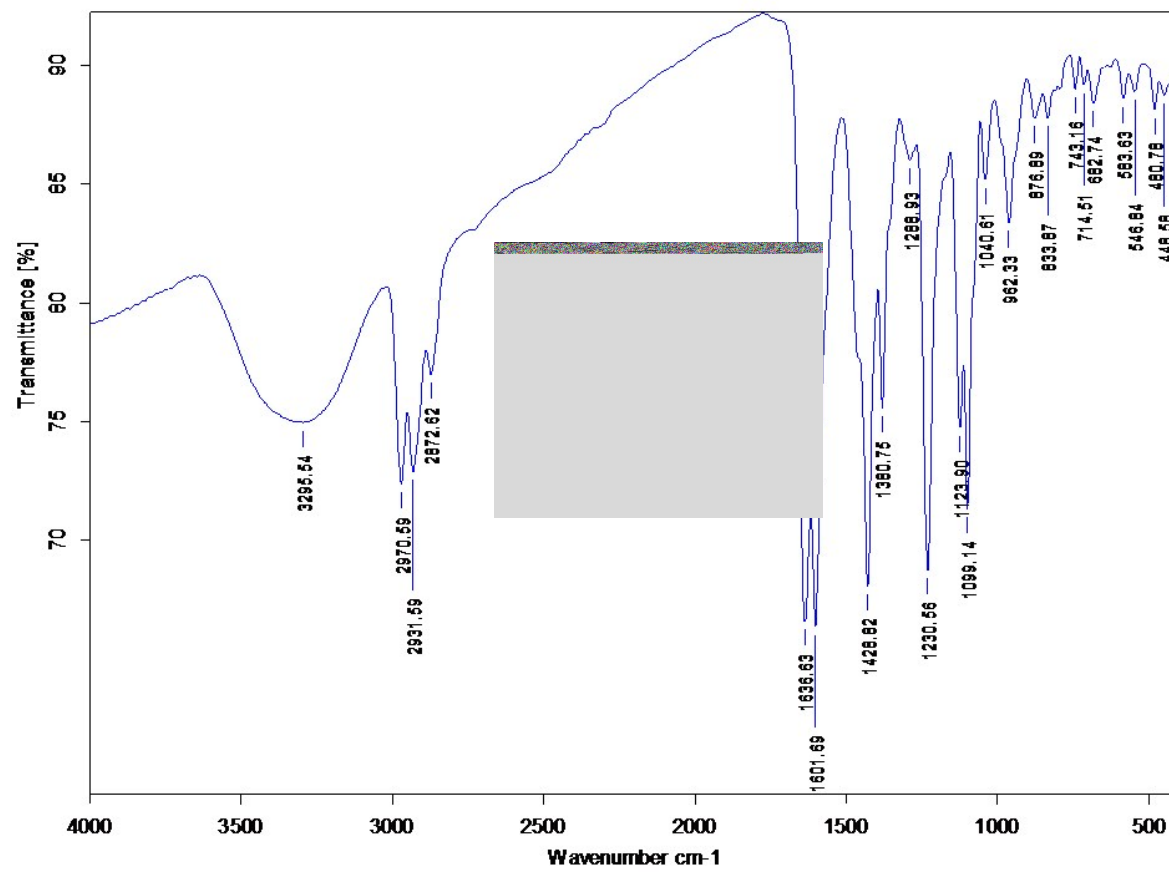

HRESIMS of compound 4

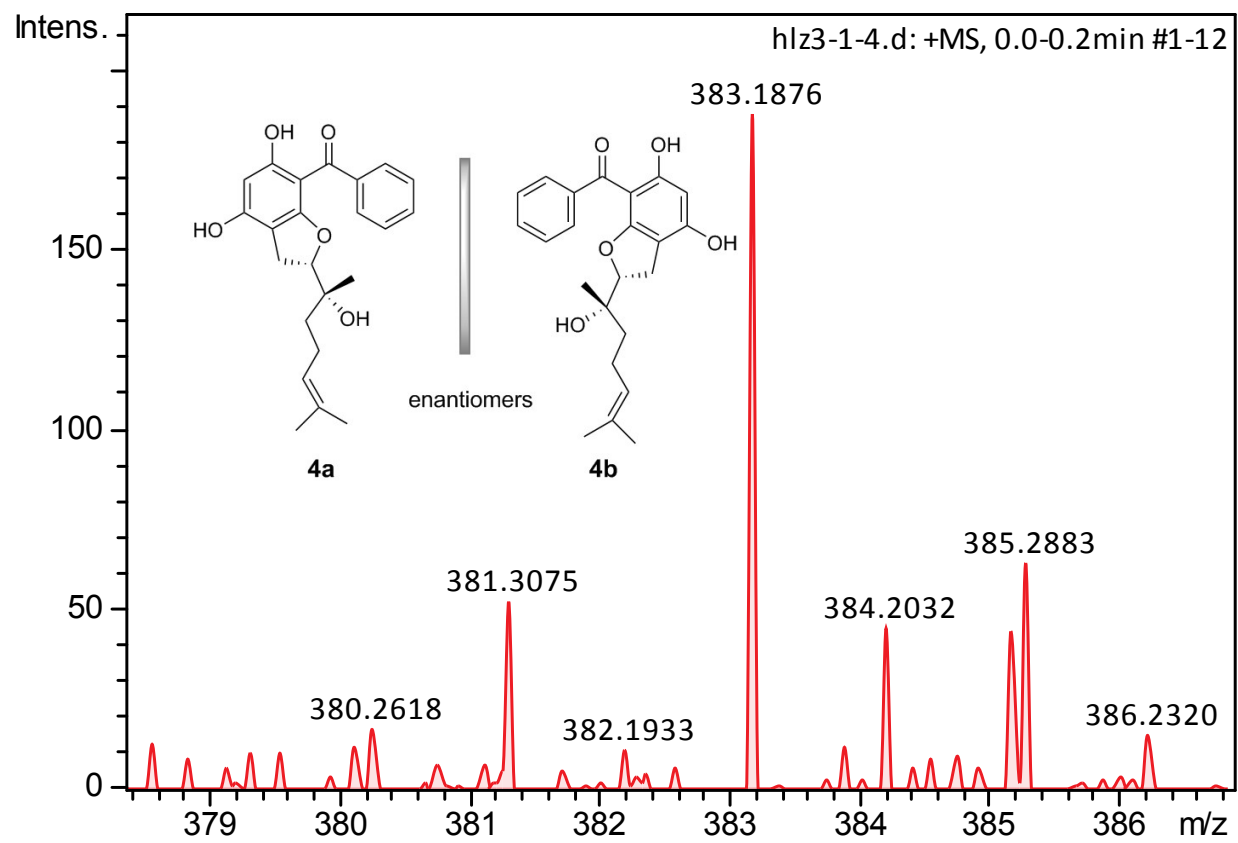

<sup>1</sup>H NMR of compound 4 (in methanol-d<sub>4</sub>)

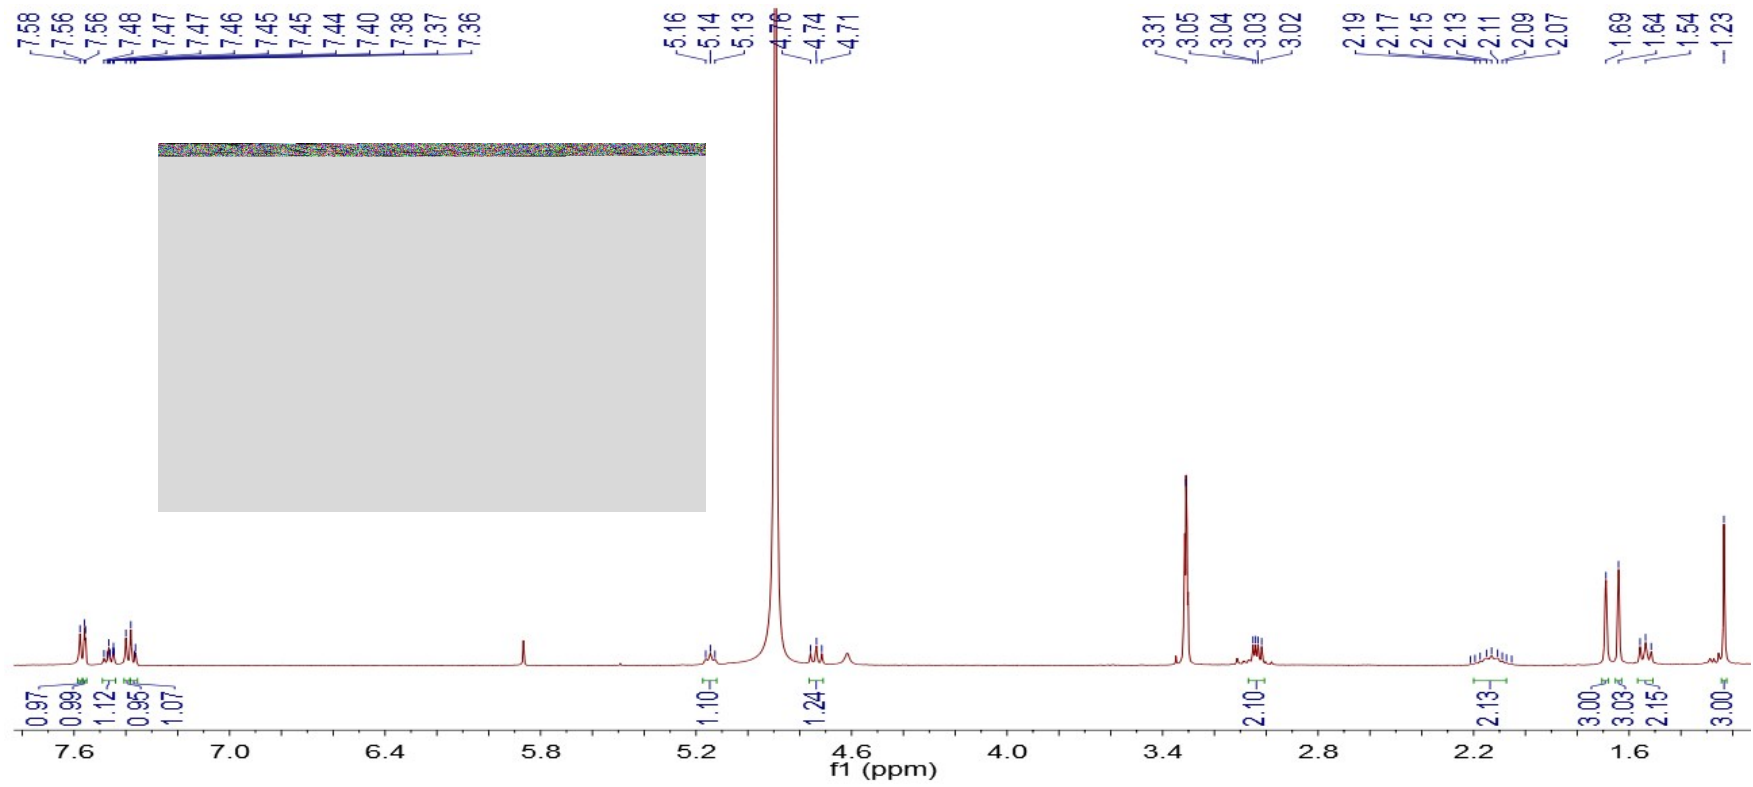

$^{13}\text{C}$  NMR of compound **4** (in methanol- $d_4$ )

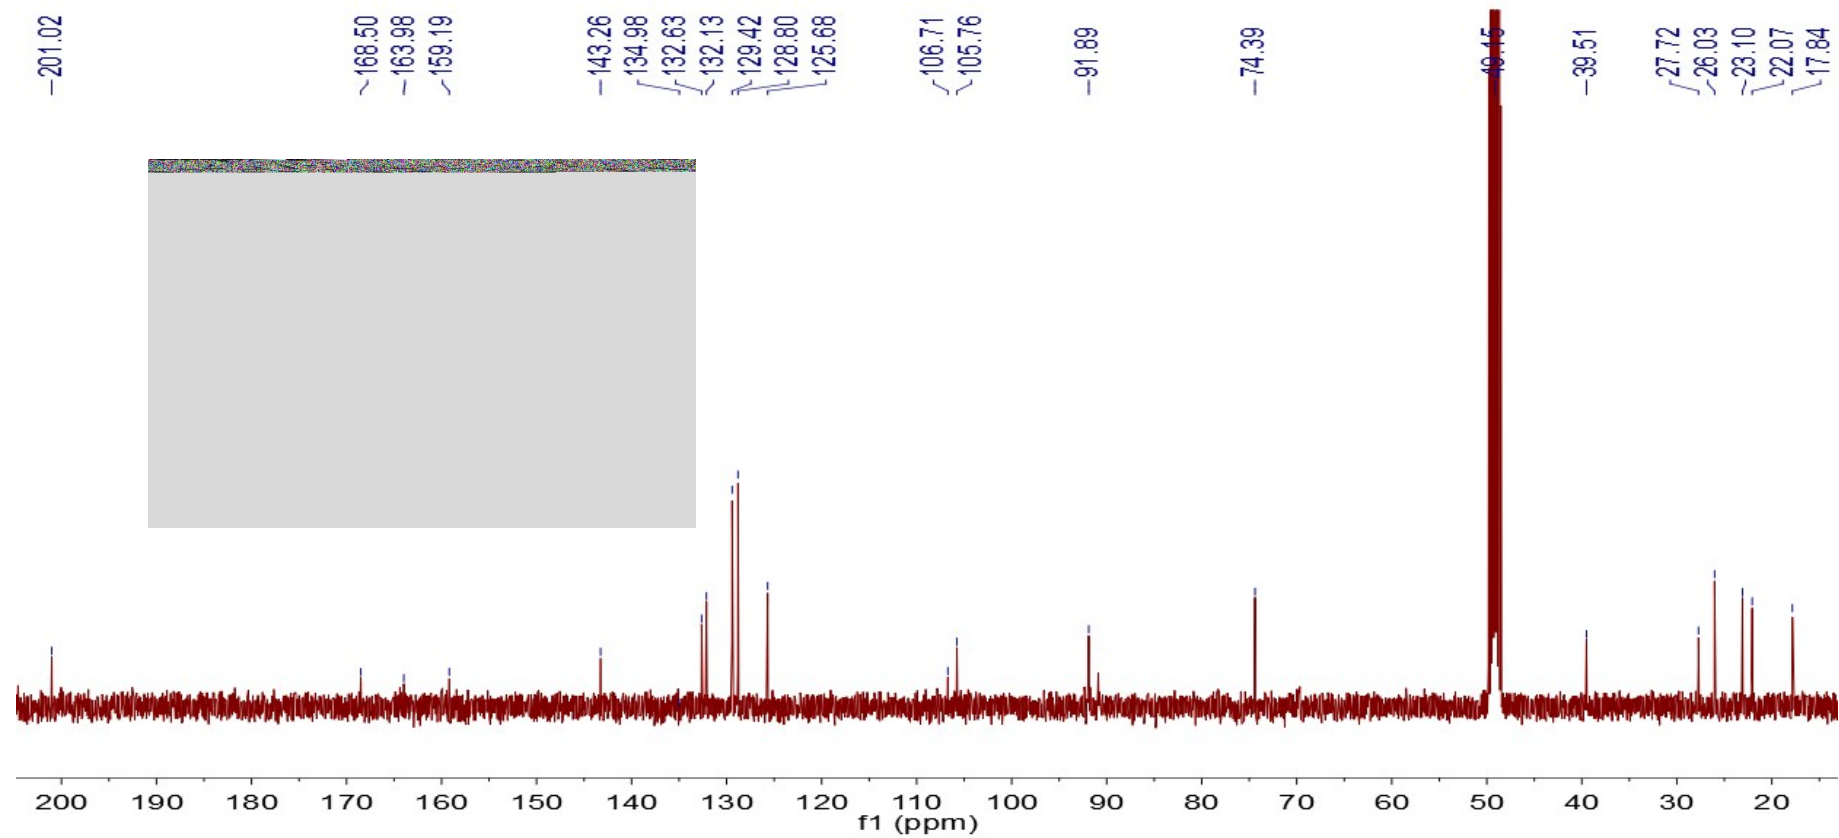

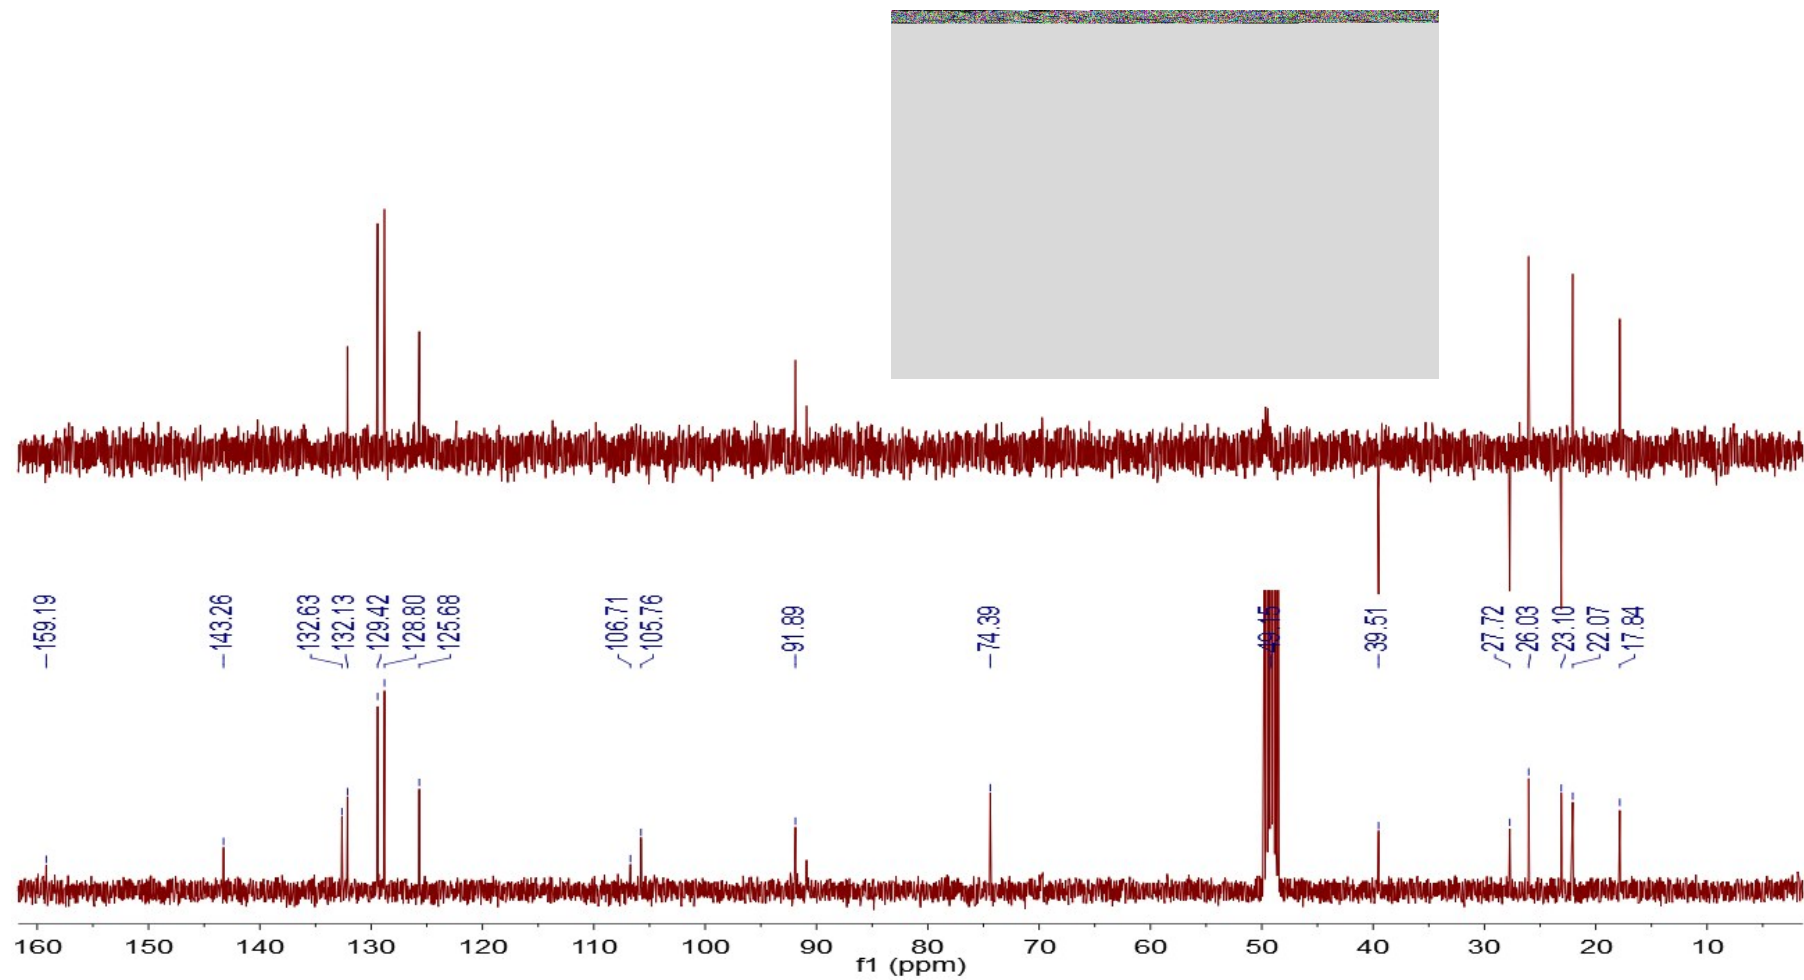



HSQC of compound 4 (in methanol-*d*<sub>4</sub>)

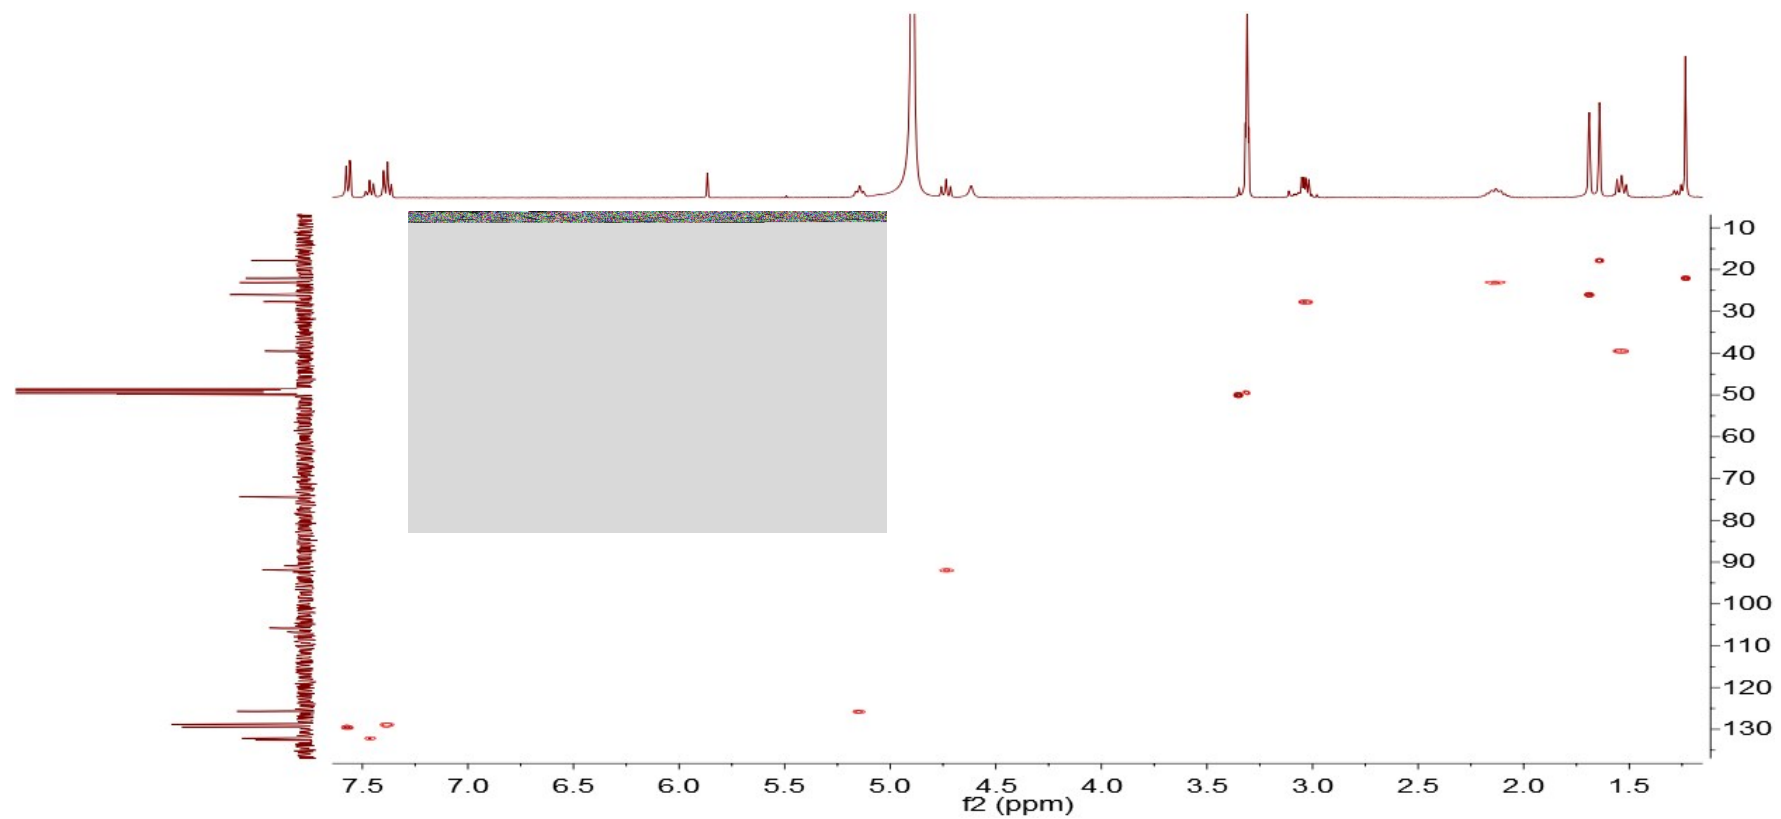

HMBC of compound 4 (in methanol- $d_4$ )

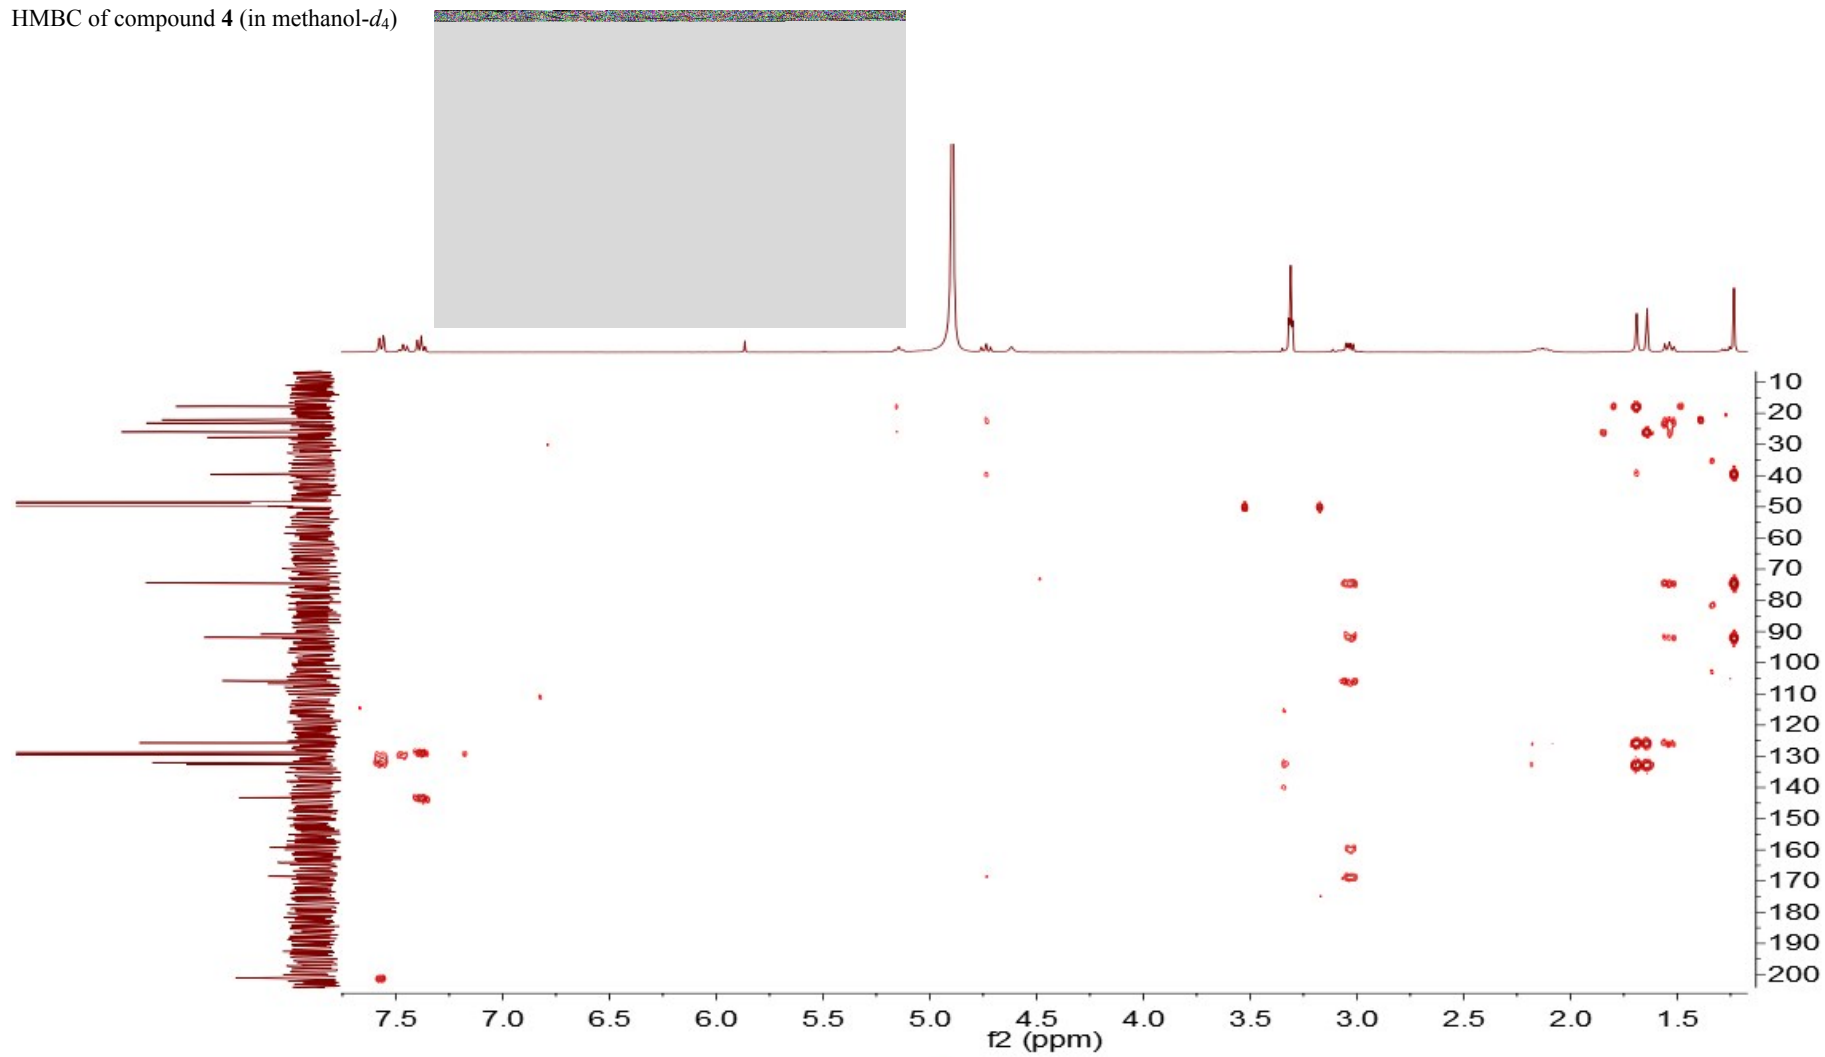

$^1\text{H}$ - $^1\text{H}$  COSY of compound **4** (in methanol- $d_4$ )

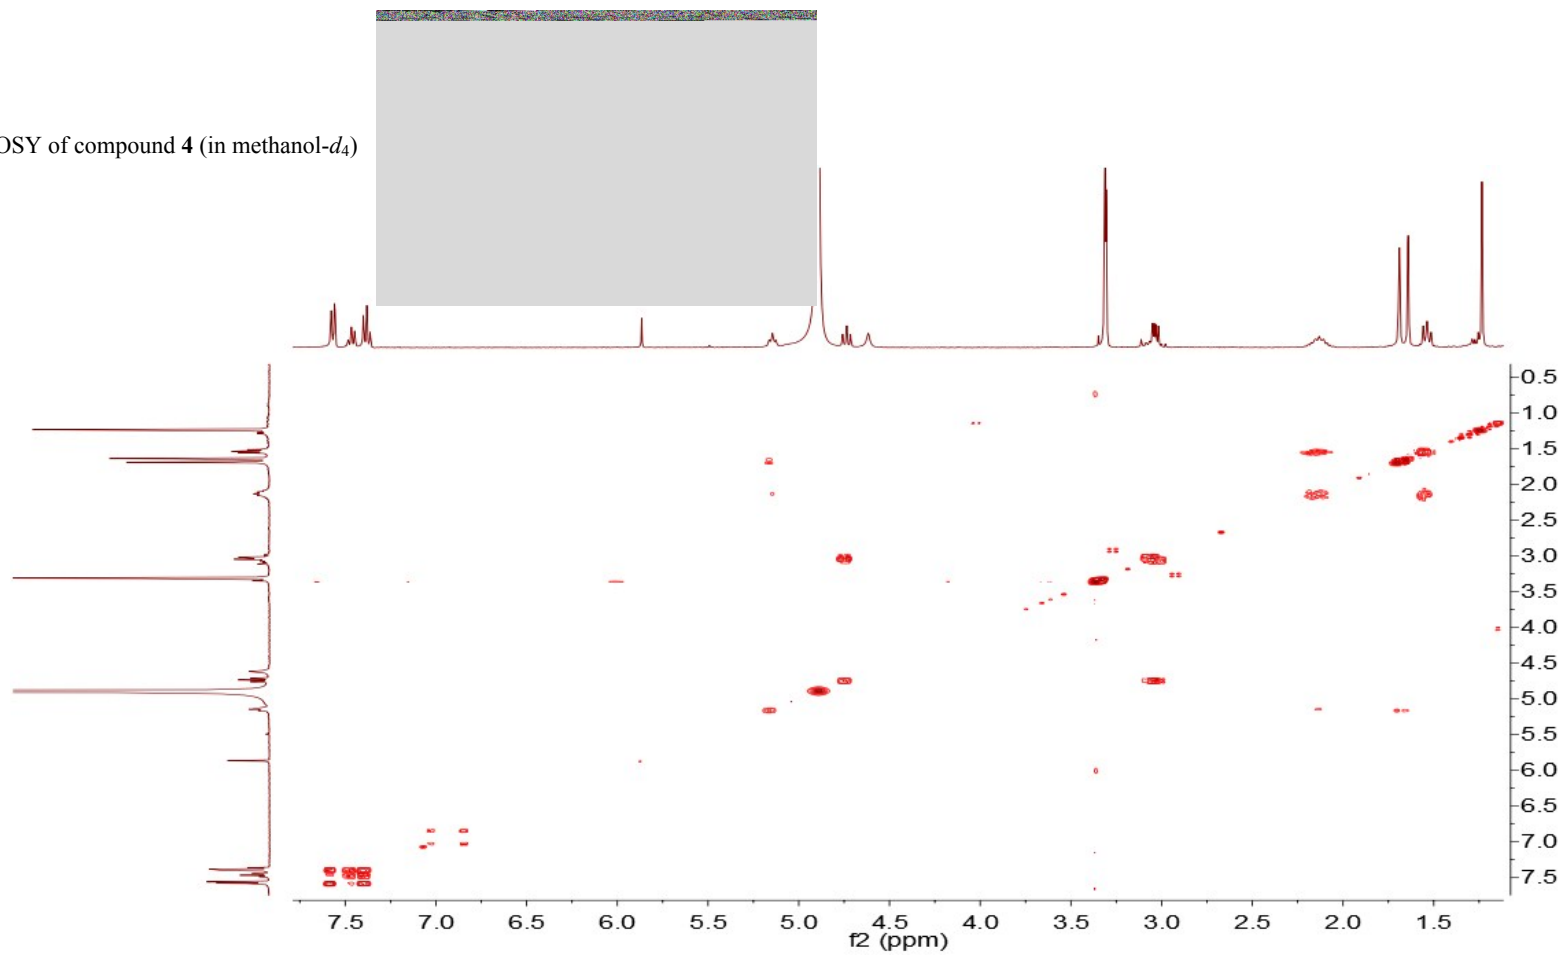

NOESY of compound 4 (in methanol-*d*<sub>4</sub>)

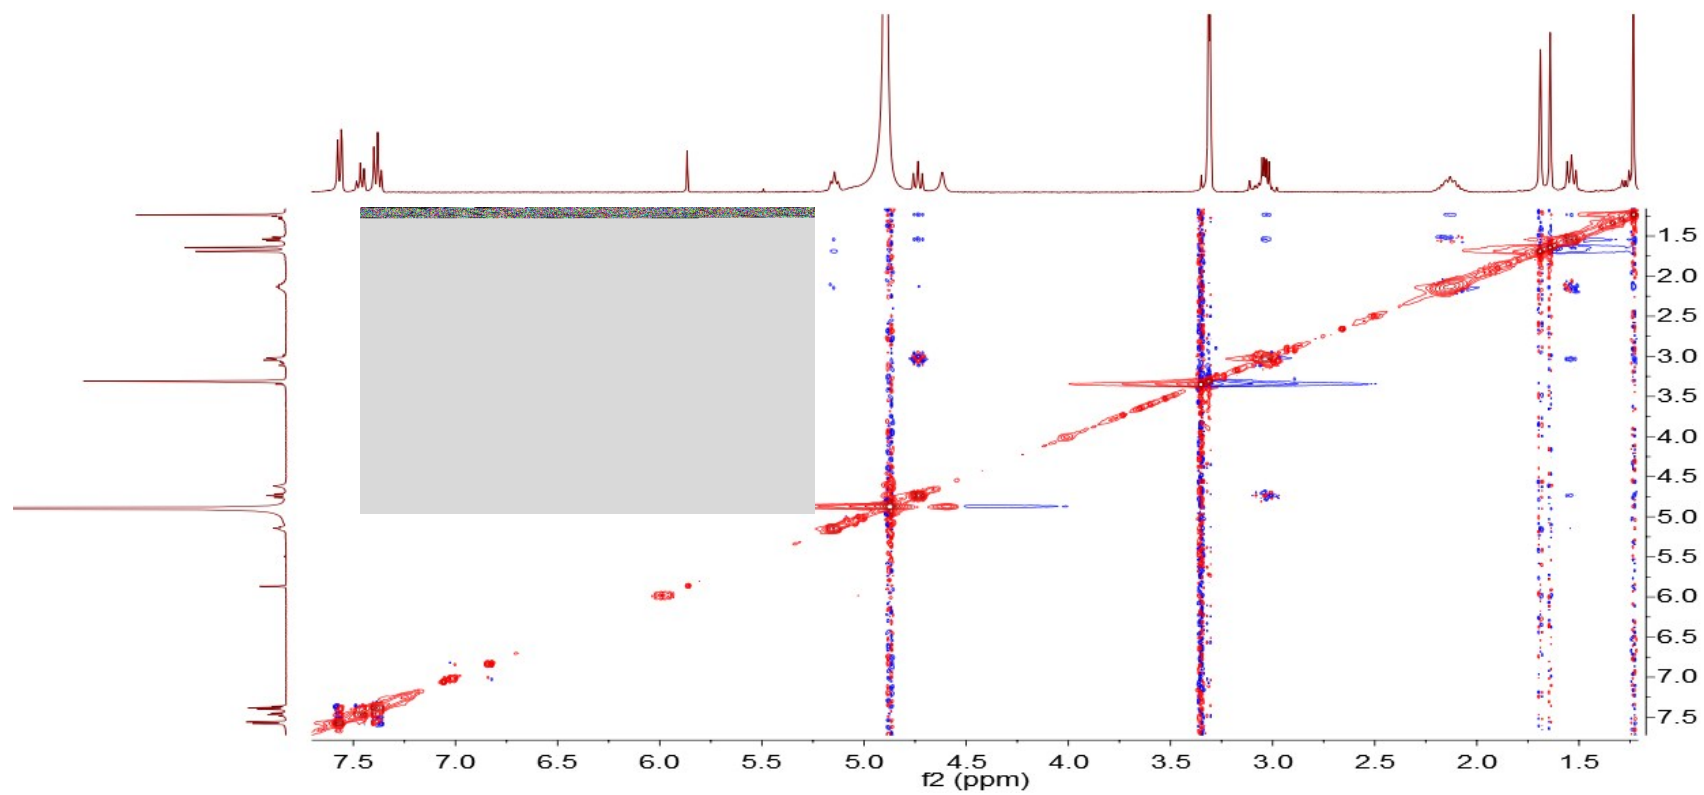

UV of compound 4 (in MeOH)

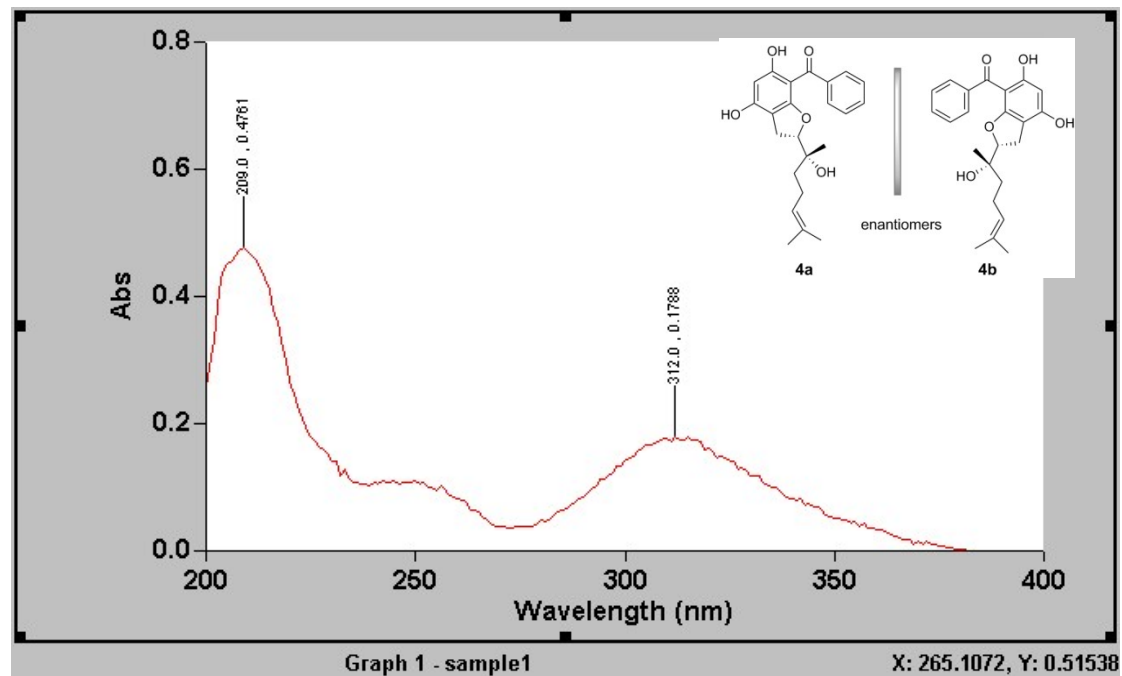

IR of compound 4 (KBr disc)

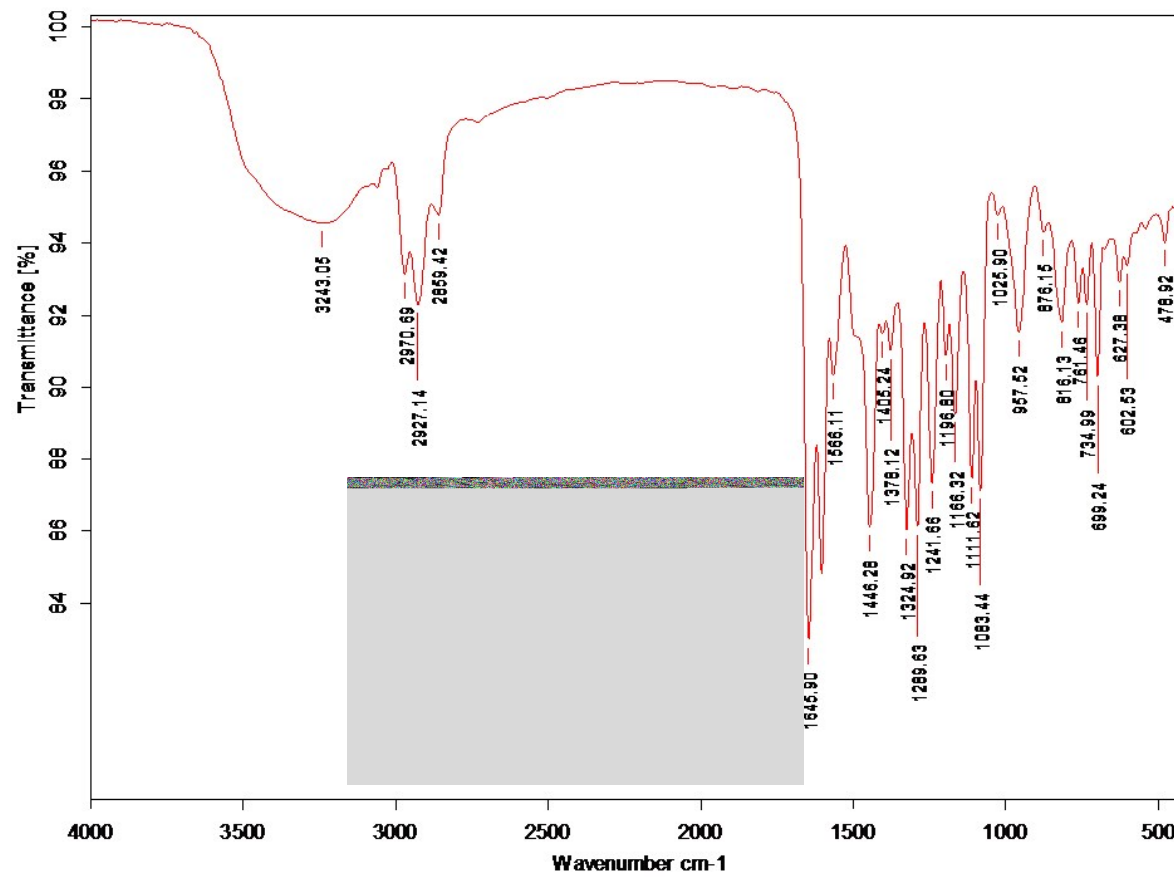

Supplement: c8ra04073g1.pdf [file c8ra04073g1.pdf]
